# Supplementary material for: Remote difunctionalization of 2H-indazoles using Koser's reagents
Source: Royal Society of Chemistry journal article supplement (doi:10.1039/d1cc06129a), 2021-12-15
Supplement: d1cc06129a1.pdf [file d1cc06129a1.pdf]

## Electronic Supporting Information

# Remote Difunctionalization of 2*H*-Indazoles Using Koser's Reagents

Suvam Bhattacharjee, Sudip Laru, and Alakananda Hajra\*

Department of Chemistry, Visva-Bharati (A Central University), Santiniketan 731235, India

Email: [alakananda.hajra@visva-bharati.ac.in](mailto:alakananda.hajra@visva-bharati.ac.in)

## Contents

| Sl. No. | Topics                                                                                                                | Page No. |
|---------|-----------------------------------------------------------------------------------------------------------------------|----------|
| 1       | General information:                                                                                                  | S3       |
| 2       | Structure determination (X-ray crystallographic data for <b>3ga</b> ):                                                | S3-S5    |
| 3       | Synthetic procedure for 3-Methyl-2-( <i>p</i> -tolyl)-2 <i>H</i> -indazole ( <b>4b</b> ):                             | S5       |
| 4       | General experimental procedure for the synthesis of <b>3aa-3bf</b> :                                                  | S5-S6    |
| 5       | Gram scale synthesis of 7-Iodo-2-phenyl-2 <i>H</i> -indazol-4-yl 4-methylbenzenesulfonate ( <b>3aa</b> ):             | S6       |
| 6       | Stepwise Synthesis of ( <i>E</i> )-2,4-Diphenyl-7-styryl-2 <i>H</i> -indazole ( <b>7aa</b> ):                         | S7       |
| 7       | The synthetic procedure of 2,4,7-triphenyl-2 <i>H</i> -indazole ( <b>8aa</b> ):                                       | S8       |
| 8       | Stepwise synthetic procedure of 2-Phenyl-7-(phenylethynyl)-4-( <i>p</i> -tolyl)-2 <i>H</i> -indazole ( <b>11ab</b> ): | S9       |
| 8       | Characterization data of the synthesized compounds ( <b>3aa-11ab</b> ):                                               | S10-S28  |
| 10      | References:                                                                                                           | S29      |
| 11      | NMR spectra [ <sup>1</sup> H, and <sup>13</sup> C{ <sup>1</sup> H}] of synthesized products:                          | S30-S108 |

## 1. General information:

All reagents were purchased from commercial sources and used without further purification.  $^1\text{H}$  NMR spectra were determined on a 400 MHz spectrometer as solutions in  $\text{CDCl}_3$ . Chemical shifts are expressed in parts per million ( $\delta$ ) and the signals were reported as s (singlet), d (doublet), t (triplet), q (quartet), m (multiplet), and coupling constants ( $J$ ) were given in Hz.  $^{13}\text{C}\{^1\text{H}\}$  NMR spectra were recorded at 100 MHz in  $\text{CDCl}_3$  solution. Chemical shifts are referenced to  $\text{CDCl}_3$  ( $\delta = 7.26$  for  $^1\text{H}$  and  $\delta = 77.16$  for  $^{13}\text{C}\{^1\text{H}\}$  NMR) as internal standard. TLC was done on a silica gel-coated glass slide. All solvents were dried and distilled before use. Commercially available solvents were freshly distilled before the reaction. Melting points (M.p.) were determined after the re-crystallization of solid compounds from a solution of dichloromethane/petroleum ether (1:3). All the 2*H*-indazoles<sup>1</sup> and koser's reagents<sup>2</sup> were prepared by this reported method.

## 2. Structure determination (X-ray crystallographic data for 3ga):

The brown crystal of **3ga** was obtained by crystallization from a solution in dichloromethane/petroleum ether after purification by column chromatography. Chemical formula:  $\text{C}_{23}\text{H}_{19}\text{IN}_2\text{O}_5\text{S}$ .

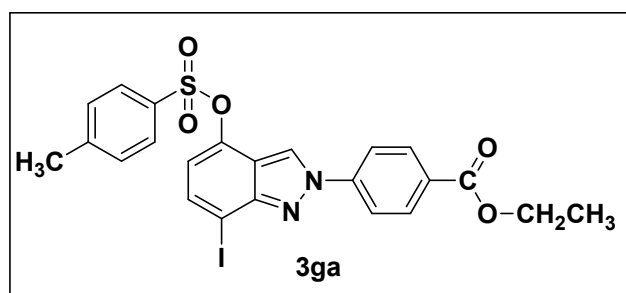

Mol. formula:  $\text{C}_{23}\text{H}_{19}\text{IN}_2\text{O}_5\text{S}$

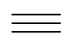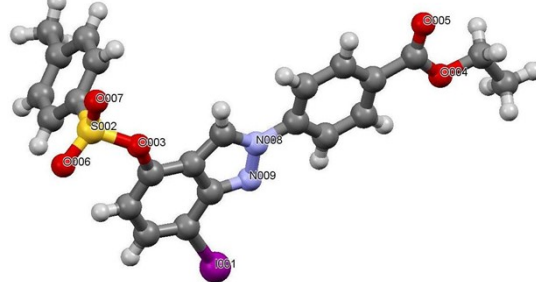

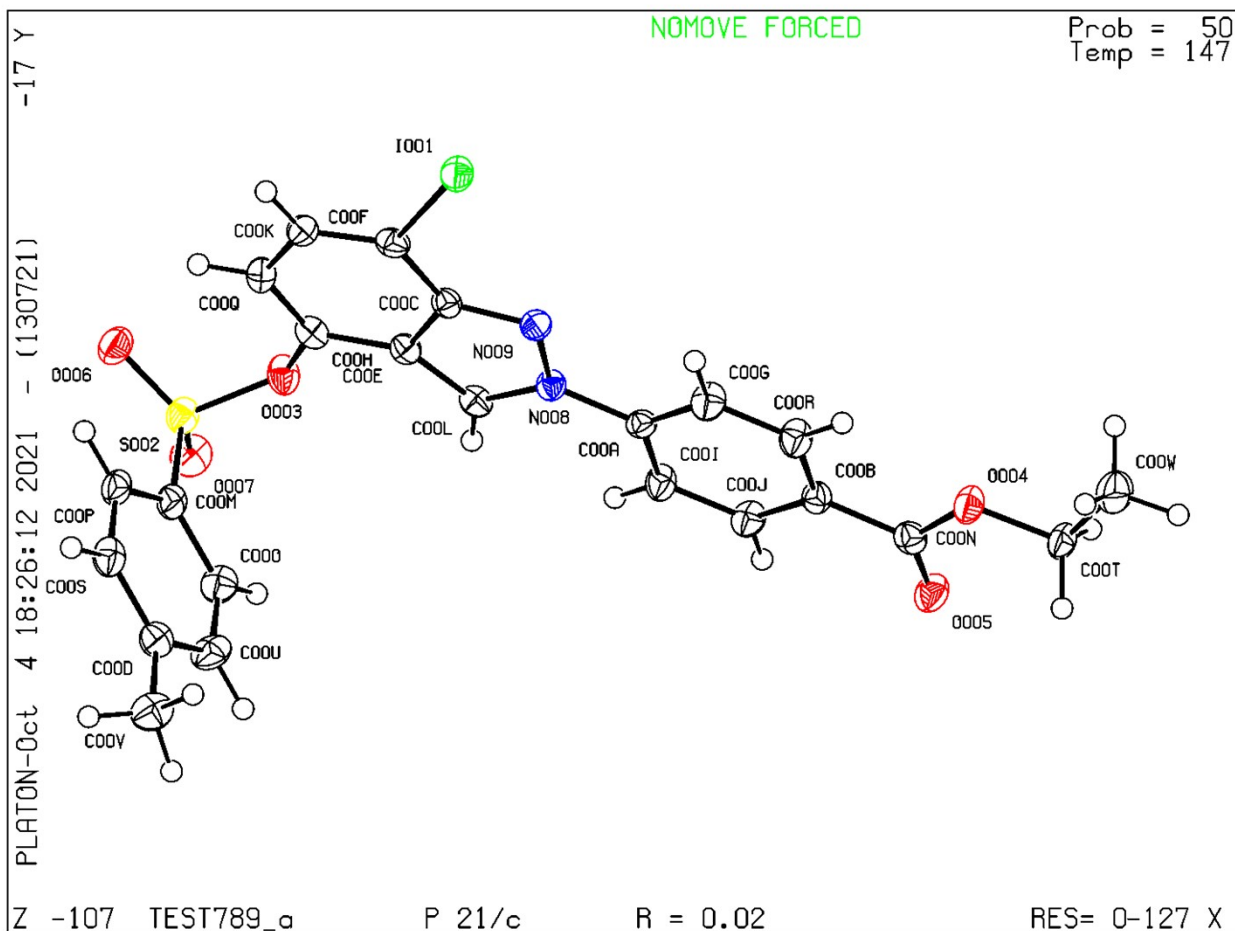

View of ORTEP diagram for the crystal structure of the compound **Ethyl 4-(7-iodo-4-(tosyloxy)-2H-indazol-2-yl)benzoate (3ga)** (Thermal ellipsoid contour at 50% probability level).

|                             |                                                                   |                |
|-----------------------------|-------------------------------------------------------------------|----------------|
| <b>Wavelength</b>           | 0.71073 Å                                                         |                |
| <b>Formula</b>              | C <sub>23</sub> H <sub>19</sub> I N <sub>2</sub> O <sub>5</sub> S |                |
| <b>Crystal system</b>       | Monoclinic                                                        |                |
| <b>Space group</b>          | P 2 <sub>1</sub> /c                                               |                |
| <b>Unit cell dimensions</b> | a = 8.5871(6) Å                                                   | α = 90 °       |
|                             | b = 22.0393(15) Å                                                 | β = 90.532(2)° |
|                             | c = 11.5720(7) Å                                                  | γ = 90 °       |

|                     |                        |  |
|---------------------|------------------------|--|
| <b>Volume</b>       | 2189.95 Å <sup>3</sup> |  |
| <b>Z</b>            | 4                      |  |
| <b>R-factor (%)</b> | 2.35                   |  |

The crystallographic data have been deposited with the Cambridge Crystallographic Data Centre as a supplementary publication with a CCDC reference number CCDC 2113810.

### 3. Synthetic procedure for 3-Methyl-2-(*p*-tolyl)-2*H*-indazole (**4b**):

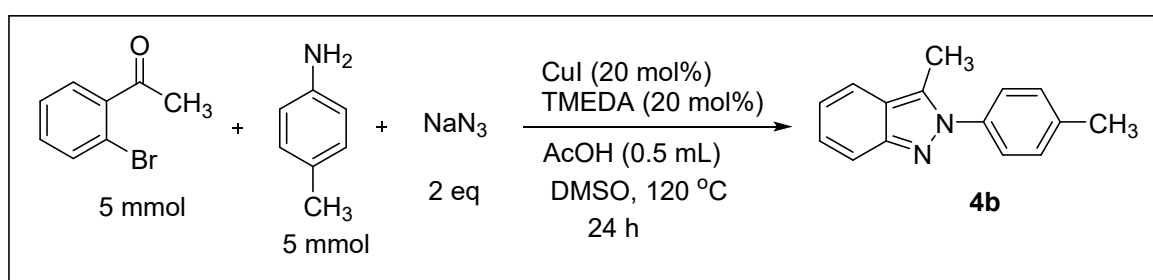

To a stirred solution of 1-(2-bromophenyl)ethan-1-one (5 mmol, 995 mg), *p*-toluidine (5 mmol, 535 mg), and sodium azide (2 eq, 650 mg) in the presence of CuI (20 mol%, 390 mg), TMEDA (20 mol%, 116 mg), and AcOH (0.5 mL) in DMSO (10 mL) were added successively. The resulting solution was heated in a 100 mL round-bottom flask for 24 h at 120 °C. After the completion of the reaction (monitored by TLC), the crude reaction mixture was extracted with ethyl acetate. The organic extract was dried over anhydrous Na<sub>2</sub>SO<sub>4</sub> and concentrated. The product was subjected to column chromatography (silica gel, 60-120 mesh), eluting with petroleum ether and ethyl acetate (97:3) to afford the product **4b** (62%, 689 mg) as yellow gummy mass.

### 4. General experimental procedure for the synthesis of 3aa-3bf:

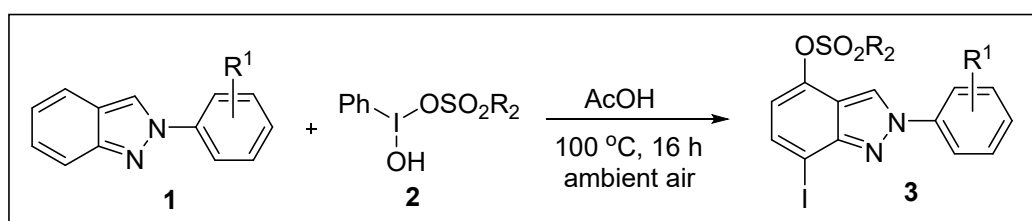

2-(*p*-tolyl)-2*H*-indazole (**1b**, 0.2 mmol, 41.2 mg) and HTIB (Koser's reagent) (**2a**, 2.0 equiv, 156.8 mg), in 2.0 mL AcOH solvent were added to an oven-dried reaction tube equipped with

a magnetic stirrer, and the reaction tube was heated in an oil bath at 100 °C for 16 h under ambient air. The progress of the reaction was monitored by TLC. After completion of the reaction, the reaction was cooled to room temperature and extracted with ethyl acetate and a saturated solution of sodium bicarbonate. The combined organic phase was dried over anhydrous Na<sub>2</sub>SO<sub>4</sub> and concentrated under reduced pressure to get the crude residue which was purified by column chromatography on silica gel (60–120 mesh) using a mixture of petroleum ether and ethyl acetate (95 : 5) as an eluent to afford the product **3ba** (73%, 73 mg) as black gummy mass.

### 5. Gram scale synthesis of 7-Iodo-2-phenyl-2*H*-indazol-4-yl 4-methylbenzenesulfonate (**3aa**):

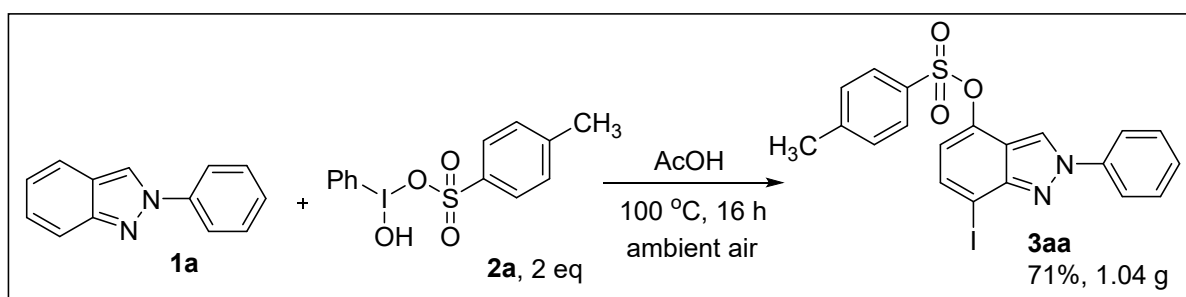

To a 100 mL round bottom flask equipped with a stir bar were charged with 2-phenyl-2*H*-indazole (**1a**, 3.0 mmol, 582.3 mg) and Koser's agent (**2a**, 6.0 mmol, 2353.2 mg), in 30 mL AcOH were added to an oven-dried reaction tube equipped with a magnetic stirrer, and the reaction tube was heated in an oil bath at 100 °C for 16 h under ambient air. The progress of the reaction was monitored by TLC. After completion of the reaction, the reaction was cooled to room temperature and extracted with 50 mL ethyl acetate and a saturated solution of sodium bicarbonate. The combined organic phase was dried over anhydrous Na<sub>2</sub>SO<sub>4</sub> and concentrated under reduced pressure to get the crude residue which was purified by column chromatography on silica gel (60–120 mesh) using a mixture of petroleum ether and ethyl acetate (96 : 4) as an eluent to afford the product **3aa** (71%, 1.04 g) as grey solid.

## 6. Stepwise synthesis of (*E*)-2,4-Diphenyl-7-styryl-2*H*-indazole (**7aa**):

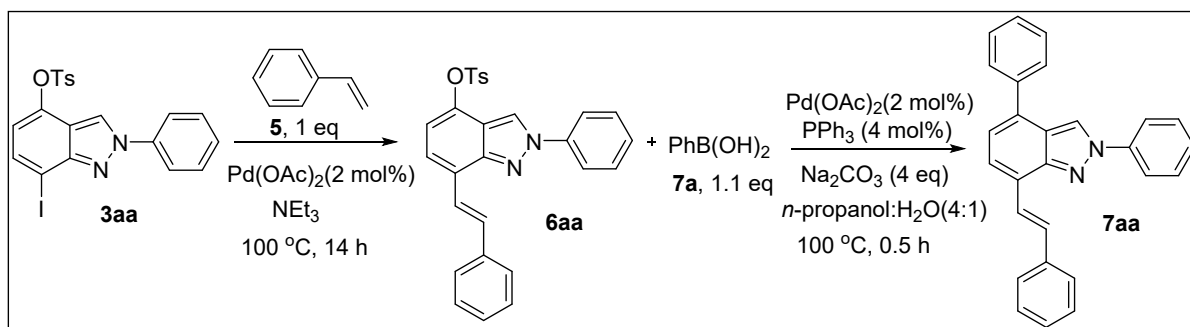

To a stirred solution of 7-Iodo-2-phenyl-2*H*-indazol-4-yl 4-methylbenzenesulfonate (**3aa**) (0.25 mmol, 122.5 mg) and styrene (**5**) (0.25 mmol, 26 mg) in equimolar quantity in the presence of Pd(OAc)<sub>2</sub> (2.0 mol%, 1.1 mg) in triethylamine (1 mL) were added successively. The resulting solution was heated in a sealed tube for 14 h at 100 °C under an open atmosphere. After the completion of the reaction (monitored by TLC), the crude reaction mixture was extracted with ethyl acetate. The organic extract was dried over anhydrous Na<sub>2</sub>SO<sub>4</sub> and concentrated. The product was subjected to column chromatography (silica gel, 60-120 mesh), eluting with petroleum ether and ethyl acetate (97:3) to afford the product **6aa** (79%, 92.1 mg) as yellow gummy mass. After that, a mixture of (*E*)-2-Phenyl-7-styryl-2*H*-indazol-4-yl 4-methylbenzenesulfonate (0.1 mmol, 46.6 mg) (**6aa**) and phenylboronic acid (1.1 equiv, 13.4 mg) was taken in an oven-dried reaction tube in presence of Pd(OAc)<sub>2</sub> (2.0 mol%, 0.4 mg), PPh<sub>3</sub> (4 mol%, 1.0 mg), and Na<sub>2</sub>CO<sub>3</sub> (4.0 equiv, 42.4 mg) in 2mL *n*-propanol:H<sub>2</sub>O (4:1) and stirred at 100 °C under open atmosphere for 0.5 h. After the completion of the reaction (monitored by TLC), the crude reaction mixture was extracted with ethyl acetate. The organic extract was dried over anhydrous Na<sub>2</sub>SO<sub>4</sub> and concentrated. The product was subjected to column chromatography (silica gel, 60-120 mesh), eluting with petroleum ether and ethyl acetate (98:2) to afford the product **7aa** (70%, 26 mg) as yellow solid.

## 7. Synthetic procedure of 2,4,7-triphenyl-2*H*-indazole (**8aa**):

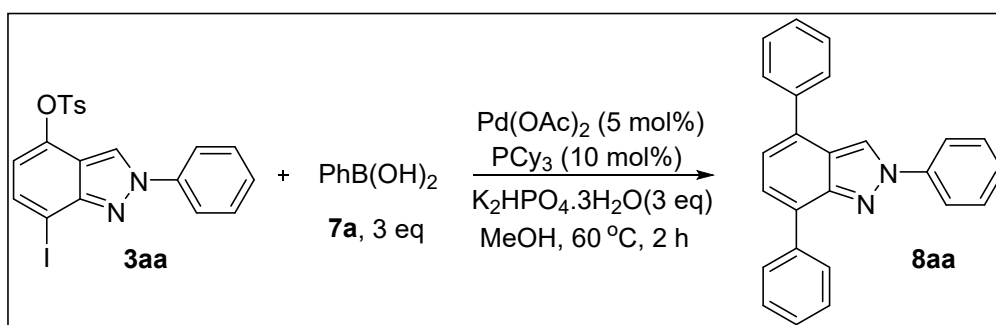

A mixture of 7-Iodo-2-phenyl-2*H*-indazol-4-yl 4-methylbenzenesulfonate (**3aa**) (0.2 mmol, 98 mg) and phenylboronic acid (**7a**) (3 equiv, 73.1 mg) was taken in an oven-dried reaction tube in presence of Pd(OAc)<sub>2</sub> (5.0 mol%, 2.2 mg), PCy<sub>3</sub> (10 mol%, 11.2 mg), and K<sub>2</sub>HPO<sub>4</sub>·3H<sub>2</sub>O (3.0 equiv, 136.9 mg) in 2 mL MeOH and stirred at 100 °C for 2 h. After the completion of the reaction (monitored by TLC), the crude reaction mixture was extracted with ethyl acetate. The organic extract was dried over anhydrous Na<sub>2</sub>SO<sub>4</sub> and concentrated. The product was subjected to column chromatography (silica gel, 60-120 mesh), eluting with petroleum ether and ethyl acetate (98.5 : 1.5) to afford the product **8aa** (62%, 42 mg) as yellow solid.



## 8. Stepwise synthetic procedure of 2-Phenyl-7-(phenylethynyl)-4-(*p*-tolyl)-2*H*-indazole (**11ab**):

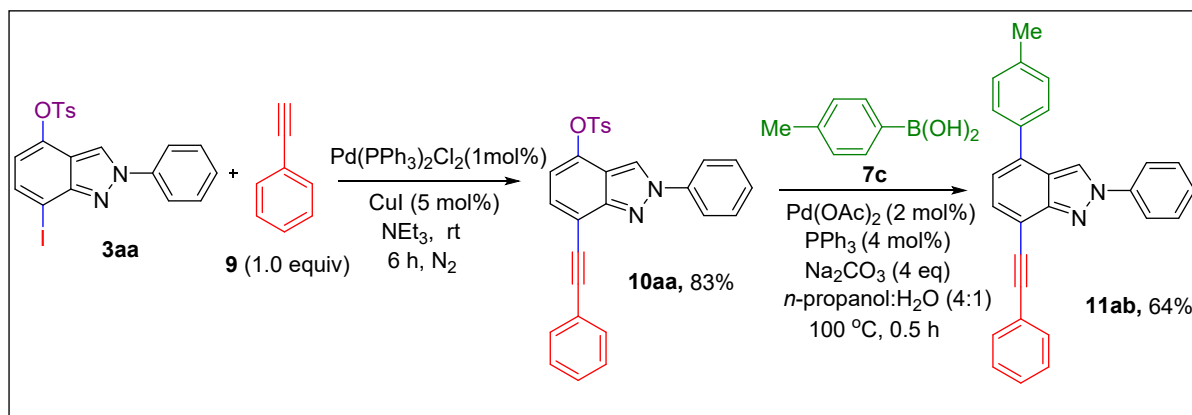

To a stirred solution of 7-Iodo-2-phenyl-2*H*-indazol-4-yl 4-methylbenzenesulfonate (**3aa**) (0.2 mmol, 98 mg) and Phenylacetylene (**9**) (0.2 mmol, 20.4 mg) in equimolar quantity in the presence of Pd(PPh<sub>3</sub>)<sub>2</sub>Cl<sub>2</sub> (1.0 mol%, 1.4 mg) and CuI (5 mol%, 1.9 mg) in triethylamine (1 mL) were added successively under N<sub>2</sub> atmosphere at room temperature for 6 h. After the completion of the reaction (monitored by TLC), the crude reaction mixture was extracted with ethyl acetate. The organic extract was dried over anhydrous Na<sub>2</sub>SO<sub>4</sub> and concentrated. The product was subjected to column chromatography (silica gel, 100-200 mesh), eluting with petroleum ether and ethyl acetate (97:3) to afford the product **10aa** (83%, 77 mg) as brown gummy mass. After that, a mixture of 2-Phenyl-7-(phenylethynyl)-2*H*-indazol-4-yl 4-methylbenzenesulfonate (0.1 mmol, 46.1 mg) (**10aa**) and *p*-tolylphenylboronic acid (**7b**) (1.1 equiv, 14.9 mg) was taken in an oven-dried reaction tube in presence of Pd(OAc)<sub>2</sub> (2.0 mol%, 0.4 mg), PPh<sub>3</sub> (4 mol%, 1.0 mg), and Na<sub>2</sub>CO<sub>3</sub> (4.0 equiv, 42.4 mg) in 2mL *n*-propanol:H<sub>2</sub>O (4:1) and stirred at 100 °C under open atmosphere for 0.5 h. After the completion of the reaction (monitored by TLC), the crude reaction mixture was extracted with ethyl acetate. The organic extract was dried over anhydrous Na<sub>2</sub>SO<sub>4</sub> and concentrated. The product was subjected to column chromatography (silica gel, 60-120 mesh), eluting with petroleum ether and ethyl acetate (98:2) to afford the product **11ab** (64%, 24 mg) as a white solid.

## 9. Characterization data of the synthesized compounds (3aa–11ab):

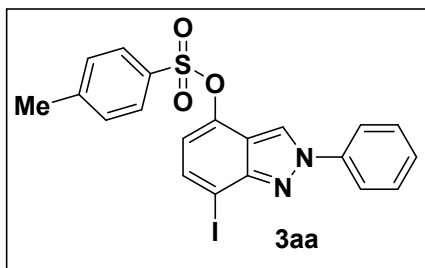

**7-Iodo-2-phenyl-2H-indazol-4-yl 4-methylbenzenesulfonate (3aa):** Grey solid (77 mg, 79%); M.p. 128–129 °C;  $R_f = 0.55$  (PE : EA = 96 : 4);  $^1\text{H NMR}$  ( $\text{CDCl}_3$ , 400 MHz):  $\delta$  8.37 (s, 1H), 7.86–7.84 (m, 2H), 7.75 (d,  $J = 8.4$  Hz, 2H), 7.61 (d,  $J = 7.6$  Hz, 1H), 7.53 (t,  $J = 8.0$  Hz, 2H), 7.44 (t,  $J = 7.2$  Hz, 1H), 7.31 (d,  $J = 8.0$  Hz, 2H), 6.38 (d,  $J = 8.0$  Hz, 1H), 2.42 (s, 3H);  $^{13}\text{C}\{^1\text{H}\}$  NMR ( $\text{CDCl}_3$ , 100 MHz):  $\delta$  151.7, 145.9, 143.0, 139.9, 135.7, 132.1, 130.0, 129.7, 128.8, 121.4, 121.1, 117.6, 116.0, 113.2, 82.3, 21.8; Anal. Calcd for  $\text{C}_{20}\text{H}_{15}\text{IN}_2\text{O}_3\text{S}$ : C, 48.99; H, 3.08; N, 5.71%; Found C, 48.78; H, 3.15; N, 5.59%.

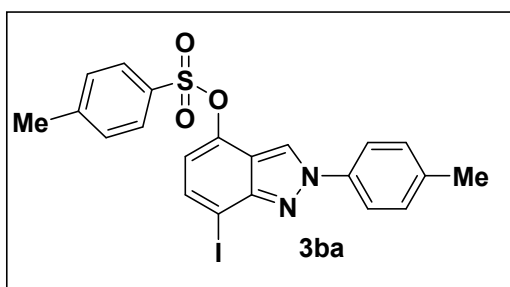

**7-Iodo-2-(*p*-tolyl)-2H-indazol-4-yl 4-methylbenzenesulfonate (3ba):** Black gummy mass (73 mg, 73%);  $R_f = 0.5$  (PE : EA = 95 : 5);  $^1\text{H NMR}$  ( $\text{CDCl}_3$ , 400 MHz):  $\delta$  8.32 (s, 1H), 7.76–7.71 (m, 4H), 7.60 (d,  $J = 7.6$  Hz, 1H), 7.32–7.30 (m, 4H), 6.38 (d,  $J = 7.6$  Hz, 1H), 2.43 (s, 3H), 2.42 (s, 3H);  $^{13}\text{C}\{^1\text{H}\}$  NMR ( $\text{CDCl}_3$ , 100 MHz):  $\delta$  151.6, 145.9, 143.0, 138.9, 137.7, 135.5, 132.1, 130.2, 130.0, 128.8, 121.2, 120.9, 117.5, 115.9, 82.2, 21.8, 21.2; Anal. Calcd for  $\text{C}_{21}\text{H}_{17}\text{IN}_2\text{O}_3\text{S}$ : C, 50.01; H, 3.40; N, 5.55%; Found C, 50.19; H, 3.34; N, 5.79%.

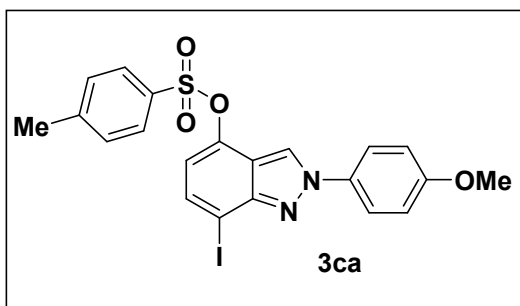

**7-Iodo-2-(4-methoxyphenyl)-2H-indazol-4-yl 4-methylbenzenesulfonate (3ca):** Brown gummy mass (72 mg, 70%);  $R_f = 0.45$  (PE : EA = 94 : 6);  $^1\text{H}$  NMR ( $\text{CDCl}_3$ , 400 MHz):  $\delta$  8.29 (s, 1H), 7.76-7.74 (m, 4H), 7.59 (d,  $J = 8.0$  Hz, 1H), 7.31 (d,  $J = 8.4$  Hz, 2H), 7.03-7.01 (m, 2H), 6.37 (d,  $J = 8.0$  Hz, 1H), 3.88 (s, 3H), 2.43 (s, 3H);  $^{13}\text{C}\{^1\text{H}\}$  NMR ( $\text{CDCl}_3$ , 100 MHz):  $\delta$  160.0, 145.9, 136.0, 133.4, 130.1, 130.0, 128.8, 127.1, 125.3, 122.8, 120.9, 115.8, 115.2, 114.8, 82.1, 55.8, 21.8; Anal. Calcd for  $\text{C}_{21}\text{H}_{17}\text{IN}_2\text{O}_4\text{S}$ : C, 48.47; H, 3.29; N, 5.38%; Found C, 48.30; H, 3.37; N, 5.28%.

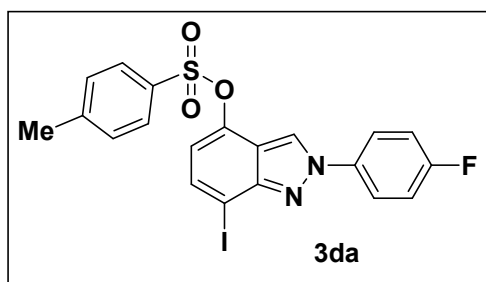

**2-(4-Fluorophenyl)-7-iodo-2H-indazol-4-yl 4-methylbenzenesulfonate (3da):** Brown solid (90 mg, 89%); M.p. 176-177 °C;  $R_f = 0.5$  (PE : EA = 95 : 5);  $^1\text{H}$  NMR ( $\text{CDCl}_3$ , 400 MHz):  $\delta$  8.37 (s, 1H), 7.85-7.82 (m, 2H), 7.75 (d,  $J = 8.4$  Hz, 2H), 7.60 (d,  $J = 7.6$  Hz, 1H), 7.31 (d,  $J = 8.0$  Hz, 2H), 7.24-7.19 (m, 2H), 6.35 (d,  $J = 8.0$  Hz, 1H), 2.42 (s, 3H);  $^{13}\text{C}\{^1\text{H}\}$  NMR ( $\text{CDCl}_3$ , 100 MHz):  $\delta$  162.6 ( $J_{\text{C-F}} = 248$  Hz), 151.8, 145.9, 142.9, 136.2 ( $J_{\text{C-F}} = 3$  Hz), 135.8, 132.0, 130.0, 128.8, 123.2 ( $J_{\text{C-F}} = 9$  Hz), 121.3, 117.7, 123.7 ( $J_{\text{C-F}} = 23$  Hz), 116.1, 82.2, 21.8; Anal. Calcd for  $\text{C}_{20}\text{H}_{14}\text{FIN}_2\text{O}_3\text{S}$ : C, 47.26; H, 2.78; N, 5.51%; Found C, 47.04; H, 2.83; N, 5.60%.

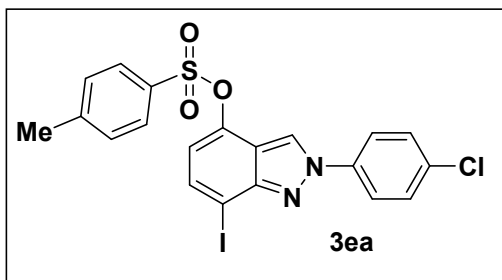

**2-(4-Chlorophenyl)-7-iodo-2H-indazol-4-yl 4-methylbenzenesulfonate (3ea):** Brown solid (85 mg, 81%); M.p. 172-173 °C;  $R_f = 0.5$  (PE : EA = 96 : 4);  $^1\text{H NMR}$  ( $\text{CDCl}_3$ , 400 MHz):  $\delta$  8.40 (s, 1H), 7.83-7.81 (m, 2H), 7.75 (d,  $J = 8.0$  Hz, 2H), 7.61 (d,  $J = 7.6$  Hz, 1H), 7.52-7.48 (m, 2H), 7.32 (d,  $J = 8.0$  Hz, 2H), 6.34 (d,  $J = 7.6$  Hz, 1H), 2.43 (s, 3H);  $^{13}\text{C}\{^1\text{H}\}$  NMR ( $\text{CDCl}_3$ , 100 MHz):  $\delta$  151.8, 146.0, 142.9, 138.4, 136.0, 134.6, 131.9, 130.0, 129.9, 128.8, 122.4, 121.1, 117.8, 116.2, 82.3, 21.8; Anal. Calcd for  $\text{C}_{20}\text{H}_{14}\text{ClIN}_2\text{O}_3\text{S}$ : C, 45.78; H, 2.69; N, 5.34%; Found C, 45.96; H, 2.63; N, 5.22%.

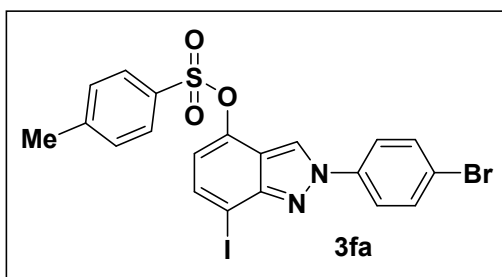

**2-(4-Bromophenyl)-7-iodo-2H-indazol-4-yl 4-methylbenzenesulfonate (3fa):** Brown gummy mass (84 mg, 74%);  $R_f = 0.55$  (PE : EA = 96 : 4);  $^1\text{H NMR}$  ( $\text{CDCl}_3$ , 400 MHz):  $\delta$  8.41 (s, 1H), 7.78-7.74 (m, 4H), 7.67-7.65 (m, 2H), 7.61 (d,  $J = 7.6$  Hz, 1H), 7.32 (d,  $J = 8.4$  Hz, 2H), 6.35 (d,  $J = 8.0$  Hz, 1H), 2.43 (s, 3H);  $^{13}\text{C}\{^1\text{H}\}$  NMR ( $\text{CDCl}_3$ , 100 MHz):  $\delta$  151.8, 146.0, 142.9, 138.8, 136.0, 132.9, 131.9, 130.0, 128.8, 122.7, 122.6, 121.1, 117.8, 116.2, 82.3, 21.8; Anal. Calcd for  $\text{C}_{20}\text{H}_{14}\text{BrIN}_2\text{O}_3\text{S}$ : C, 42.20; H, 2.48; N, 4.92%; Found C, 42.39; H, 2.55; N, 5.06%.

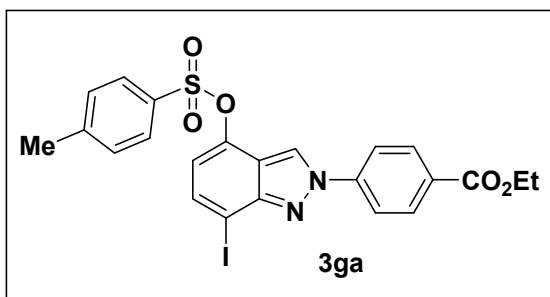

**Ethyl 4-(7-iodo-4-(tosyloxy)-2H-indazol-2-yl)benzoate (3ga):** Brown solid (78 mg, 70%); M.p. 159-160 °C;  $R_f = 0.45$  (PE : EA = 94 : 6);  $^1\text{H NMR}$  ( $\text{CDCl}_3$ , 400 MHz):  $\delta$  8.47 (s, 1H), 8.21 (d,  $J = 8.8$  Hz, 2H), 7.96 (d,  $J = 8.8$  Hz, 2H), 7.76 (d,  $J = 8.0$  Hz, 2H), 7.63 (d,  $J = 7.6$  Hz, 1H), 7.32 (d,  $J = 8.0$  Hz, 2H), 6.38 (d,  $J = 8.0$  Hz, 1H), 4.43 (q,  $J = 7.2$  Hz, 2H), 2.43 (s, 3H), 1.44 (t,  $J = 7.2$  Hz, 3H);  $^{13}\text{C}\{^1\text{H}\}$  NMR ( $\text{CDCl}_3$ , 100 MHz):  $\delta$  165.6, 152.0, 146.0, 143.0, 142.9, 136.3, 132.0, 131.2, 130.6, 130.0, 128.8, 121.3, 120.8, 117.9, 116.4, 82.4, 61.5, 21.8, 14.4; Anal. Calcd for  $\text{C}_{23}\text{H}_{19}\text{IN}_2\text{O}_5\text{S}$ : C, 49.12; H, 3.41; N, 4.98%; Found C, 48.92; H, 3.49; N, 4.89%.

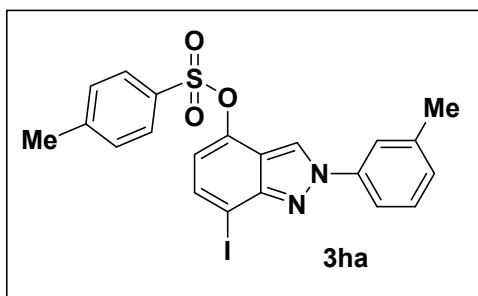

**7-Iodo-2-(*m*-tolyl)-2H-indazol-4-yl 4-methylbenzenesulfonate (3ha):** Brown solid (87 mg, 87%); M.p. 118-119 °C;  $R_f = 0.5$  (PE : EA = 95 : 5);  $^1\text{H NMR}$  ( $\text{CDCl}_3$ , 400 MHz):  $\delta$  8.36 (s, 1H), 7.75 (d,  $J = 8.4$  Hz, 2H), 7.68 (s, 1H), 7.61 (d,  $J = 7.6$  Hz, 2H), 7.39 (t,  $J = 8.0$  Hz, 1H), 7.31 (d,  $J = 8.4$  Hz, 2H), 7.24 (d,  $J = 7.6$  Hz, 1H), 6.38 (d,  $J = 7.6$  Hz, 1H), 2.47 (s, 3H), 2.42 (s, 3H);  $^{13}\text{C}\{^1\text{H}\}$  NMR ( $\text{CDCl}_3$ , 100 MHz):  $\delta$  151.7, 145.9, 143.0, 140.0, 139.8, 135.6, 132.1, 130.0, 129.6, 129.5, 128.8, 122.1, 121.2, 118.4, 117.5, 116.0, 82.3, 21.8, 21.6; Anal. Calcd for  $\text{C}_{21}\text{H}_{17}\text{IN}_2\text{O}_3\text{S}$ : C, 50.01; H, 3.40; N, 5.55%; Found C, 50.23; H, 3.32; N, 5.66%.

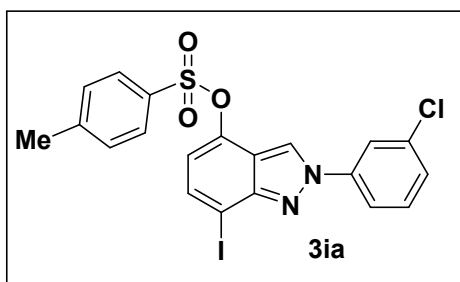

**2-(3-Chlorophenyl)-7-iodo-2H-indazol-4-yl 4-methylbenzenesulfonate (3ia):** Yellow gummy mass (68 mg, 65%);  $R_f = 0.55$  (PE : EA = 96 : 4);  $^1\text{H NMR}$  ( $\text{CDCl}_3$ , 400 MHz):  $\delta$  8.35 (s, 1H), 7.88 (t,  $J = 2.0$  Hz, 1H), 7.76 (d,  $J = 7.6$  Hz, 3H), 7.63 (d,  $J = 7.6$  Hz, 1H), 7.47 (t,  $J = 8.0$  Hz, 1H), 7.42-7.40 (m, 1H), 7.33 (d,  $J = 8.0$  Hz, 2H), 6.38 (d,  $J = 7.6$  Hz, 1H), 2.44 (s, 3H);  $^{13}\text{C}\{^1\text{H}\}$  NMR ( $\text{CDCl}_3$ , 100 MHz):  $\delta$  151.9, 146.1, 142.9, 140.7, 136.1, 135.6, 131.9, 130.8, 130.0, 128.9, 128.8, 121.6, 121.2, 119.3, 117.7, 116.4, 82.4, 21.9; HRMS (ESI-TOF)  $m/z$ :  $[\text{M} + \text{H}]^+$  Calcd for  $[\text{C}_{20}\text{H}_{15}\text{ClIN}_2\text{O}_3\text{S}]^+$ : 524.9531; found: 524.9534.

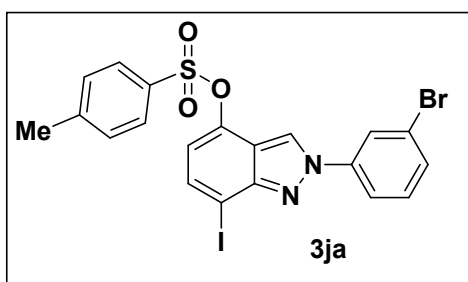

**2-(3-Bromophenyl)-7-iodo-2H-indazol-4-yl 4-methylbenzenesulfonate (3ja):** Brown gummy mass (95 mg, 84%);  $R_f = 0.5$  (PE : EA = 95 : 5);  $^1\text{H NMR}$  ( $\text{CDCl}_3$ , 400 MHz):  $\delta$  8.35 (s, 1H), 8.02 (t,  $J = 2.4$  Hz, 1H), 7.82-7.79 (m, 1H), 7.75 (d,  $J = 8.4$  Hz, 2H), 7.63 (d,  $J = 7.6$  Hz, 1H), 7.56 (d,  $J = 8.0$  Hz, 1H), 7.40 (t,  $J = 8.0$  Hz, 1H), 7.32 (d,  $J = 8.0$  Hz, 2H), 6.39 (d,  $J = 7.6$  Hz, 1H), 2.44 (s, 3H);  $^{13}\text{C}\{^1\text{H}\}$  NMR ( $\text{CDCl}_3$ , 100 MHz):  $\delta$  151.9, 146.0, 142.9, 140.8, 136.1, 132.0, 131.8, 131.0, 130.0, 128.8, 124.4, 123.3, 121.2, 119.8, 117.7, 116.4, 82.3, 21.8; Anal. Calcd for  $\text{C}_{20}\text{H}_{14}\text{BrIN}_2\text{O}_3\text{S}$ : C, 42.20; H, 2.48; N, 4.92%; Found C, 42.04; H, 2.41; N, 4.78%.

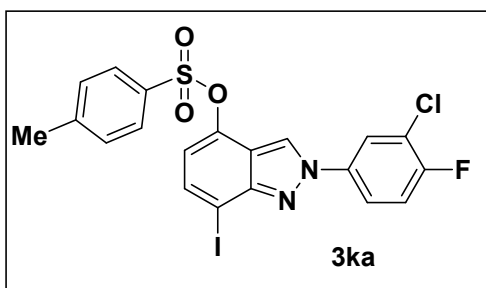

**2-(3-Chloro-4-fluorophenyl)-7-iodo-2H-indazol-4-yl 4-methylbenzenesulfonate (3ka):**

White solid (93 mg, 86%); M.p. 145-146 °C;  $R_f = 0.45$  (PE : EA = 95 : 5);  $^1\text{H NMR}$  ( $\text{CDCl}_3$ , 400 MHz):  $\delta$  8.37 (s, 1H), 7.96-7.94 (m, 1H), 7.78-7.74 (m, 3H), 7.62 (d,  $J = 7.6$  Hz, 1H), 7.34-7.28 (m, 3H), 6.36 (d,  $J = 8.0$  Hz, 1H), 2.44 (s, 3H);  $^{13}\text{C}\{^1\text{H}\}$  NMR ( $\text{CDCl}_3$ , 100 MHz):  $\delta$  158.1 ( $J_{\text{C-F}} = 251$  Hz), 151.9, 146.0, 142.9, 136.5, 136.2, 132.0, 130.0, 128.8, 123.8, 122.5 ( $J_{\text{C-F}} = 19$  Hz), 121.3, 120.9 ( $J_{\text{C-F}} = 7$  Hz), 117.8 ( $J_{\text{C-F}} = 15$  Hz), 117.6 ( $J_{\text{C-F}} = 23$  Hz), 116.4, 82.2, 21.8; Anal. Calcd for  $\text{C}_{20}\text{H}_{13}\text{ClFIN}_2\text{O}_3\text{S}$ : C, 44.26; H, 2.41; N, 5.16%; Found C, 44.07; H, 2.46; N, 5.25%.

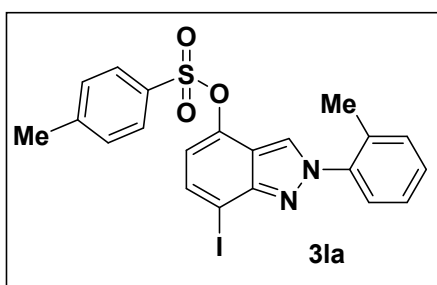

**7-Iodo-2-(*o*-tolyl)-2H-indazol-4-yl 4-methylbenzenesulfonate (3la):** Brown gummy mass (72 mg, 72%);  $R_f = 0.5$  (PE : EA = 96 : 4);  $^1\text{H NMR}$  ( $\text{CDCl}_3$ , 400 MHz):  $\delta$  8.06 (s, 1H), 7.74 (d,  $J = 8.4$  Hz, 2H), 7.65 (d,  $J = 7.6$  Hz, 1H), 7.42-7.40 (m, 1H), 7.39-7.33 (m, 3H), 7.31-7.29 (m, 2H), 6.47 (d,  $J = 7.6$  Hz, 1H), 2.42 (s, 3H), 2.18 (s, 3H);  $^{13}\text{C}\{^1\text{H}\}$  NMR ( $\text{CDCl}_3$ , 100 MHz):  $\delta$  151.4, 145.8, 143.0, 139.7, 135.5, 134.0, 132.2, 131.5, 130.0, 129.8, 128.8, 126.8, 126.6, 125.0, 116.7, 115.9, 82.2, 21.8, 17.9; HRMS (ESI-TOF)  $m/z$ :  $[\text{M} + \text{H}]^+$  Calcd for  $[\text{C}_{21}\text{H}_{18}\text{IN}_2\text{O}_3\text{S}]^+$ : 505.0077; found: 505.0083.

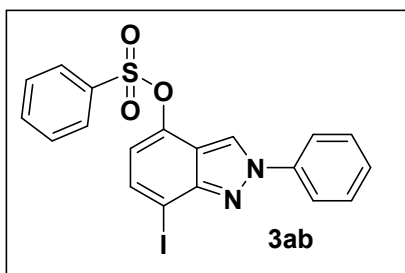

**7-Iodo-2-phenyl-2H-indazol-4-yl benzenesulfonate (3ab):** Brown solid (79 mg, 83%); M.p. 124-125 °C;  $R_f = 0.5$  (PE : EA = 94 : 6);  $^1\text{H NMR}$  ( $\text{CDCl}_3$ , 400 MHz):  $\delta$  8.42 (s, 1H), 7.90-7.85 (m, 4H), 7.68 (t,  $J = 7.6$  Hz, 1H), 7.61 (d,  $J = 7.6$  Hz, 1H), 7.56-7.51 (m, 4H), 7.46-7.42 (m, 1H), 6.37 (d,  $J = 7.6$  Hz, 1H);  $^{13}\text{C}\{^1\text{H}\}$  NMR ( $\text{CDCl}_3$ , 100 MHz):  $\delta$  151.7, 142.9, 139.9, 135.6, 135.1, 134.6, 129.7, 129.4, 128.8, 128.7, 121.4, 121.1, 117.5, 116.0, 82.5; Anal. Calcd for  $\text{C}_{19}\text{H}_{13}\text{IN}_2\text{O}_3\text{S}$ : C, 47.91; H, 2.75; N, 5.88%; Found C, 47.73; H, 2.81; N, 5.74%.

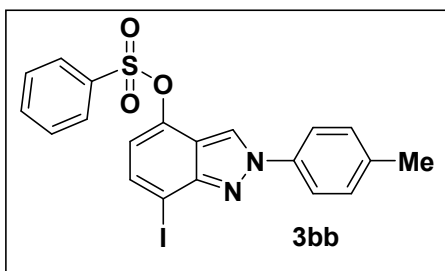

**7-Iodo-2-(p-tolyl)-2H-indazol-4-yl benzenesulfonate (3bb):** Yellow gummy mass (73 mg, 75%);  $R_f = 0.5$  (PE : EA = 95 : 5);  $^1\text{H NMR}$  ( $\text{CDCl}_3$ , 400 MHz):  $\delta$  8.37 (s, 1H), 7.88 (d,  $J = 7.6$  Hz, 2H), 7.43 (d,  $J = 8.4$  Hz, 2H), 7.69-7.65 (m, 1H), 7.60 (d,  $J = 7.6$  Hz, 1H), 7.53 (t,  $J = 8.0$  Hz, 1H), 7.32 (d,  $J = 8.0$  Hz, 2H), 6.36 (d,  $J = 8.0$  Hz, 1H), 2.43 (s, 3H);  $^{13}\text{C}\{^1\text{H}\}$  NMR ( $\text{CDCl}_3$ , 100 MHz):  $\delta$  151.6, 142.9, 139.0, 137.6, 135.5, 135.1, 134.6, 130.2, 129.4, 128.7, 121.2, 120.9, 117.4, 115.9, 82.4, 21.2; Anal. Calcd for  $\text{C}_{20}\text{H}_{15}\text{IN}_2\text{O}_3\text{S}$ : C, 48.99; H, 3.08; N, 5.71%; Found C, 48.77; H, 3.01; N, 5.80%.

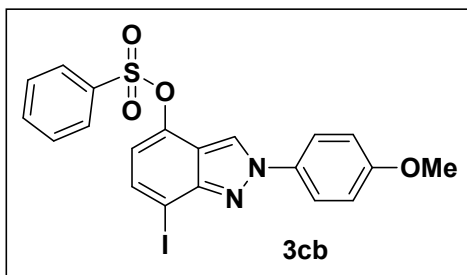

**7-Iodo-2-(4-methoxyphenyl)-2H-indazol-4-yl benzenesulfonate (3cb):** Black gummy mass (71 mg, 71%);  $R_f = 0.45$  (PE : EA = 94 : 6);  $^1\text{H NMR}$  ( $\text{CDCl}_3$ , 400 MHz):  $\delta$  8.33 (s, 1H),



7.90-7.87 (m, 2H), 7.78-7.74 (m, 2H), 7.69-7.66 (m, 1H), 7.59 (d,  $J = 7.6$  Hz, 1H), 7.53 (t,  $J = 8.0$  Hz, 2H), 7.04-7.00 (m, 2H), 6.35 (d,  $J = 8.0$  Hz, 1H), 3.88 (s, 3H);  $^{13}\text{C}\{^1\text{H}\}$  NMR ( $\text{CDCl}_3$ , 100 MHz):  $\delta$  160.0, 142.8, 135.3, 135.1, 134.6, 133.4, 129.4, 128.8, 122.9, 120.9, 115.8, 114.8, 114.6, 111.2, 82.3, 55.8; Anal. Calcd for  $\text{C}_{20}\text{H}_{15}\text{IN}_2\text{O}_4\text{S}$ : C, 47.44; H, 2.99; N, 5.53%; Found C, 47.63; H, 2.91; N, 5.44%.

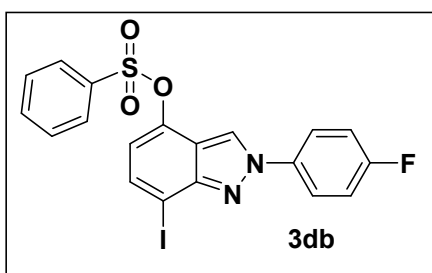

**2-(4-Fluorophenyl)-7-iodo-2H-indazol-4-yl benzenesulfonate (3db):** White solid (75 mg, 76%); M.p 128-129 °C;  $R_f = 0.5$  (PE : EA = 95 : 5);  $^1\text{H}$  NMR ( $\text{CDCl}_3$ , 400 MHz):  $\delta$  8.40 (s, 1H), 7.90-7.83 (m, 4H), 7.69 (t,  $J = 7.6$  Hz, 1H), 7.61 (d,  $J = 7.6$  Hz, 1H), 7.54 (t,  $J = 8.0$  Hz, 2H), 7.25-7.21 (m, 2H), 6.34 (d,  $J = 7.6$  Hz, 1H);  $^{13}\text{C}\{^1\text{H}\}$  NMR ( $\text{CDCl}_3$ , 100 MHz):  $\delta$  162.6 ( $J_{\text{C-F}} = 248$  Hz), 151.8, 142.8 ( $J_{\text{C-F}} = 14$  Hz), 135.8, 135.1, 134.7, 131.5, 129.4, 128.8, 123.3 ( $J_{\text{C-F}} = 9$  Hz), 121.3, 117.6, 116.7 ( $J_{\text{C-F}} = 23$  Hz), 116.1, 82.4; Anal. Calcd for  $\text{C}_{19}\text{H}_{12}\text{FIN}_2\text{O}_3\text{S}$ : C, 46.17; H, 2.45; N, 5.67%; Found C, 46.37; H, 2.50, N, 5.78%.

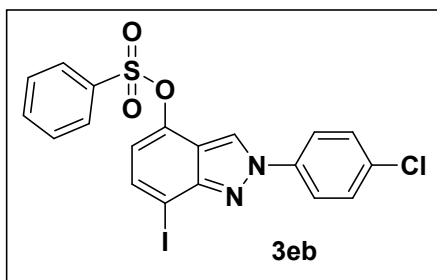

**2-(4-Chlorophenyl)-7-iodo-2H-indazol-4-yl benzenesulfonate (3eb):** Brown solid (79 mg, 78%); M.p 162-163 °C;  $R_f = 0.45$  (PE : EA = 94 : 6);  $^1\text{H}$  NMR ( $\text{CDCl}_3$ , 400 MHz):  $\delta$  8.43 (s, 1H), 7.89 (d,  $J = 7.6$  Hz, 2H), 7.85-7.81 (m, 2H), 7.68 (t,  $J = 7.6$  Hz, 1H), 7.61 (d,  $J = 7.6$  Hz, 1H), 7.56-7.49 (m, 4H), 6.34 (d,  $J = 8.0$  Hz, 1H);  $^{13}\text{C}\{^1\text{H}\}$  NMR ( $\text{CDCl}_3$ , 100 MHz):  $\delta$  151.8, 142.9, 140.4, 138.4, 135.9, 135.0, 134.7, 129.9, 129.4, 128.8, 122.5, 121.1, 117.7, 116.2, 82.4; Anal. Calcd for  $\text{C}_{19}\text{H}_{12}\text{ClIN}_2\text{O}_3\text{S}$ : C, 44.68; H, 2.37; N, 5.49%; Found C, 44.47; H, 2.44; N, 5.39%.

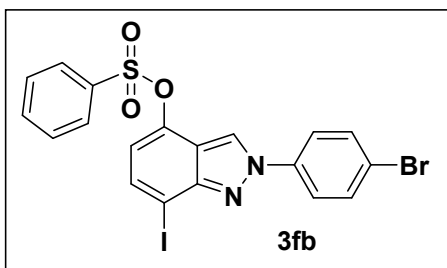

**2-(4-Bromophenyl)-7-iodo-2H-indazol-4-yl benzenesulfonate (3fb):** Brown solid (85 mg, 77%); M.p. 164-165 °C;  $R_f = 0.5$  (PE : EA = 95 : 5);  $^1\text{H NMR}$  ( $\text{CDCl}_3$ , 400 MHz):  $\delta$  8.43 (s, 1H), 7.90-7.88 (m, 2H), 7.79-7.75 (m, 2H), 7.70-7.64 (m, 3H), 7.61 (d,  $J = 8.0$  Hz, 1H), 7.56-7.52 (m, 2H), 6.34 (d,  $J = 7.6$  Hz, 1H);  $^{13}\text{C}\{^1\text{H}\}$  NMR ( $\text{CDCl}_3$ , 100 MHz):  $\delta$  151.9, 142.9, 138.9, 136.0, 135.0, 134.7, 132.9, 129.4, 128.8, 122.7, 122.6, 121.0, 117.7, 116.2, 82.4; Anal. Calcd for  $\text{C}_{19}\text{H}_{12}\text{BrIN}_2\text{O}_3\text{S}$ : C, 41.11; H, 2.18; N, 5.05%; Found C, 41.30; H, 2.10; N, 5.17%.

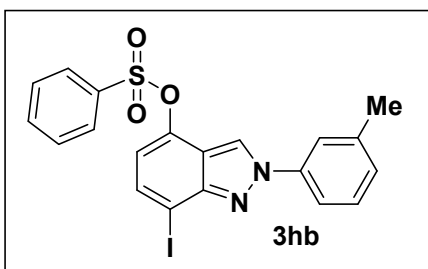

**7-Iodo-2-(*m*-tolyl)-2H-indazol-4-yl benzenesulfonate (3hb):** Black solid (65 mg, 67%); M.p. 96-97 °C;  $R_f = 0.6$  (PE : EA = 96 : 4);  $^1\text{H NMR}$  ( $\text{CDCl}_3$ , 400 MHz):  $\delta$  8.40 (s, 1H), 7.90-7.88 (m, 2H), 7.69-7.66 (m, 2H), 7.63-7.59 (m, 2H), 7.56-7.52 (m, 2H), 7.40 (t,  $J = 8.0$  Hz, 1H), 7.23 (s, 1H), 6.36 (d,  $J = 7.6$  Hz, 1H), 2.47 (s, 3H);  $^{13}\text{C}\{^1\text{H}\}$  NMR ( $\text{CDCl}_3$ , 100 MHz):  $\delta$  151.7, 142.9, 140.0, 139.8, 135.6, 135.1, 134.6, 129.6, 129.5, 129.4, 128.7, 122.1, 121.2, 118.5, 117.4, 115.9, 82.5, 21.6; Anal. Calcd for  $\text{C}_{20}\text{H}_{15}\text{IN}_2\text{O}_3\text{S}$ : C, 48.99; H, 3.08; N, 5.71%; Found C, 48.79; H, 3.13; N, 5.62%.

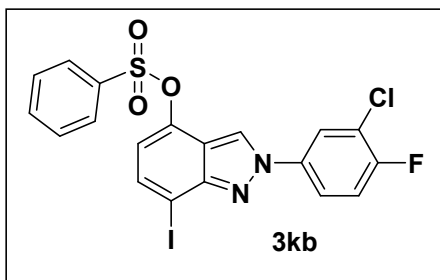

**2-(3-Chloro-4-fluorophenyl)-7-iodo-2H-indazol-4-yl benzenesulfonate (3kb):** Grey solid (84 mg, 80%); M.p. 207-208 °C;  $R_f = 0.5$  (PE : EA = 95 : 5);  $^1\text{H NMR}$  ( $\text{CDCl}_3$ , 400 MHz):  $\delta$  8.40 (s, 1H), 8.00-7.97 (m, 1H), 7.90-7.88 (m, 2H), 7.77-7.74 (m, 1H), 7.72-7.68 (m, 1H), 7.62 (d,  $J = 7.6$  Hz, 1H), 7.55 (t,  $J = 8.0$  Hz, 2H), 7.31 (t,  $J = 7.6$  Hz, 1H), 6.34 (d,  $J = 7.6$  Hz, 1H);  $^{13}\text{C}\{^1\text{H}\}$  NMR ( $\text{CDCl}_3$ , 100 MHz):  $\delta$  158.1 ( $J_{\text{C-F}} = 250$  Hz), 151.9, 142.8, 136.5, 136.1, 135.0, 134.9, 134.7, 129.4, 128.8, 123.9, 121.4, 120.9 ( $J_{\text{C-F}} = 8$  Hz), 117.8 ( $J_{\text{C-F}} = 10$  Hz), 117.6 ( $J_{\text{C-F}} = 23$  Hz), 116.4, 82.4; Anal. Calcd for  $\text{C}_{19}\text{H}_{11}\text{ClFIN}_2\text{O}_3\text{S}$ : C, 43.16; H, 2.10; N, 5.30%; Found C, 43.33; H, 2.04; N, 5.43%.

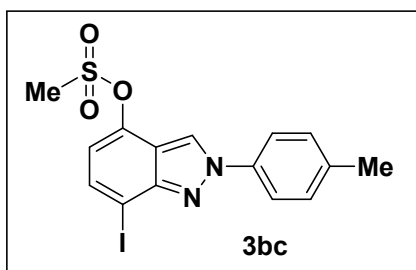

**7-Iodo-2-(p-tolyl)-2H-indazol-4-yl methanesulfonate (3bc):** Brown solid (63 mg, 74%); M.p. 102-103 °C;  $R_f = 0.4$  (PE : EA = 92 : 8);  $^1\text{H NMR}$  ( $\text{CDCl}_3$ , 400 MHz):  $\delta$  8.67 (s, 1H), 7.81 (d,  $J = 7.6$  Hz, 2H), 7.75 (d,  $J = 7.6$  Hz, 1H), 7.33 (d,  $J = 8.4$  Hz, 2H), 6.80 (d,  $J = 7.6$  Hz, 1H), 3.24 (s, 3H), 2.43 (s, 3H);  $^{13}\text{C}\{^1\text{H}\}$  NMR ( $\text{CDCl}_3$ , 100 MHz):  $\delta$  142.6, 139.1, 137.7, 135.6, 130.3, 129.2, 121.4, 117.3, 116.3, 115.2, 82.6, 37.7, 21.2; Anal. Calcd for  $\text{C}_{15}\text{H}_{13}\text{IN}_2\text{O}_3\text{S}$ : C, 42.07; H, 3.06; N, 6.54%; Found C, 41.89; H, 3.11; N, 6.44%.

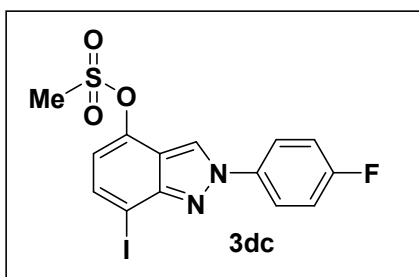

**2-(4-Fluorophenyl)-7-iodo-2H-indazol-4-yl methanesulfonate (3dc):** Grey solid (71 mg, 83%); M.p. 158-159 °C;  $R_f = 0.45$  (PE : EA = 93 : 7);  $^1\text{H NMR}$  ( $\text{CDCl}_3$ , 400 MHz):  $\delta$  8.65 (s, 1H), 7.93-7.90 (m, 2H), 7.77 (d,  $J = 8.0$  Hz, 1H), 7.25-7.21 (m, 2H), 6.81 (d,  $J = 8.0$  Hz, 1H), 3.26 (s, 3H);  $^{13}\text{C}\{^1\text{H}\}$  NMR ( $\text{CDCl}_3$ , 100 MHz):  $^{13}\text{C}\{^1\text{H}\}$  NMR ( $\text{CDCl}_3$ , 100 MHz):  $\delta$  162.7 ( $J_{\text{C-F}} = 248$  Hz), 142.5, 135.9, 131.2, 123.4 ( $J_{\text{C-F}} = 8$  Hz), 121.5, 117.7, 117.5, 116.7 ( $J_{\text{C-F}} = 23$  Hz), 115.4 ( $J_{\text{C-F}} = 14$  Hz), 82.6, 37.7; Anal. Calcd for  $\text{C}_{14}\text{H}_{10}\text{FIN}_2\text{O}_3\text{S}$ : C, 38.91; H, 2.33; N, 6.48%; Found C, 39.13; H, 2.26; N, 6.59%.

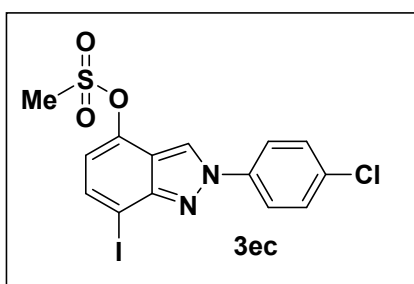

**2-(4-Chlorophenyl)-7-iodo-2H-indazol-4-yl methanesulfonate (3ec):** Brown solid (78 mg, 88%); M.p. 151-152 °C;  $R_f = 0.4$  (PE : EA = 90 : 10);  $^1\text{H NMR}$  ( $\text{CDCl}_3$ , 400 MHz):  $\delta$  8.68 (s, 1H), 7.91-7.88 (m, 2H), 7.77 (d,  $J = 8.0$  Hz, 1H), 7.53-7.49 (m, 2H), 6.80 (d,  $J = 8.0$  Hz, 1H), 3.26 (s, 3H);  $^{13}\text{C}\{^1\text{H}\}$  NMR ( $\text{CDCl}_3$ , 100 MHz):  $\delta$  152.0, 142.5, 138.4, 136.0, 134.7, 129.9, 122.6, 121.3, 117.6, 115.6, 82.7, 37.7; Anal. Calcd for  $\text{C}_{14}\text{H}_{10}\text{ClIN}_2\text{O}_3\text{S}$ : C, 37.48; H, 2.25; N, 6.24%; Found C, 37.27; H, 2.20; N, 6.36%.

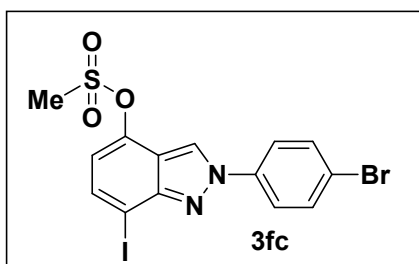

**2-(4-Bromophenyl)-7-iodo-2H-indazol-4-yl methanesulfonate (3fc):** Brown solid (80 mg, 82%); M.p. 161-162 °C;  $R_f = 0.45$  (PE : EA = 92 : 8);  $^1\text{H NMR}$  ( $\text{CDCl}_3$ , 400 MHz):  $\delta$  8.69

(s, 1H), 7.85-7.82 (m, 2H), 7.77 (d,  $J = 7.6$  Hz, 1H), 7.68-7.65 (m, 2H), 6.81 (d,  $J = 7.6$  Hz, 1H), 3.26 (s, 3H);  $^{13}\text{C}\{^1\text{H}\}$  NMR ( $\text{CDCl}_3$ , 100 MHz):  $\delta$  152.0, 142.5, 138.9, 136.0, 132.9, 122.8, 122.7, 121.3, 117.6, 115.6, 82.7, 37.7; Anal. Calcd for  $\text{C}_{14}\text{H}_{10}\text{BrIN}_2\text{O}_3\text{S}$ : C, 34.10; H, 2.04; N, 5.68%; Found C, 33.83; H, 2.12; N, 5.59%.

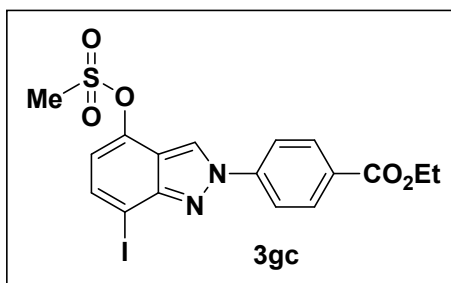

**Ethyl 4-(7-iodo-4-((methylsulfonyl)oxy)-2H-indazol-2-yl)benzoate (3gc):** Brown solid (66 mg, 68%); M.p. 160-161 °C;  $R_f = 0.4$  (PE : EA = 88 : 12);  $^1\text{H}$  NMR ( $\text{CDCl}_3$ , 400 MHz):  $\delta$  8.78 (s, 1H), 8.22 (d,  $J = 8.8$  Hz, 2H), 8.05 (d,  $J = 8.8$  Hz, 2H), 7.79 (d,  $J = 8.0$  Hz, 1H), 6.82 (d,  $J = 7.6$  Hz, 1H), 4.43 (q,  $J = 7.2$  Hz, 2H), 3.27 (s, 3H), 1.43 (t,  $J = 7.2$  Hz, 3H);  $^{13}\text{C}\{^1\text{H}\}$  NMR ( $\text{CDCl}_3$ , 100 MHz):  $\delta$  165.6, 142.9, 142.5, 136.3, 131.3, 130.7, 121.67, 121.62, 120.9, 117.7, 115.8, 82.8, 61.5, 37.8, 14.4; Anal. Calcd for  $\text{C}_{17}\text{H}_{15}\text{IN}_2\text{O}_5\text{S}$ : C, 41.99; H, 3.11; N, 5.76%; Found C, 42.15; H, 3.05; N, 5.64%.

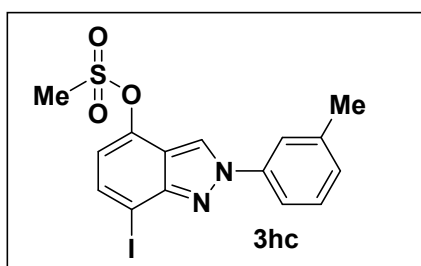

**7-Iodo-2-(m-tolyl)-2H-indazol-4-yl methanesulfonate (3hc):** Yellow solid (56 mg, 66%); M.p. 120-121 °C;  $R_f = 0.45$  (PE : EA = 92 : 8);  $^1\text{H}$  NMR ( $\text{CDCl}_3$ , 400 MHz):  $\delta$  8.69 (s, 1H), 7.77-7.75 (m, 2H), 7.71 (d,  $J = 8.0$  Hz, 1H), 7.41 (t,  $J = 8.0$  Hz, 1H), 7.26-7.24 (m, 1H), 6.81 (d,  $J = 8.0$  Hz, 1H), 3.25 (s, 3H), 2.47 (s, 3H),  $^{13}\text{C}\{^1\text{H}\}$  NMR ( $\text{CDCl}_3$ , 100 MHz): 142.6, 140.0, 139.9, 135.7, 129.7, 129.6, 122.2, 121.6, 121.4, 118.6, 117.3, 115.3, 82.7, 37.7, 21.6; Anal. Calcd for  $\text{C}_{15}\text{H}_{13}\text{IN}_2\text{O}_3\text{S}$ : C, 42.07; H, 3.06; N, 6.54%; Found C, 41.85; H, 2.99; N, 6.68%.

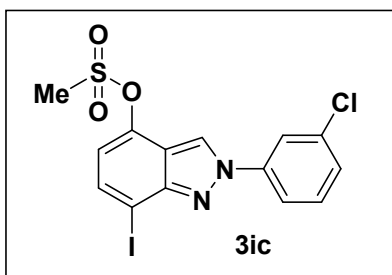

**2-(3-Chlorophenyl)-7-iodo-2H-indazol-4-yl methanesulfonate (3ic):** Brown solid (69 mg, 77%); M.p. 146-147 °C;  $R_f = 0.45$  (PE : EA = 92 : 8);  $^1\text{H}$  NMR ( $\text{CDCl}_3$ , 400 MHz):  $\delta$  8.70 (s, 1H), 8.00 (t,  $J = 2.0$  Hz, 1H), 7.84-7.81 (m, 1H), 7.78 (d,  $J = 8.0$  Hz, 1H), 7.48 (t,  $J = 8.0$  Hz, 1H), 7.43-7.41 (m, 1H), 6.81 (d,  $J = 7.6$  Hz, 1H), 3.26 (s, 3H);  $^{13}\text{C}\{^1\text{H}\}$  NMR ( $\text{CDCl}_3$ , 100 MHz): 152.0, 142.5, 139.0, 136.1, 130.8, 129.0, 127.4, 121.8, 121.5, 119.4, 117.6, 115.7, 82.8, 37.7; HRMS (ESI-TOF)  $m/z$ :  $[\text{M} + \text{H}]^+$  Calcd for  $[\text{C}_{14}\text{H}_{11}\text{ClIN}_2\text{O}_3\text{S}]^+$ : 448.9218; found: 448.9221.

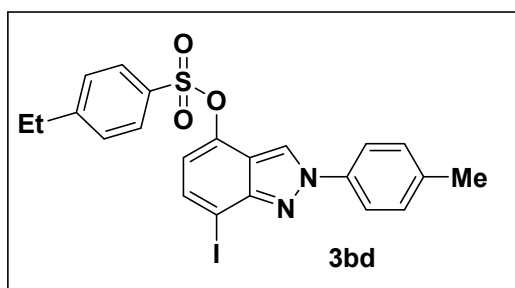

**7-Iodo-2-(p-tolyl)-2H-indazol-4-yl 4-ethylbenzenesulfonate (3bd):** Brown gummy mass (86 mg, 83%);  $R_f = 0.50$  (PE : EA = 96 : 4);  $^1\text{H}$  NMR ( $\text{CDCl}_3$ , 400 MHz):  $\delta$  8.29 (s, 1H), 7.78 (d,  $J = 8.0$  Hz, 2H), 7.71 (d,  $J = 8.4$  Hz, 2H), 7.61 (d,  $J = 8.0$  Hz, 1H), 7.34-7.29 (m, 4H), 6.41 (d,  $J = 8.0$  Hz, 1H), 2.71 (q,  $J = 7.6$  Hz, 2H), 2.42 (s, 3H), 1.22 (t,  $J = 7.6$  Hz, 3H);  $^{13}\text{C}\{^1\text{H}\}$  NMR ( $\text{CDCl}_3$ , 100 MHz): 152.0, 151.6, 143.0, 138.9, 137.6, 135.6, 132.4, 130.2, 128.9, 128.8, 121.2, 120.9, 117.5, 116.0, 82.2, 29.0, 21.2, 15.0; Anal. Calcd for  $\text{C}_{22}\text{H}_{19}\text{IN}_2\text{O}_3\text{S}$ : C, 50.98; H, 3.69; N, 5.40%; Found C, 51.18; H, 3.76; N, 5.26%.

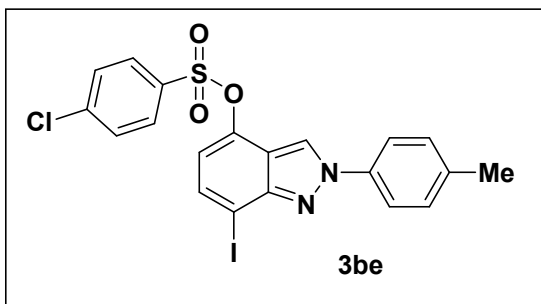

**7-Iodo-2-(*p*-tolyl)-2*H*-indazol-4-yl 4-chlorobenzenesulfonate (3be):** Brown solid (71 mg, 68%); M.p. 131-132 °C;  $R_f = 0.5$  (PE : EA = 95 : 5);  $^1\text{H NMR}$  ( $\text{CDCl}_3$ , 400 MHz):  $\delta$  8.39 (s, 1H), 7.83-7.80 (m, 2H), 7.73 (d,  $J = 8.8$  Hz, 2H), 7.61 (d,  $J = 8.0$  Hz, 1H), 7.53-7.49 (m, 2H), 7.33 (d,  $J = 8.0$  Hz, 2H), 6.35 (d,  $J = 7.6$  Hz, 1H), 2.43 (s, 3H);  $^{13}\text{C}\{^1\text{H}\}$  NMR ( $\text{CDCl}_3$ , 100 MHz): 151.7, 142.7, 141.6, 139.1, 137.6, 135.4, 133.5, 131.8, 130.3, 130.2, 129.8, 121.3, 120.9, 115.8, 82.7, 21.2; Anal. Calcd for  $\text{C}_{20}\text{H}_{14}\text{ClIN}_2\text{O}_3\text{S}$ : C, 45.78; H, 2.69; N, 5.34%; Found C, 45.57; H, 2.75; N, 5.47%.

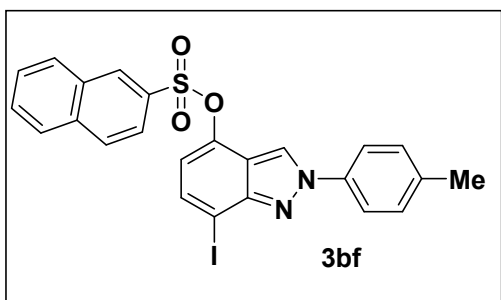

**7-Iodo-2-(*p*-tolyl)-2*H*-indazol-4-yl naphthalene-2-sulfonate (3bf):** Brown gummy mass (61 mg, 57%);  $R_f = 0.5$  (PE : EA = 95 : 5);  $^1\text{H NMR}$  ( $\text{CDCl}_3$ , 400 MHz):  $\delta$  8.44 (s, 1H), 8.21 (s, 1H), 7.99 (d,  $J = 8.8$  Hz, 1H), 7.94 (d,  $J = 8.8$  Hz, 2H), 7.89-7.86 (m, 1H), 7.74-7.72 (m, 1H), 7.70-7.62 (m, 1H), 7.57 (d,  $J = 8.0$  Hz, 1H), 7.51 (d,  $J = 8.4$  Hz, 2H), 7.24 (d,  $J = 8.4$  Hz, 2H), 6.34 (d,  $J = 8.0$  Hz, 1H), 2.41 (s, 3H);  $^{13}\text{C}\{^1\text{H}\}$  NMR ( $\text{CDCl}_3$ , 100 MHz): 156.8, 148.9, 142.9, 138.9, 135.6, 135.5, 132.1, 131.9, 130.8, 130.2, 130.0, 129.79, 129.70, 128.2, 128.1, 123.1, 121.2, 120.9, 117.4, 116.1, 82.4, 21.2; Anal. Calcd for  $\text{C}_{24}\text{H}_{17}\text{IN}_2\text{O}_3\text{S}$ : C, 53.35; H, 3.17; N, 5.18%; Found C, 53.16; H, 3.22; N, 5.07%.

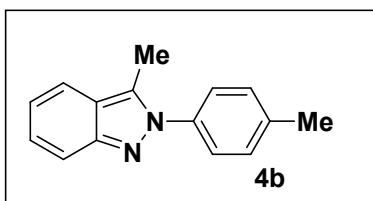

**3-Methyl-2-(*p*-tolyl)-2*H*-indazole (4b):** Yellow gummy mass (689 mg, 62%);  $R_f = 0.6$  (PE : EA = 97 : 3);  $^1\text{H}$  NMR ( $\text{CDCl}_3$ , 400 MHz):  $\delta$  7.72 (d,  $J = 8.8$  Hz, 2H), 7.61 (d,  $J = 8.4$  Hz, 1H), 7.44 (d,  $J = 8.4$  Hz, 2H), 7.33-7.29 (m, 3H), 7.09-7.05 (m, 1H), 2.62 (s, 3H), 2.45 (s, 3H);  $^{13}\text{C}\{^1\text{H}\}$  NMR ( $\text{CDCl}_3$ , 100 MHz): 148.5, 138.7, 137.5, 131.9, 129.8, 126.7, 125.5, 121.6, 120.8, 120.0, 117.5, 21.2, 11.1; Anal. Calcd for  $\text{C}_{15}\text{H}_{14}\text{N}_2$ : C, 81.05; H, 6.35; N, 12.60%; Found C, 81.27; H, 6.43; N, 12.46%.

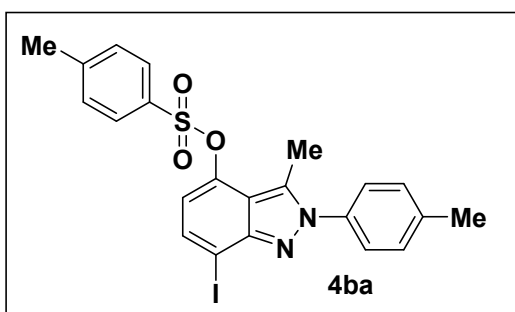

**7-Iodo-3-methyl-2-(*p*-tolyl)-2*H*-indazol-4-yl 4-methylbenzenesulfonate (4ba):** Black gummy mass (66 mg, 64%);  $R_f = 0.55$  (PE : EA = 96 : 4);  $^1\text{H}$  NMR ( $\text{CDCl}_3$ , 400 MHz):  $\delta$  7.79 (d,  $J = 8.4$  Hz, 2H), 7.55 (d,  $J = 8.0$  Hz, 1H), 7.39-7.31 (m, 6H), 6.21 (d,  $J = 7.6$  Hz, 1H), 2.63 (s, 3H), 2.47 (s, 3H), 2.44 (s, 3H);  $^{13}\text{C}\{^1\text{H}\}$  NMR ( $\text{CDCl}_3$ , 100 MHz): 151.7, 150.8, 146.9, 145.9, 144.3, 139.6, 136.6, 135.2, 132.6, 130.0, 129.9, 128.8, 126.2, 114.1, 82.1, 21.9, 21.3, 12.9; Anal. Calcd for  $\text{C}_{22}\text{H}_{19}\text{IN}_2\text{O}_3\text{S}$ : C, 50.98; H, 3.69; N, 5.40%; Found C, 50.78; H, 3.62; N, 5.52%.

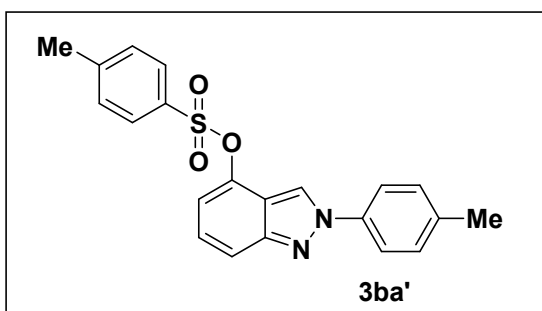

**2-(*p*-tolyl)-2*H*-indazol-4-yl 4-methylbenzenesulfonate (3ba'):** Yellow gummy mass (59 mg, 78%);  $R_f = 0.45$  (PE : EA = 95 : 5);  $^1\text{H}$  NMR ( $\text{CDCl}_3$ , 400 MHz):  $\delta$  8.18 (s, 1H), 7.76 (d,



$J = 8.4$  Hz, 2H), 7.69 (d,  $J = 8.4$  Hz, 2H), 7.65 (d,  $J = 8.8$  Hz, 1H), 7.32-7.29 (m, 4H), 7.16-7.12 (m, 1H), 6.59 (d,  $J = 7.2$  Hz, 1H), 2.429 (s, 3H), 2.424 (s, 3H);  $^{13}\text{C}\{^1\text{H}\}$  NMR ( $\text{CDCl}_3$ , 100 MHz): 151.2, 145.7, 142.1, 138.6, 137.9, 132.5, 130.2, 129.9, 128.8, 126.3, 121.0, 119.3, 118.4, 117.2, 114.6, 21.8, 21.2; Anal. Calcd for  $\text{C}_{21}\text{H}_{18}\text{N}_2\text{O}_3\text{S}$ : C, 66.65; H, 4.79; N, 7.40%; Found C, 66.82; H, 4.87; N, 7.26%.

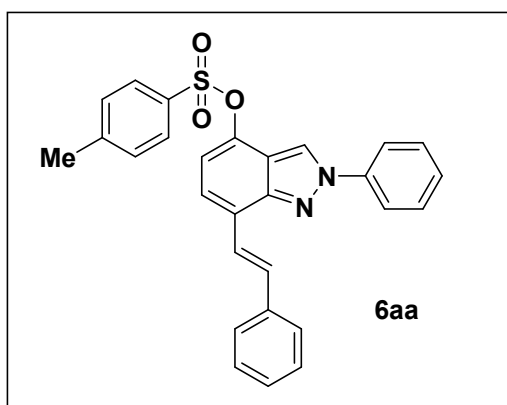

**(E)-2-Phenyl-7-styryl-2H-indazol-4-yl 4-methylbenzenesulfonate (6aa):** Yellow gummy mass (92 mg, 79%);  $R_f = 0.7$  (PE : EA = 97 : 3);  $^1\text{H}$  NMR ( $\text{CDCl}_3$ , 400 MHz):  $\delta$  8.24 (s, 1H), 8.11 (d,  $J = 16.4$  Hz, 1H), 7.91-7.89 (m, 2H), 7.78 (d,  $J = 8.4$  Hz, 2H), 7.62 (d,  $J = 7.2$  Hz, 2H), 7.58-7.47 (m, 2H), 7.46-7.36 (m, 4H), 7.32-7.27 (m, 3H), 7.21 (d,  $J = 8.0$  Hz, 1H), 6.62 (d,  $J = 8.0$  Hz, 1H), 2.42 (s, 3H);  $^{13}\text{C}\{^1\text{H}\}$  NMR ( $\text{CDCl}_3$ , 100 MHz): 149.0, 145.7, 141.2, 140.2, 138.0, 133.1, 132.4, 129.9, 129.7, 128.8, 128.7, 128.4, 127.8, 127.2, 126.9, 125.5, 125.1, 121.0, 119.4, 119.1, 115.2, 21.8; Anal. Calcd for  $\text{C}_{28}\text{H}_{22}\text{N}_2\text{O}_3\text{S}$ : C, 72.08; H, 4.75; N, 6.00%; Found C, 72.30; H, 4.67; N, 6.12%.

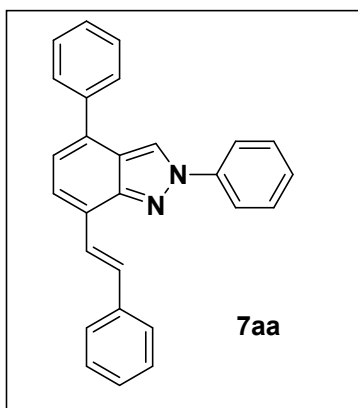

**(E)-2,4-Diphenyl-7-styryl-2H-indazole (7aa):** Yellow solid (26 mg, 70%); M.p. 90-91 °C;  $R_f = 0.8$  (PE : EA = 98 : 2);  $^1\text{H}$  NMR ( $\text{CDCl}_3$ , 400 MHz):  $\delta$  8.61 (s, 1H), 8.26 (d,  $J = 16.0$  Hz, 1H), 8.02-8.00 (m, 2H), 7.74-7.72 (m, 2H), 7.68 (d,  $J = 7.6$  Hz, 2H), 7.60-7.48 (m, 6H), 7.44-

7.38 (m, 4H), 7.28 (d,  $J = 7.6$  Hz, 1H), 7.21 (d,  $J = 7.2$  Hz, 1H);  $^{13}\text{C}\{^1\text{H}\}$  NMR ( $\text{CDCl}_3$ , 100 MHz): 140.6, 140.3, 138.4, 134.0, 132.4, 129.7, 129.0, 128.7, 128.2, 128.0, 127.8, 127.5, 126.9, 126.8, 126.6, 126.0, 123.1, 122.0, 121.08, 121.02, 120.8; Anal. Calcd for  $\text{C}_{27}\text{H}_{20}\text{N}_2$ : C, 87.07; H, 5.41; N, 7.52%; Found C, 86.86; H, 5.48; N, 7.39%.

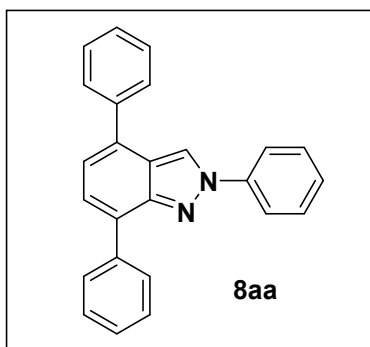

**2,4,7-triphenyl-2H-indazole (8aa):** White solid (42 mg, 62%); M.p. 82–83 °C;  $R_f = 0.85$  (PE : EA = 98.5 : 1.5);  $^1\text{H}$  NMR ( $\text{CDCl}_3$ , 400 MHz):  $\delta$  8.63 (s, 1H), 8.19–8.17 (m, 2H), 7.98–7.95 (m, 2H), 7.77–7.75 (m, 2H), 7.59–7.50 (m, 7H), 7.44–7.39 (m, 3H), 7.29 (d,  $J = 7.2$  Hz, 1H);  $^{13}\text{C}\{^1\text{H}\}$  NMR ( $\text{CDCl}_3$ , 100 MHz): 148.5, 140.6, 140.3, 138.2, 134.0, 130.0, 129.6, 129.1, 129.0, 128.5, 128.2, 128.0, 127.8, 127.7, 125.9, 123.3, 122.0, 121.1, 120.7; Anal. Calcd for  $\text{C}_{25}\text{H}_{18}\text{N}_2$ : C, 86.68; H, 5.24; N, 8.09%; Found C, 86.49; H, 5.19; N, 8.23%.

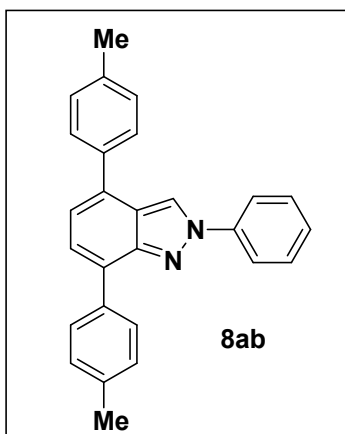

**2-Phenyl-4,7-di-*p*-tolyl-2H-indazole (8ab):** White solid (50 mg, 68%); M.p. 157–158 °C;  $R_f = 0.80$  (PE : EA = 98 : 2);  $^1\text{H}$  NMR ( $\text{CDCl}_3$ , 400 MHz):  $\delta$  8.61 (s, 1H), 8.06 (d,  $J = 8.0$  Hz, 2H), 7.95 (d,  $J = 7.6$  Hz, 2H), 7.65 (d,  $J = 8.0$  Hz, 2H), 7.55–7.49 (m, 3H), 7.40–7.33 (m, 5H), 7.25 (d,  $J = 7.2$  Hz, 1H), 2.45 (s, 3H), 2.44 (s, 3H);  $^{13}\text{C}\{^1\text{H}\}$  NMR ( $\text{CDCl}_3$ , 100 MHz): 148.6, 142.0, 140.7, 137.6, 137.5, 137.4, 135.3, 133.6, 129.7, 129.6, 129.3, 128.9, 128.0, 127.9,

125.5, 123.3, 121.8, 121.0, 120.7, 21.46, 21.42; Anal. Calcd for C<sub>27</sub>H<sub>22</sub>N<sub>2</sub>: C, 86.60; H, 5.92; N, 7.48%; Found C, 86.97; H, 5.84; N, 7.61%.

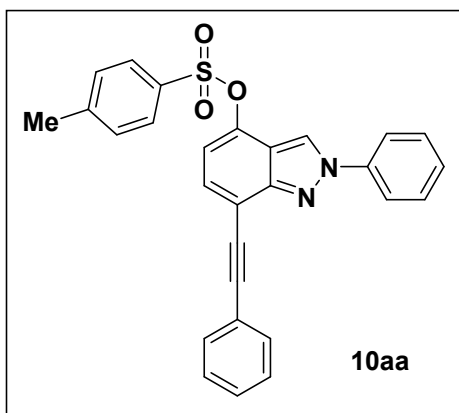

**2-Phenyl-7-(phenylethynyl)-2H-indazol-4-yl 4-methylbenzenesulfonate (10aa):** Brown gummy mass (77 mg, 83%);  $R_f = 0.5$  (PE : EA = 96 : 4); <sup>1</sup>H NMR (CDCl<sub>3</sub>, 400 MHz):  $\delta$  8.25 (s, 1H), 7.88 (d,  $J = 7.6$  Hz, 2H), 7.65-7.63 (m, 2H), 7.53 (t,  $J = 8.0$  Hz, 2H), 7.44-7.35 (m, 5H), 7.29 (d,  $J = 8.0$  Hz, 2H), 6.63 (d,  $J = 7.6$  Hz, 1H), 2.40 (s, 3H); <sup>13</sup>C{<sup>1</sup>H} NMR (CDCl<sub>3</sub>, 100 MHz): 150.7, 145.9, 142.2, 140.0, 132.0, 131.9, 130.7, 129.9, 129.7, 128.8, 128.67, 128.63, 128.4, 123.2, 121.2, 120.2, 118.3, 114.9, 112.5, 95.0, 85.3, 21.8; Anal. Calcd for C<sub>28</sub>H<sub>20</sub>N<sub>2</sub>O<sub>3</sub>S: C, 72.40; H, 4.34; N, 6.03%; Found C, 72.61; H 4.27; N, 6.16%.

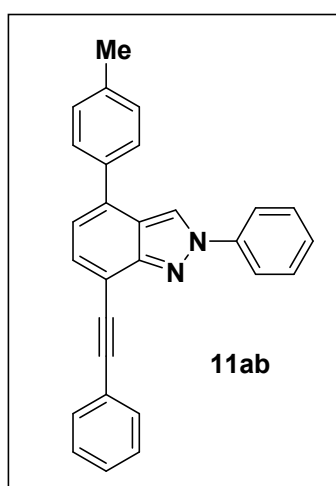

**2-Phenyl-7-(phenylethynyl)-4-(p-tolyl)-2H-indazole (11ab):** White Solid (24 mg, 64%); M.p. 120-121 °C;  $R_f = 0.8$  (PE : EA = 98 : 2); <sup>1</sup>H NMR (CDCl<sub>3</sub>, 400 MHz):  $\delta$  8.60 (s, 1H), 8.00-7.98 (m, 2H), 7.70-7.68 (m, 2H), 7.65-7.62 (m, 3H), 7.55-7.51 (m, 2H), 7.42-7.32 (m, 6H), 7.18 (d,  $J = 7.2$  Hz, 1H), 2.45 (s, 3H); <sup>13</sup>C{<sup>1</sup>H} NMR (CDCl<sub>3</sub>, 100 MHz): 150.1, 140.5,

138.1, 137.1, 135.5, 132.0, 131.7, 129.8, 129.6, 128.3, 128.2, 128.0, 126.9, 123.8, 122.3, 121.6, 121.3, 121.2, 111.7, 94.6, 86.6, 21.4; Anal. Calcd for  $C_{28}H_{20}N_2$ : C, 87.47; H, 5.24; N, 7.29%; Found C, 87.25; H, 5.32; N, 7.17%.

## 10. References:

1. (a) M. R. Kumar, A. Park, N. Park and S. Lee, *Org. Lett.*, 2011, **13**, 3542-3545; (b) P. Ghosh, S. Mondal and A. Hajra, *J. Org. Chem.*, 2018, **83**, 13618-13623.
2. M. S. Yusubov and T. Wirth, *Org. Lett.*, 2005, **7**, 519-521.

## **11. NMR spectra [ $^1\text{H}$ , and $^{13}\text{C}\{^1\text{H}\}$ ] of synthesized products**

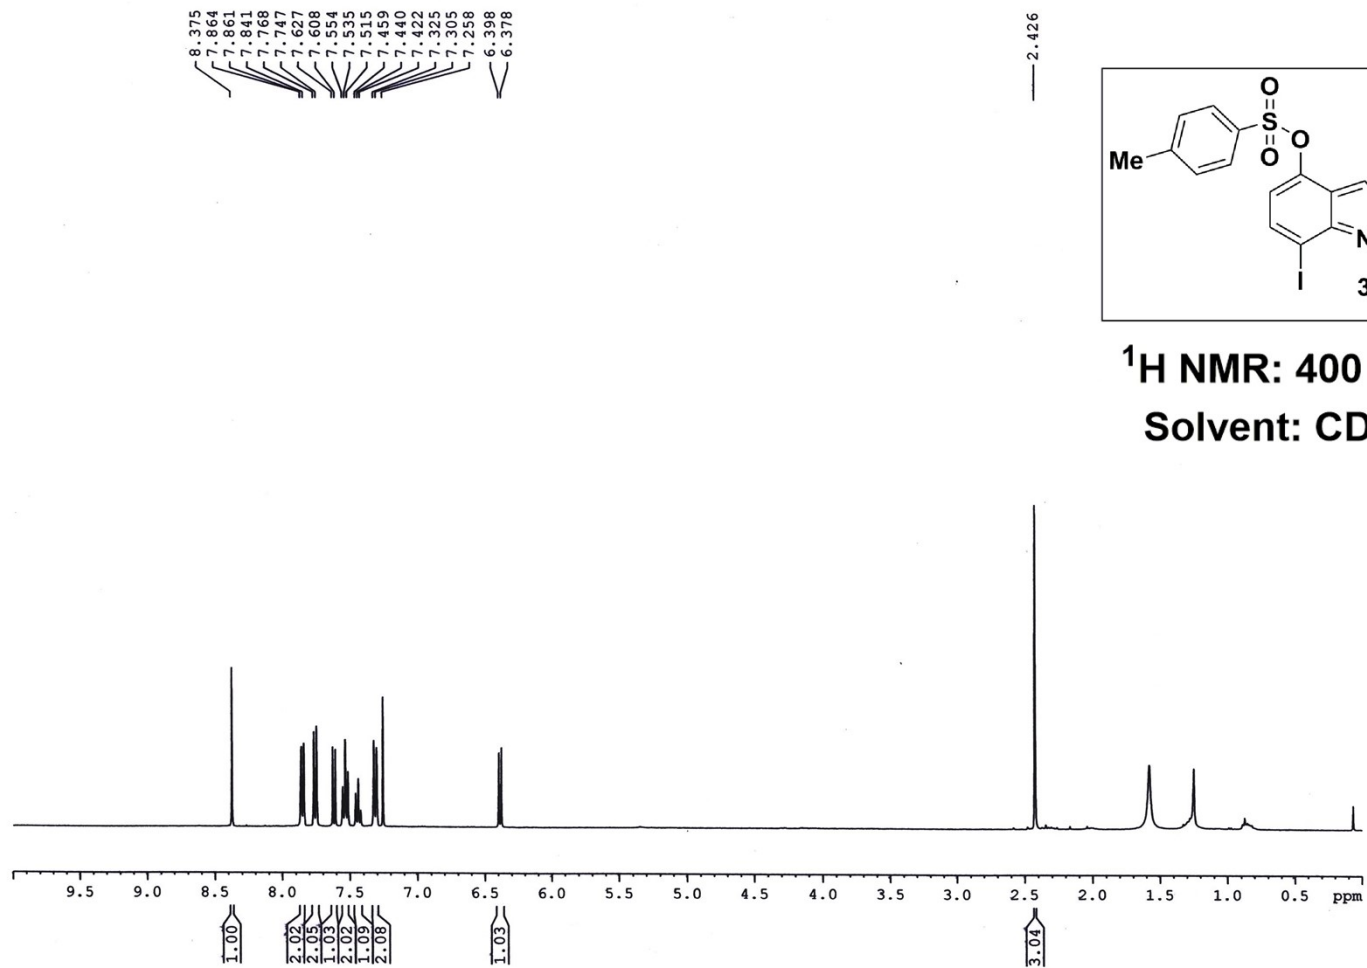

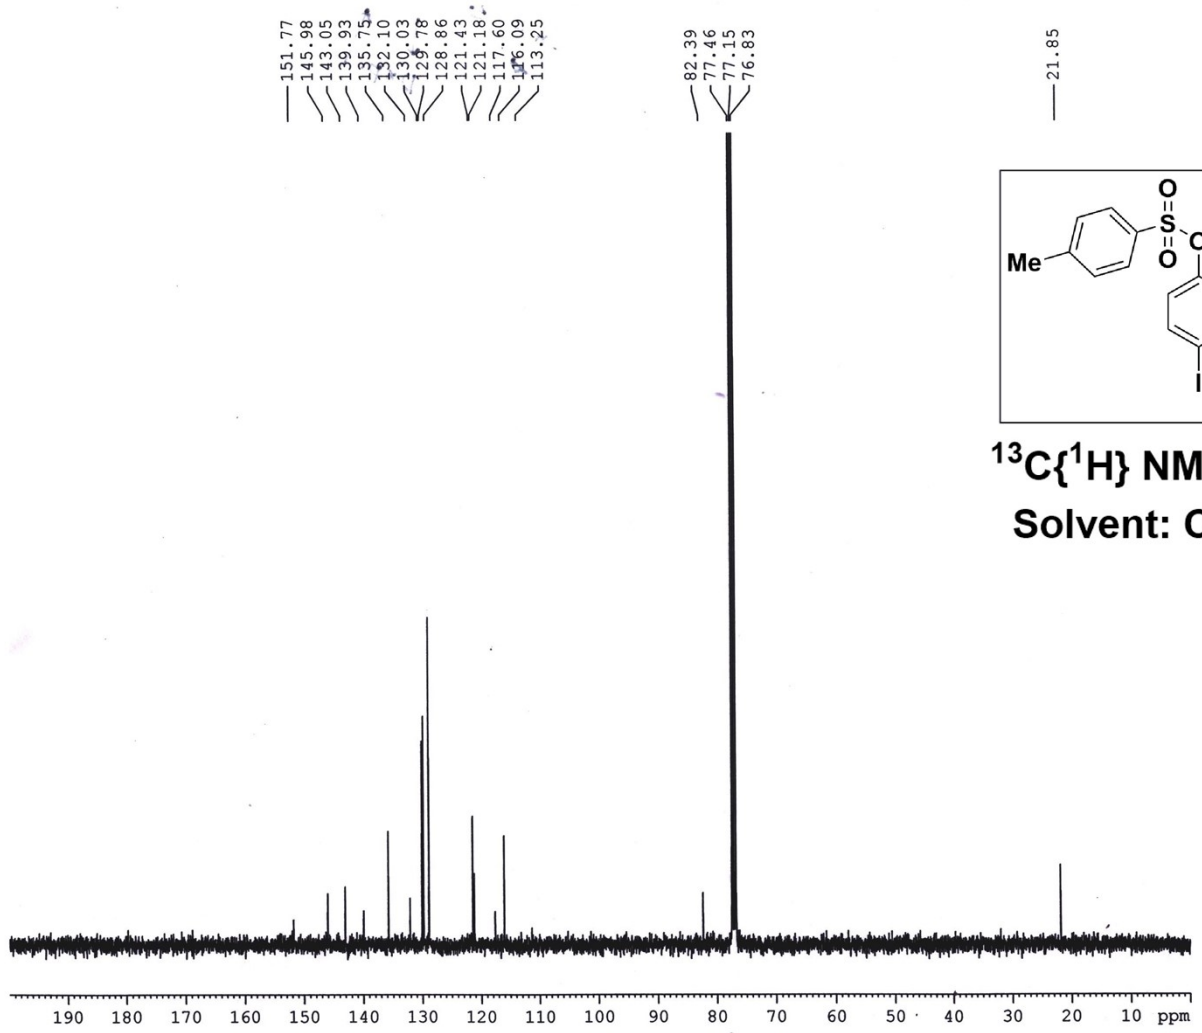



8.328  
7.766  
7.746  
7.734  
7.713  
7.616  
7.597  
7.529  
7.521  
7.508  
7.500  
7.260  
6.396  
6.377

2.432  
2.428

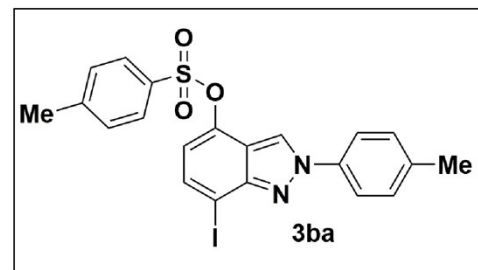

**<sup>1</sup>H NMR: 400 MHz**  
**Solvent: CDCl<sub>3</sub>**

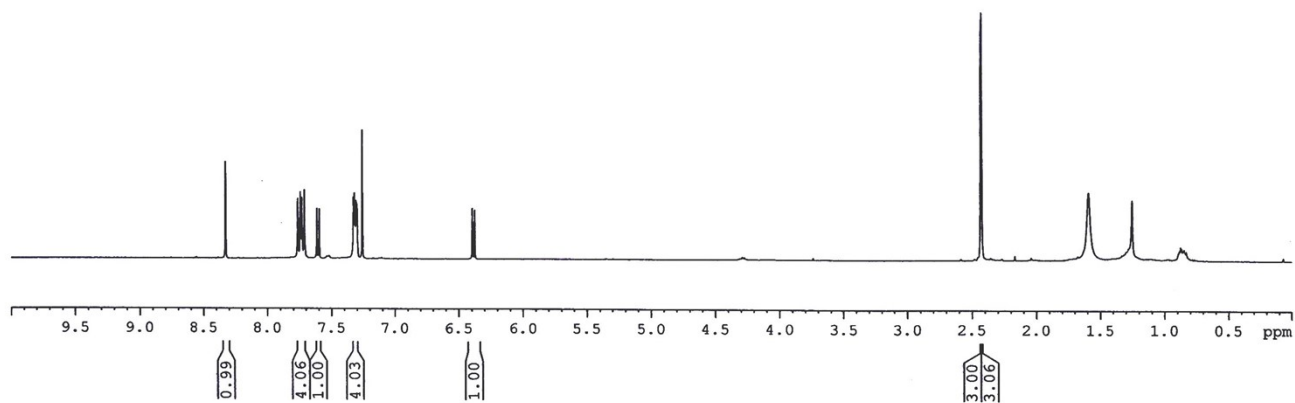

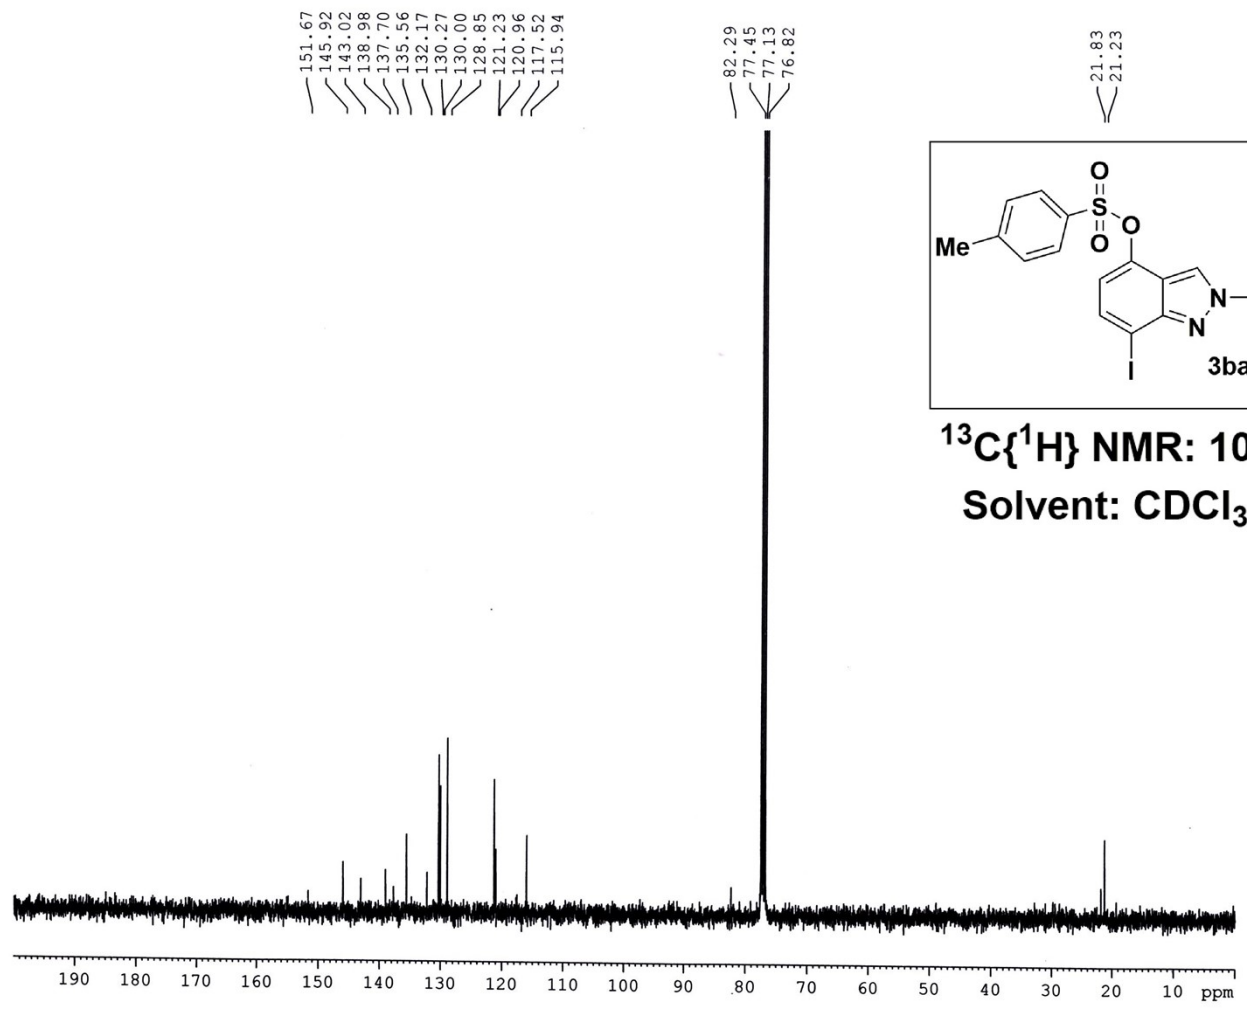

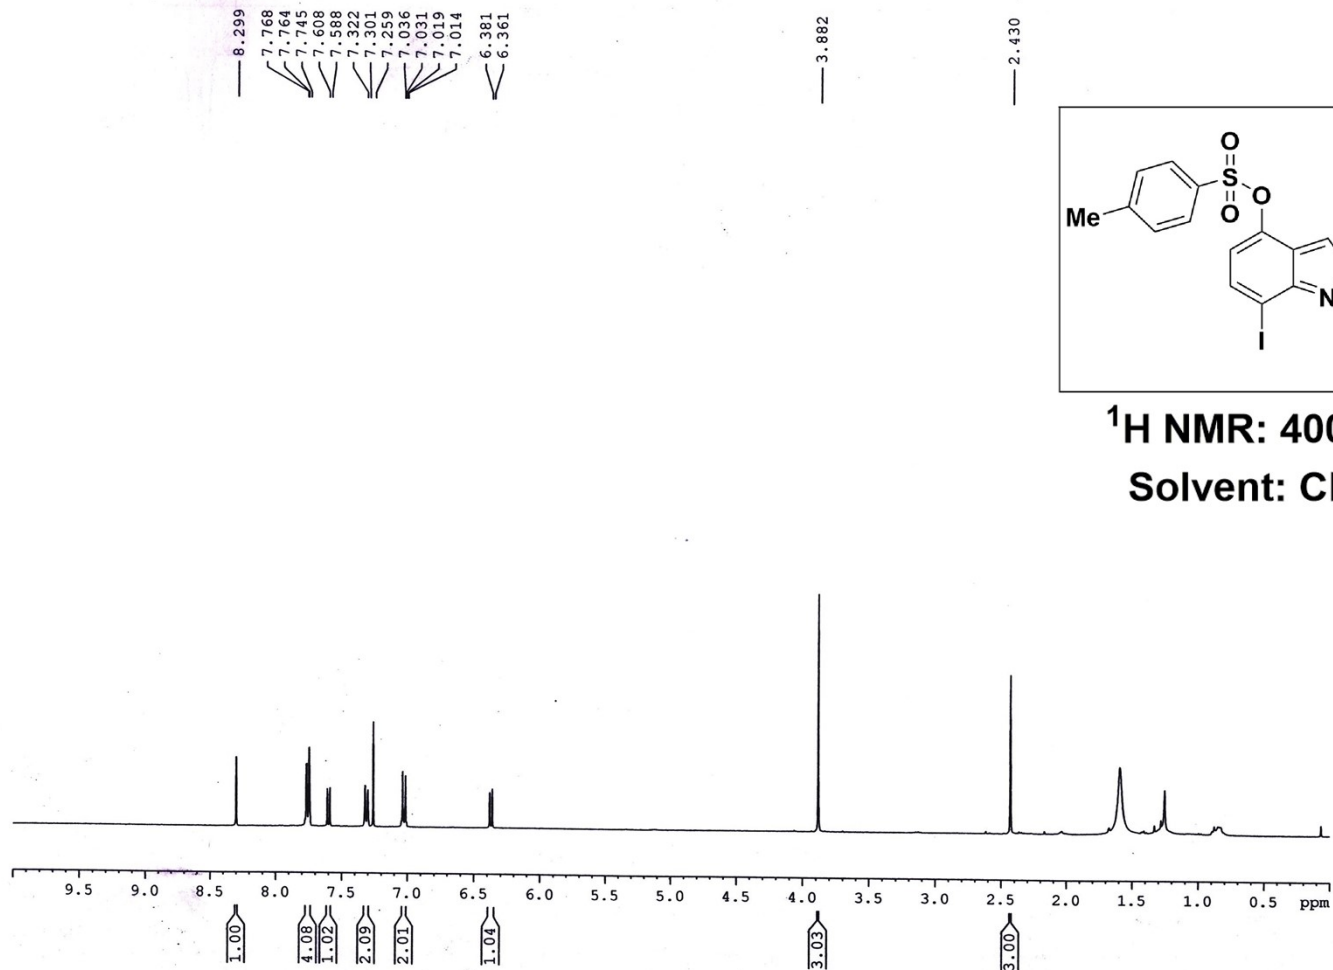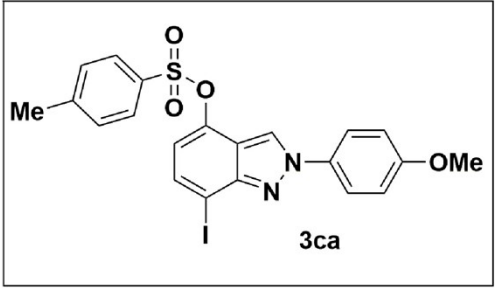

**<sup>1</sup>H NMR: 400 MHz**  
**Solvent: CDCl<sub>3</sub>**

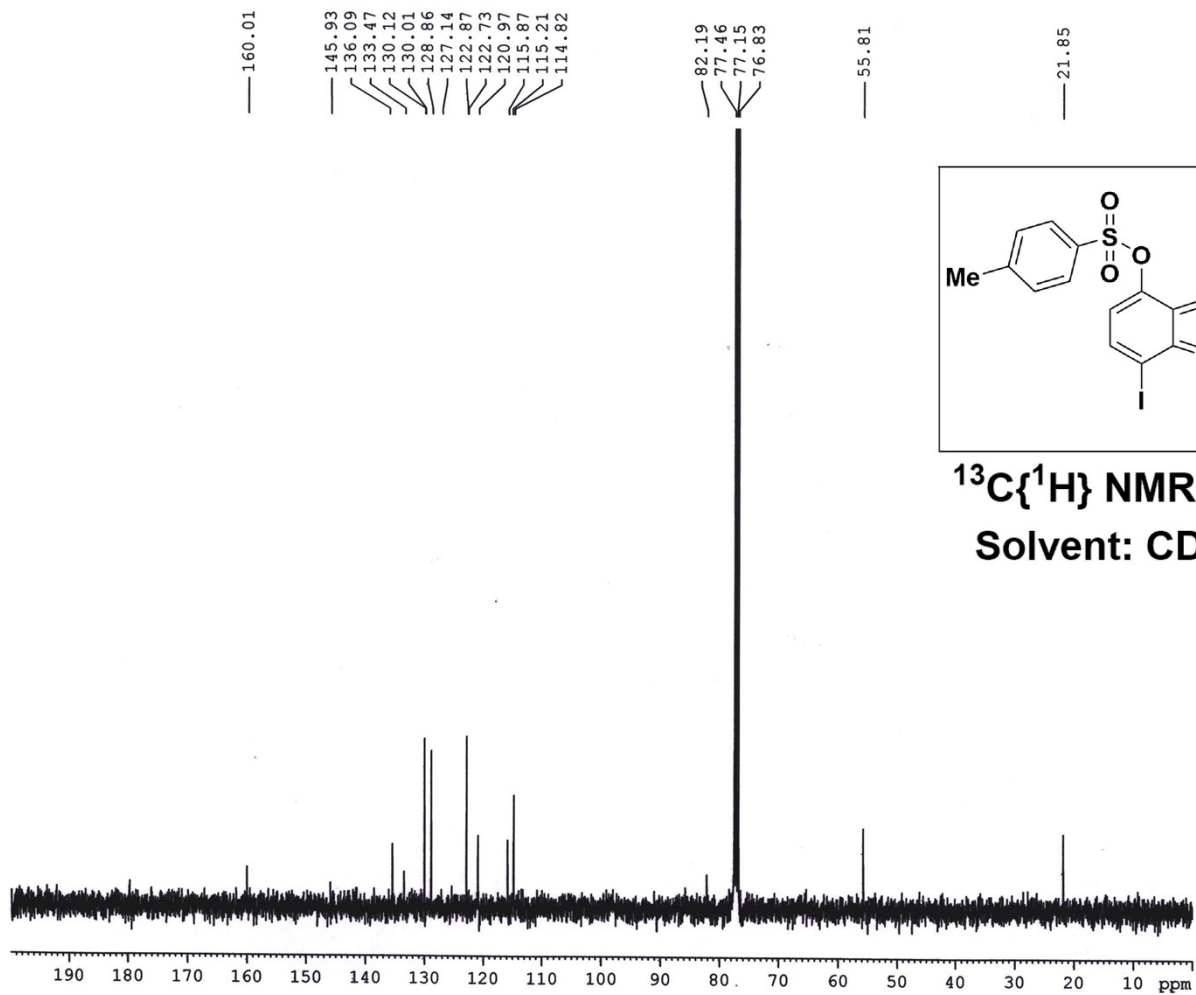

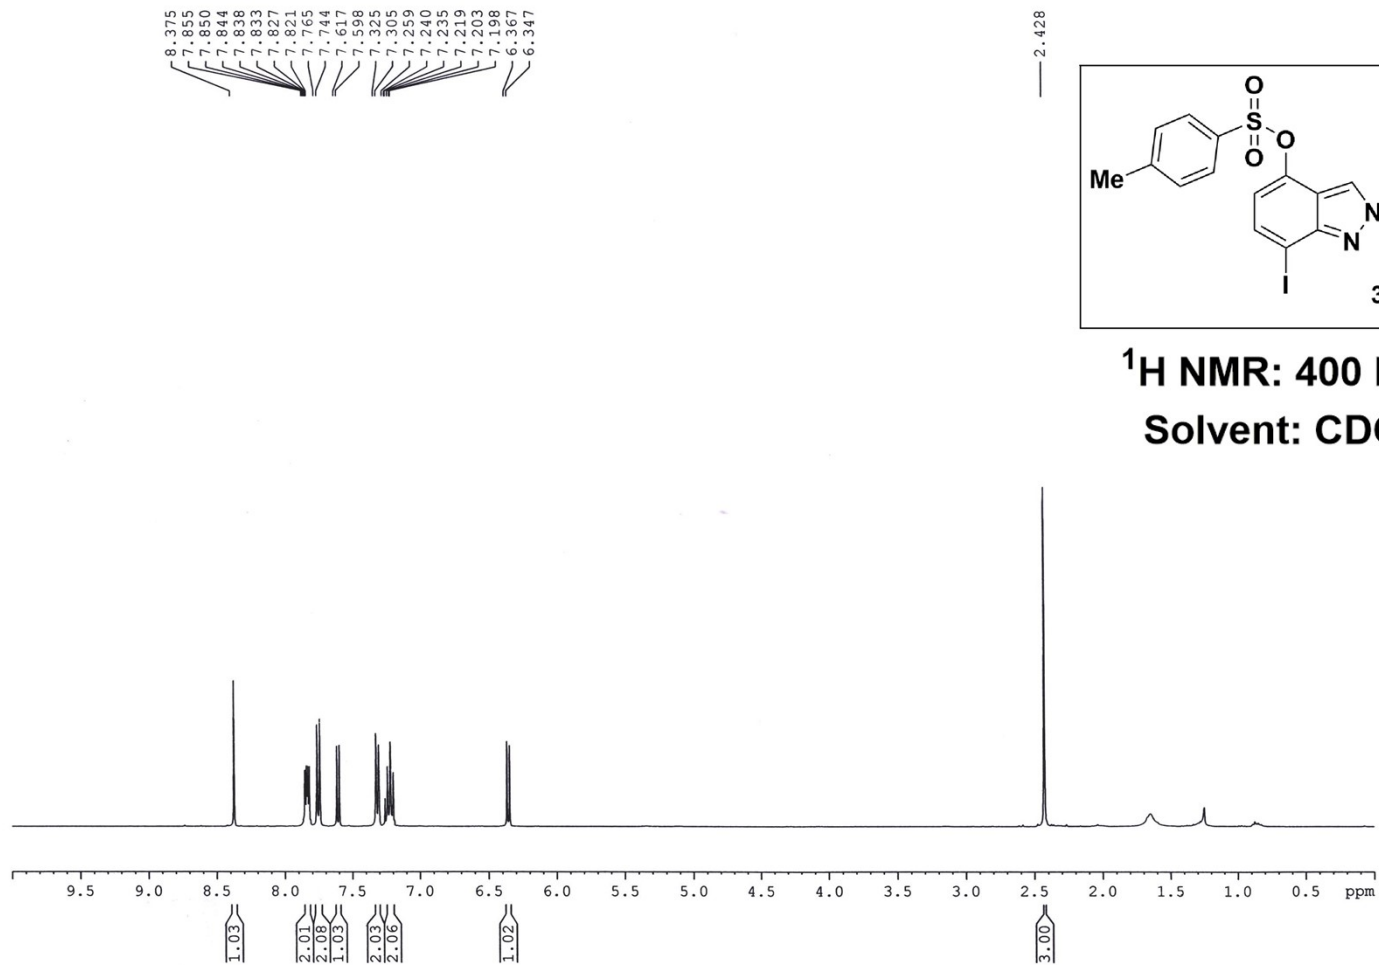

163.86  
161.38  
151.80  
145.99  
142.99  
136.24  
136.21  
135.84  
132.05  
130.04  
128.83  
123.32  
123.23  
121.35  
117.71  
116.82  
116.59  
116.12

82.26  
77.47  
77.16  
76.84

21.84

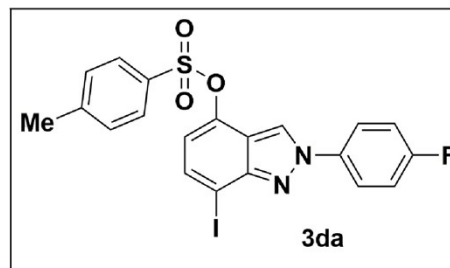

**<sup>13</sup>C{<sup>1</sup>H} NMR: 100 MHz**  
**Solvent: CDCl<sub>3</sub>**

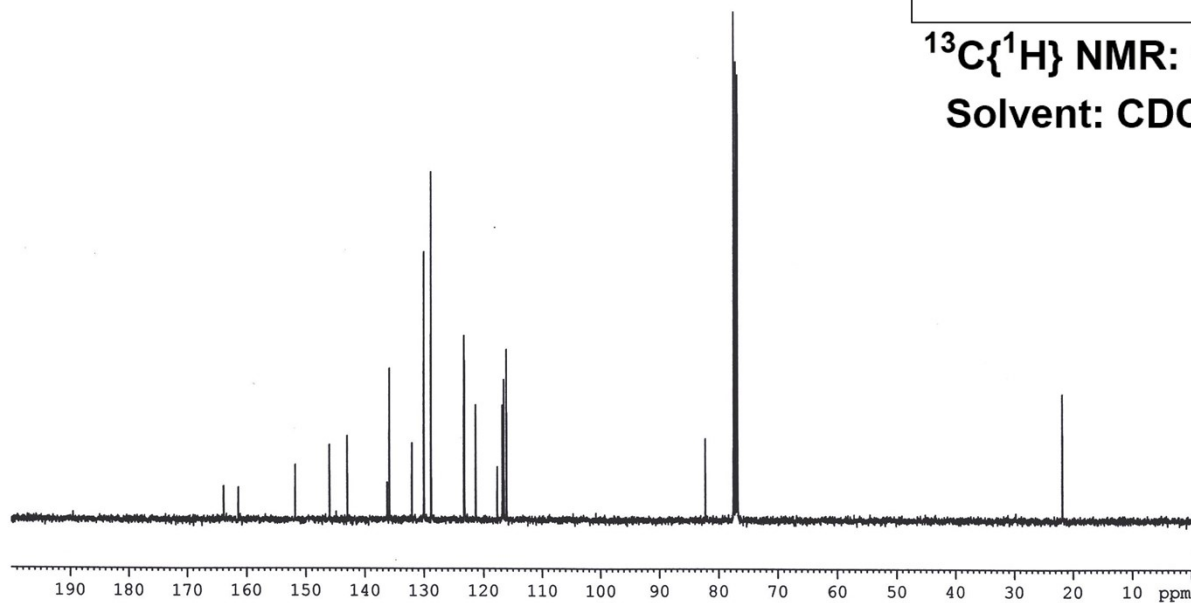

8.408  
7.839  
7.834  
7.821  
7.816  
7.765  
7.745  
7.622  
7.603  
7.525  
7.518  
7.513  
7.496  
7.489  
7.332  
7.312  
7.259  
6.339  
6.340

2.437

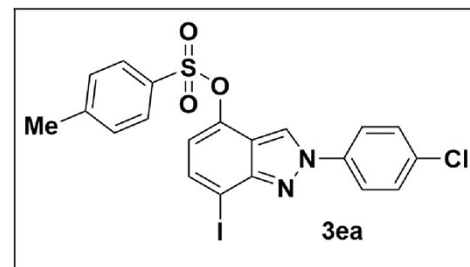

**<sup>1</sup>H NMR: 400 MHz**  
**Solvent: CDCl<sub>3</sub>**

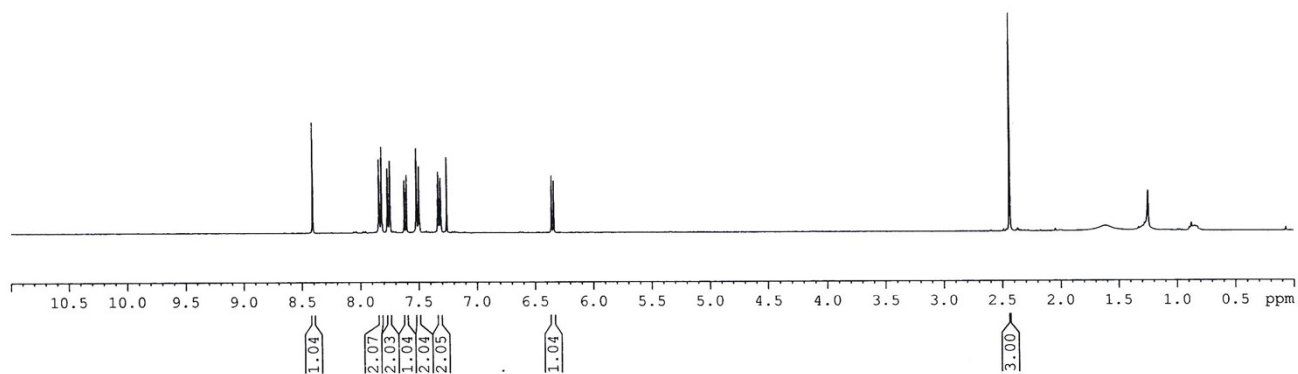

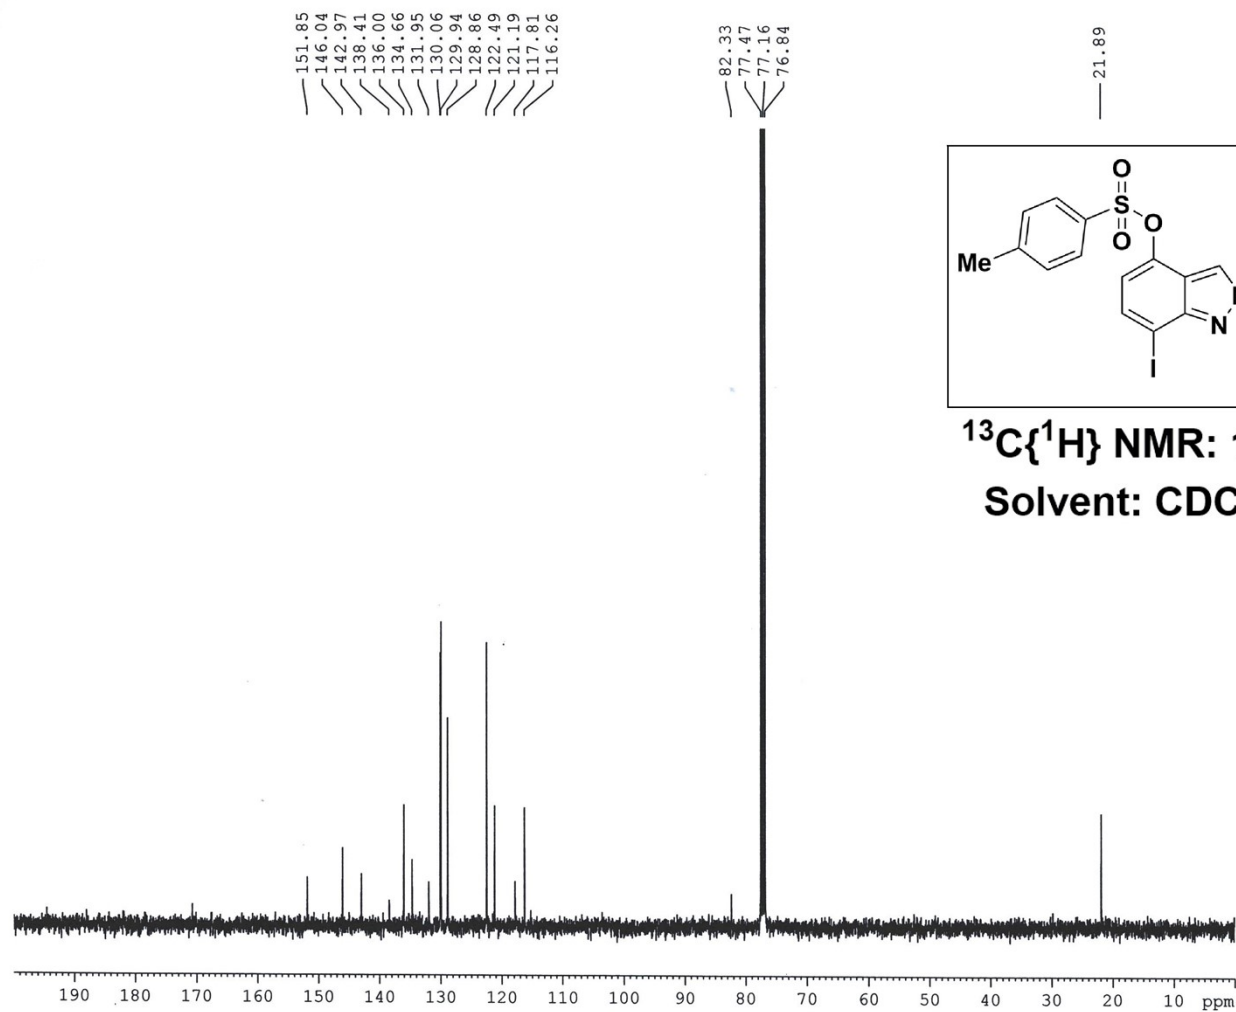



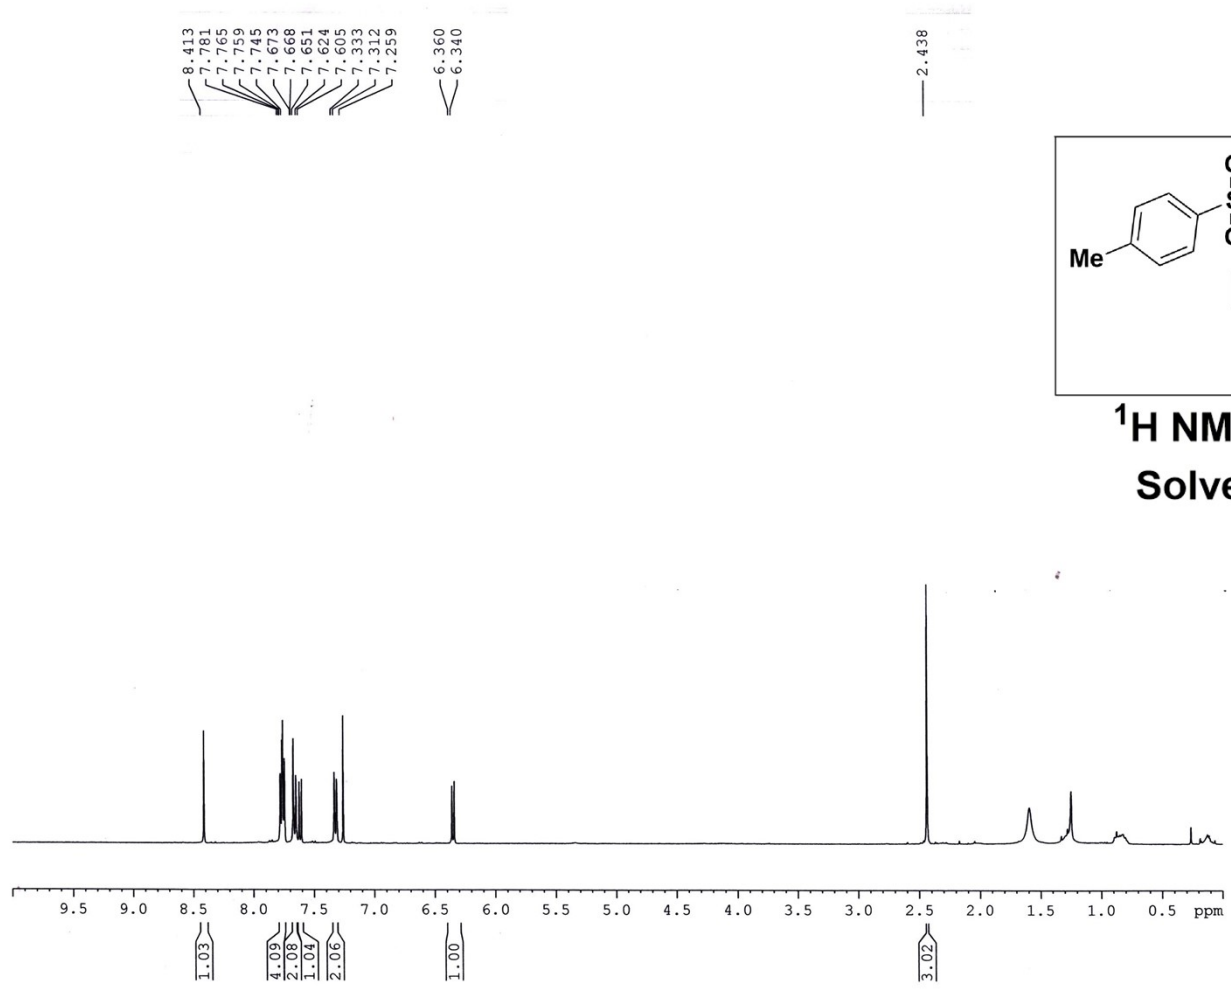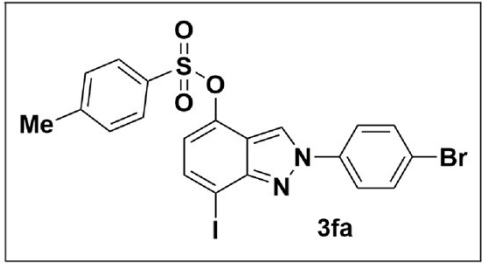

**<sup>1</sup>H NMR: 400 MHz**  
**Solvent: CDCl<sub>3</sub>**

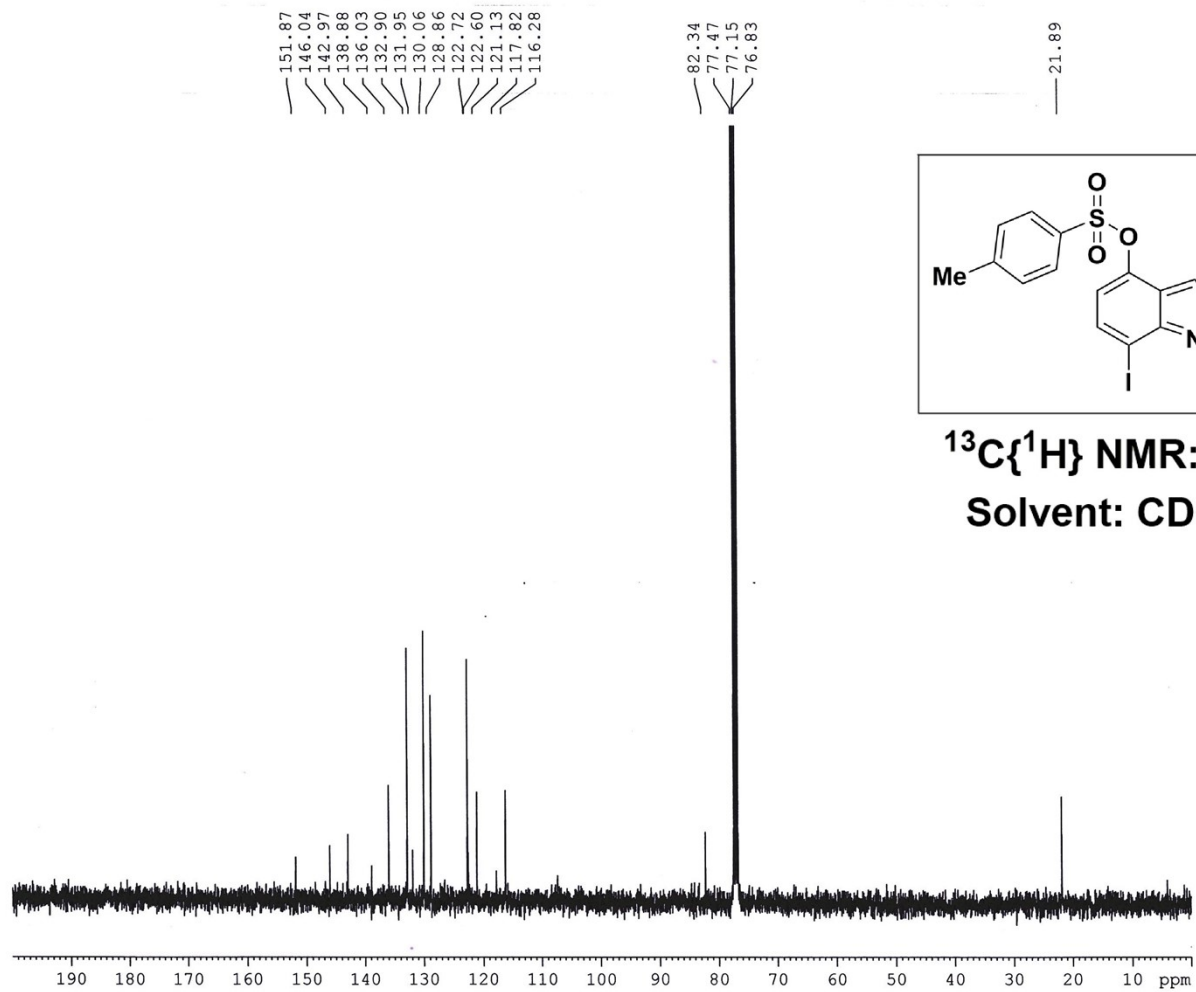

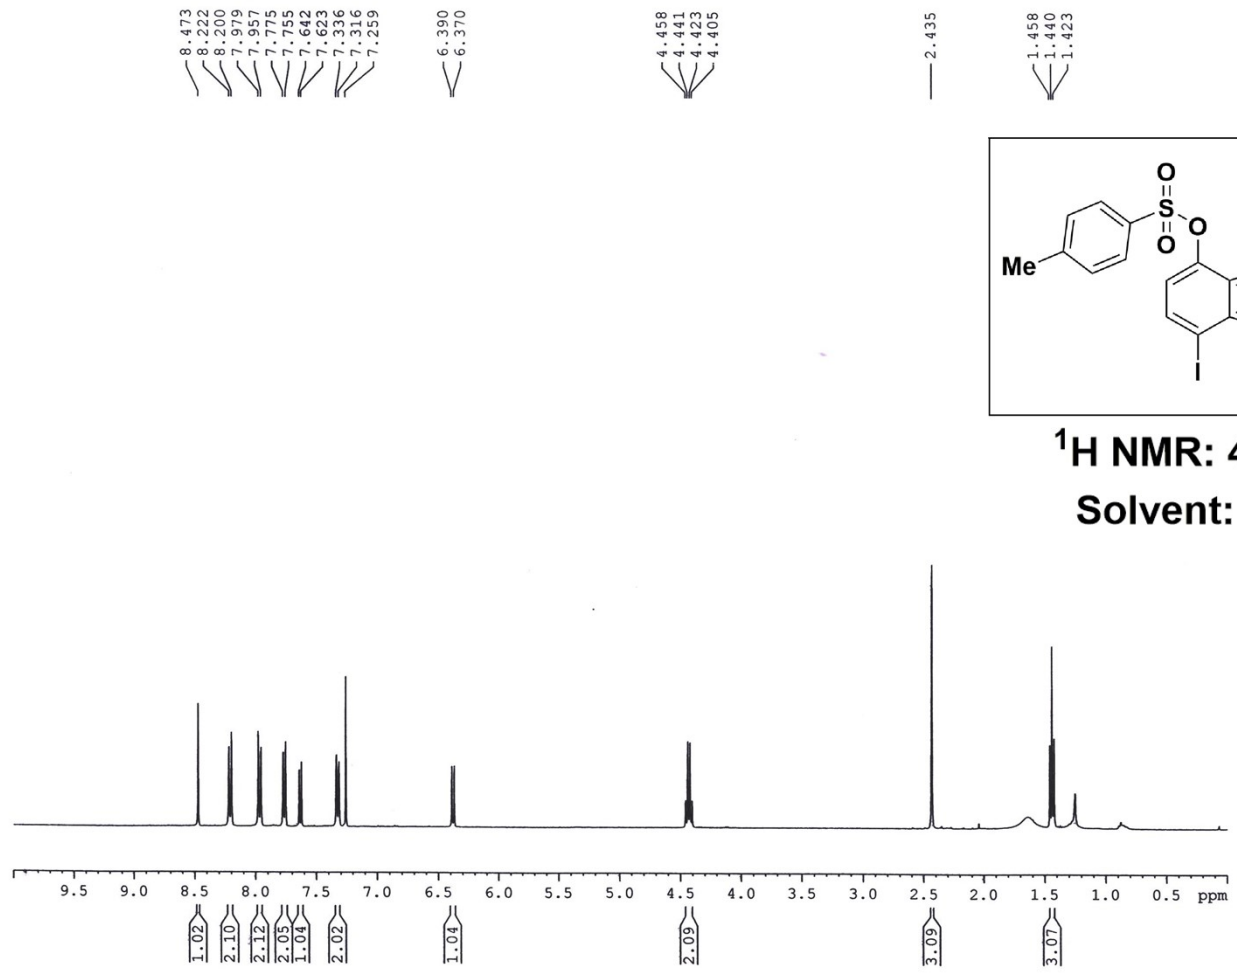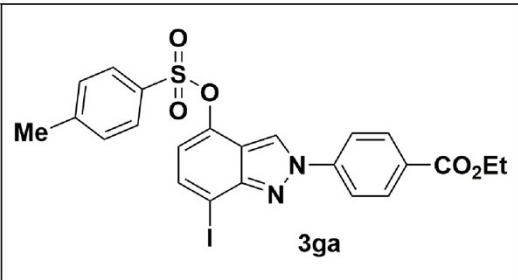

**<sup>1</sup>H NMR: 400 MHz**  
**Solvent: CDCl<sub>3</sub>**

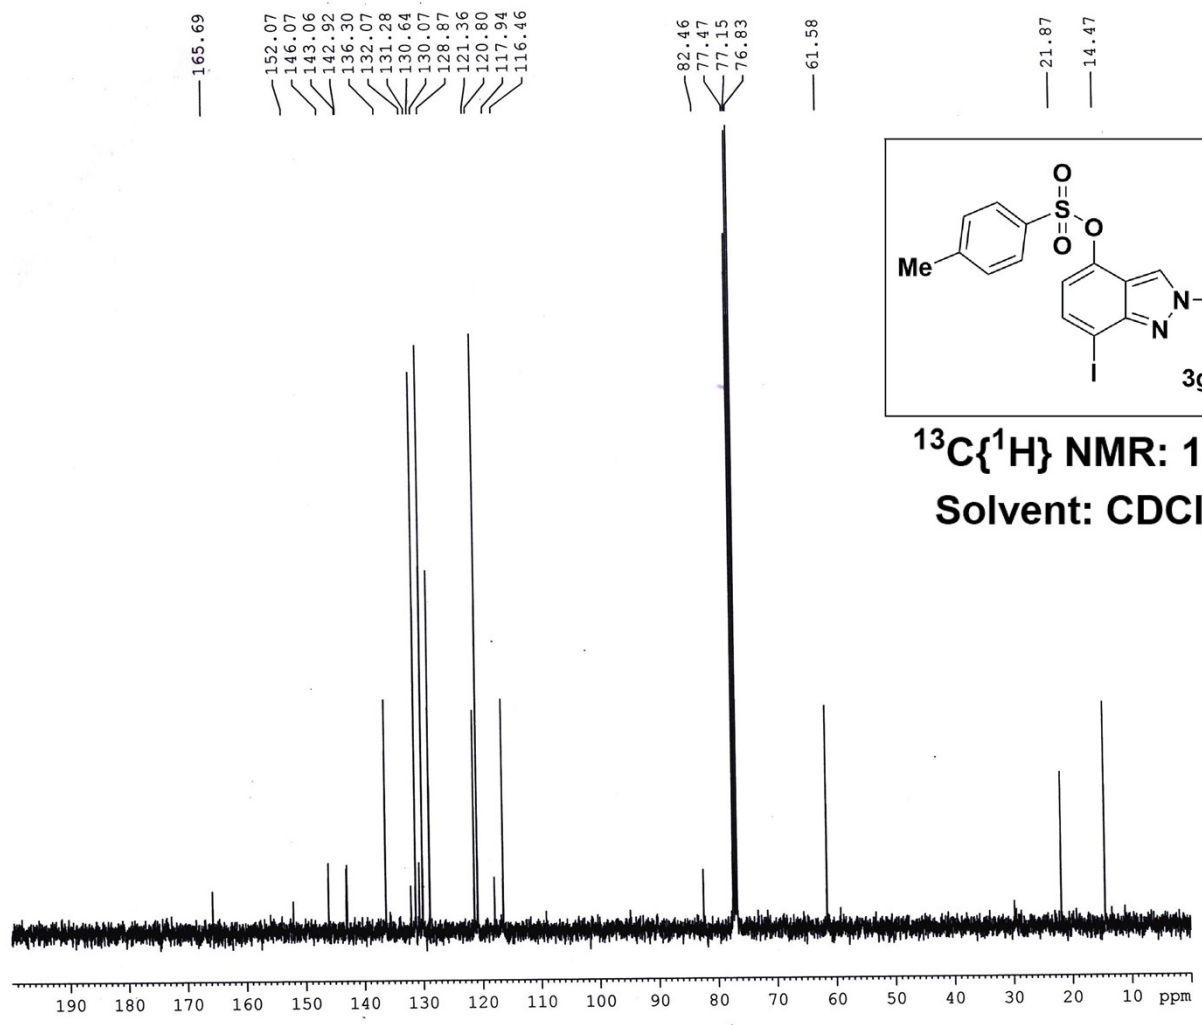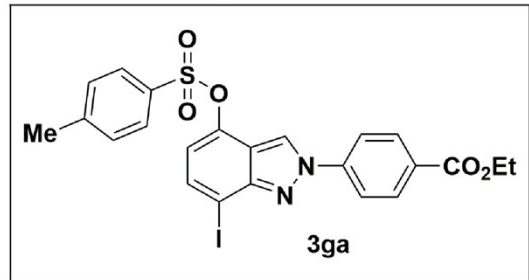

8.365  
7.768  
7.747  
7.688  
7.621  
7.602  
7.418  
7.399  
7.379  
7.323  
7.302  
7.259  
7.253  
7.234  
6.393  
6.374

2.473  
2.425

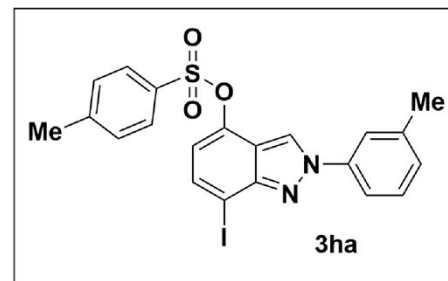

<sup>1</sup>H NMR: 400 MHz  
Solvent: CDCl<sub>3</sub>

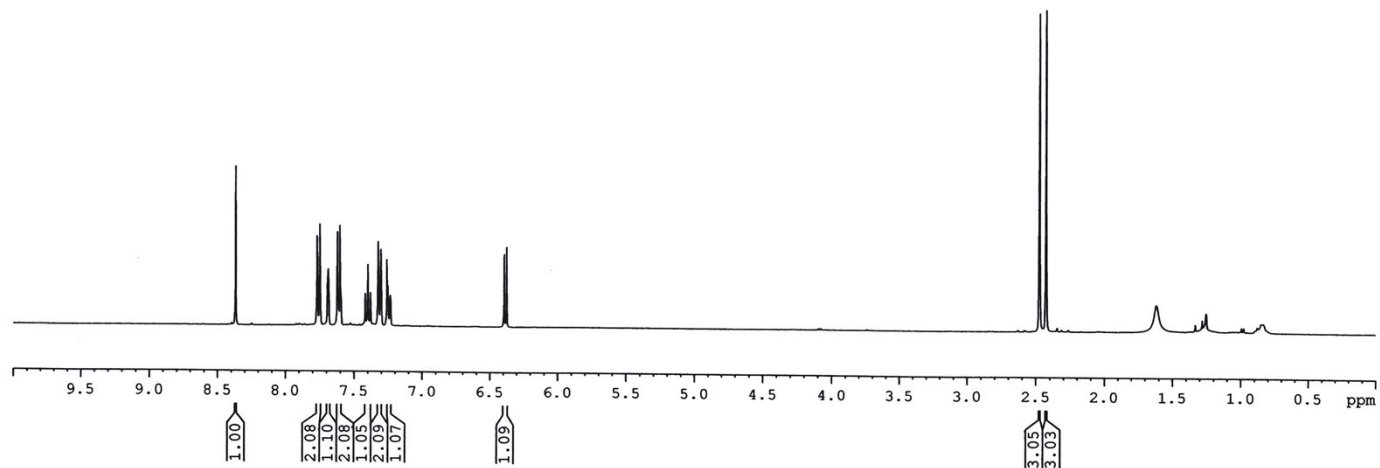

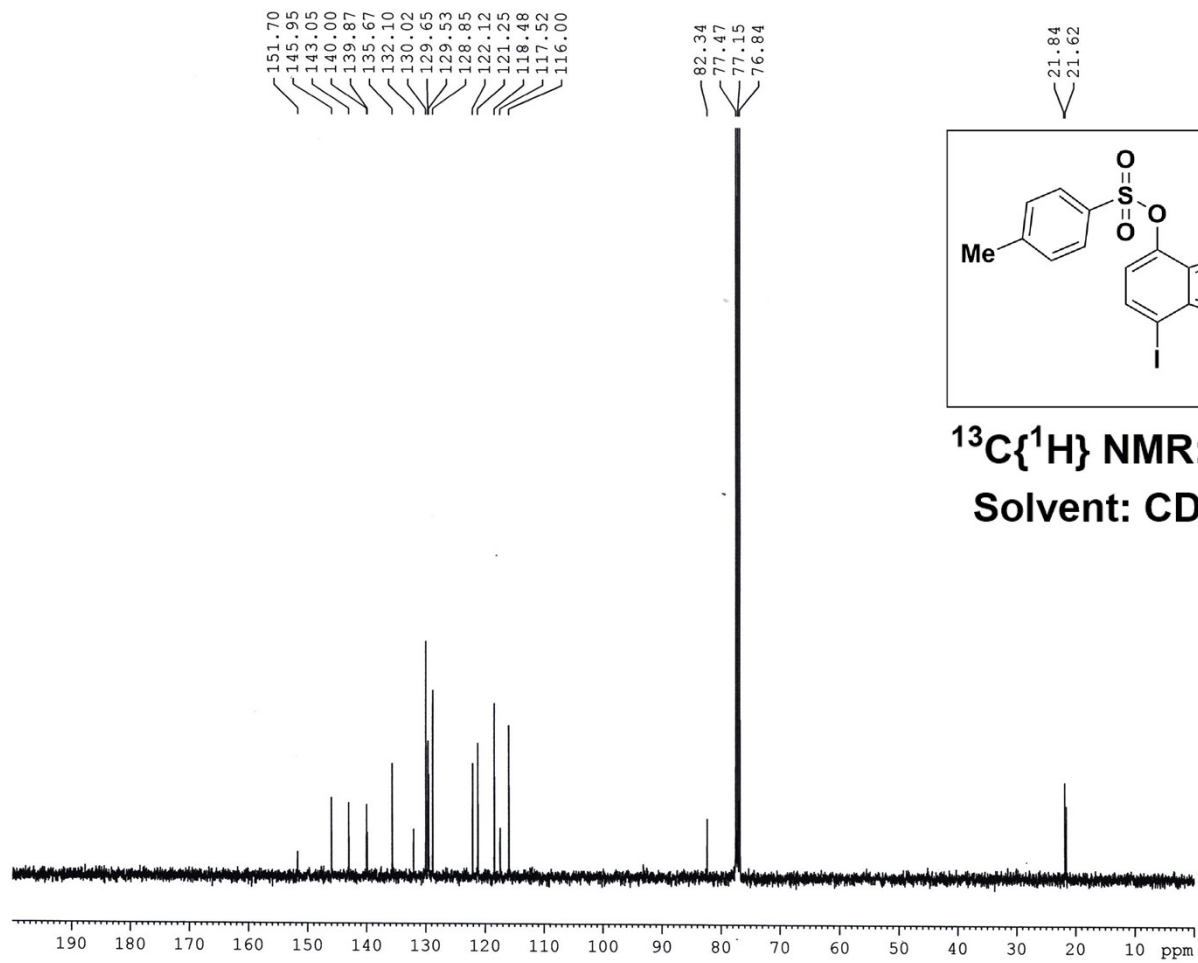

8.357  
7.887  
7.882  
7.877  
7.770  
7.750  
7.642  
7.623  
7.495  
7.475  
7.455  
7.428  
7.408  
7.341  
7.321  
7.260  
6.399  
6.380

2.446

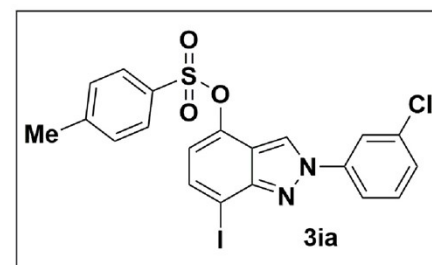

**<sup>1</sup>H NMR: 400 MHz**  
**Solvent: CDCl<sub>3</sub>**

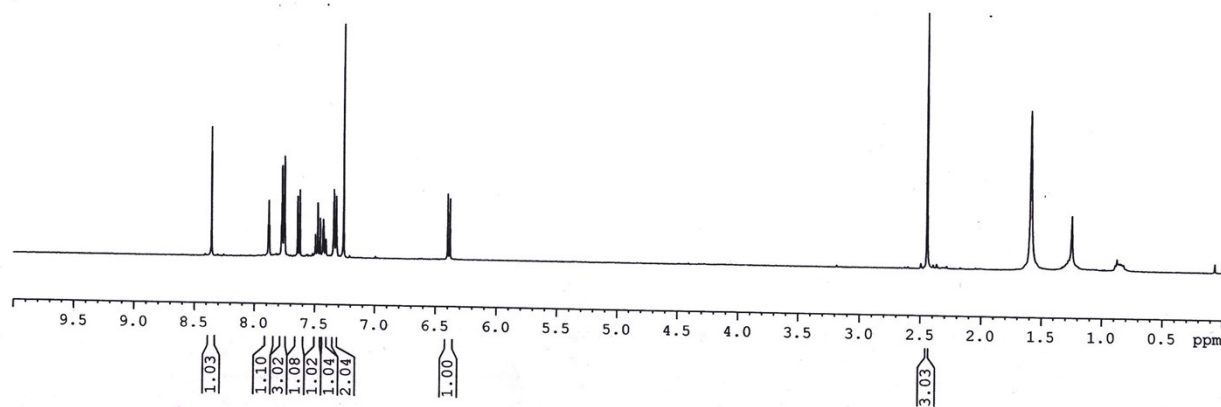

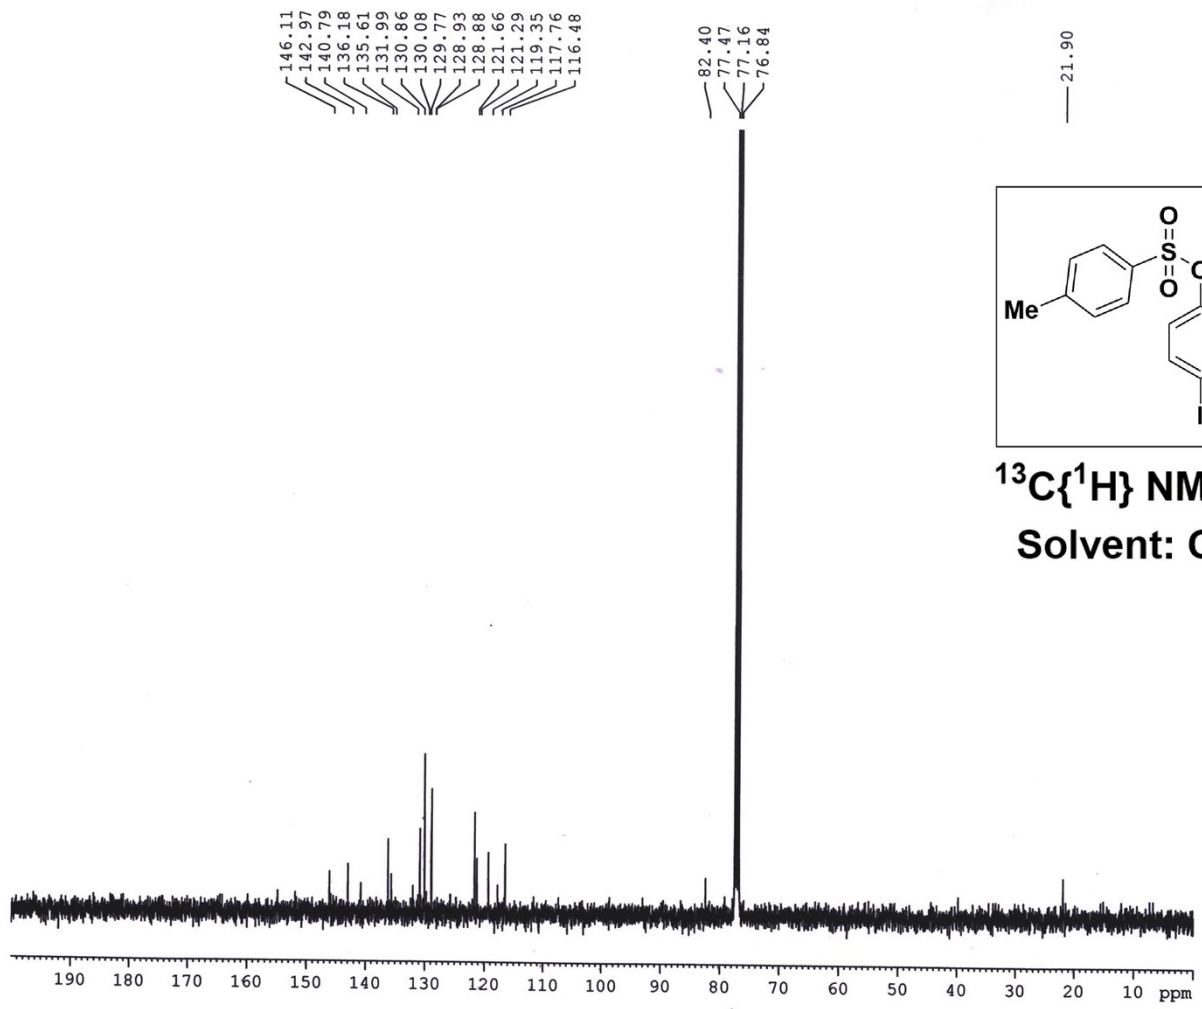



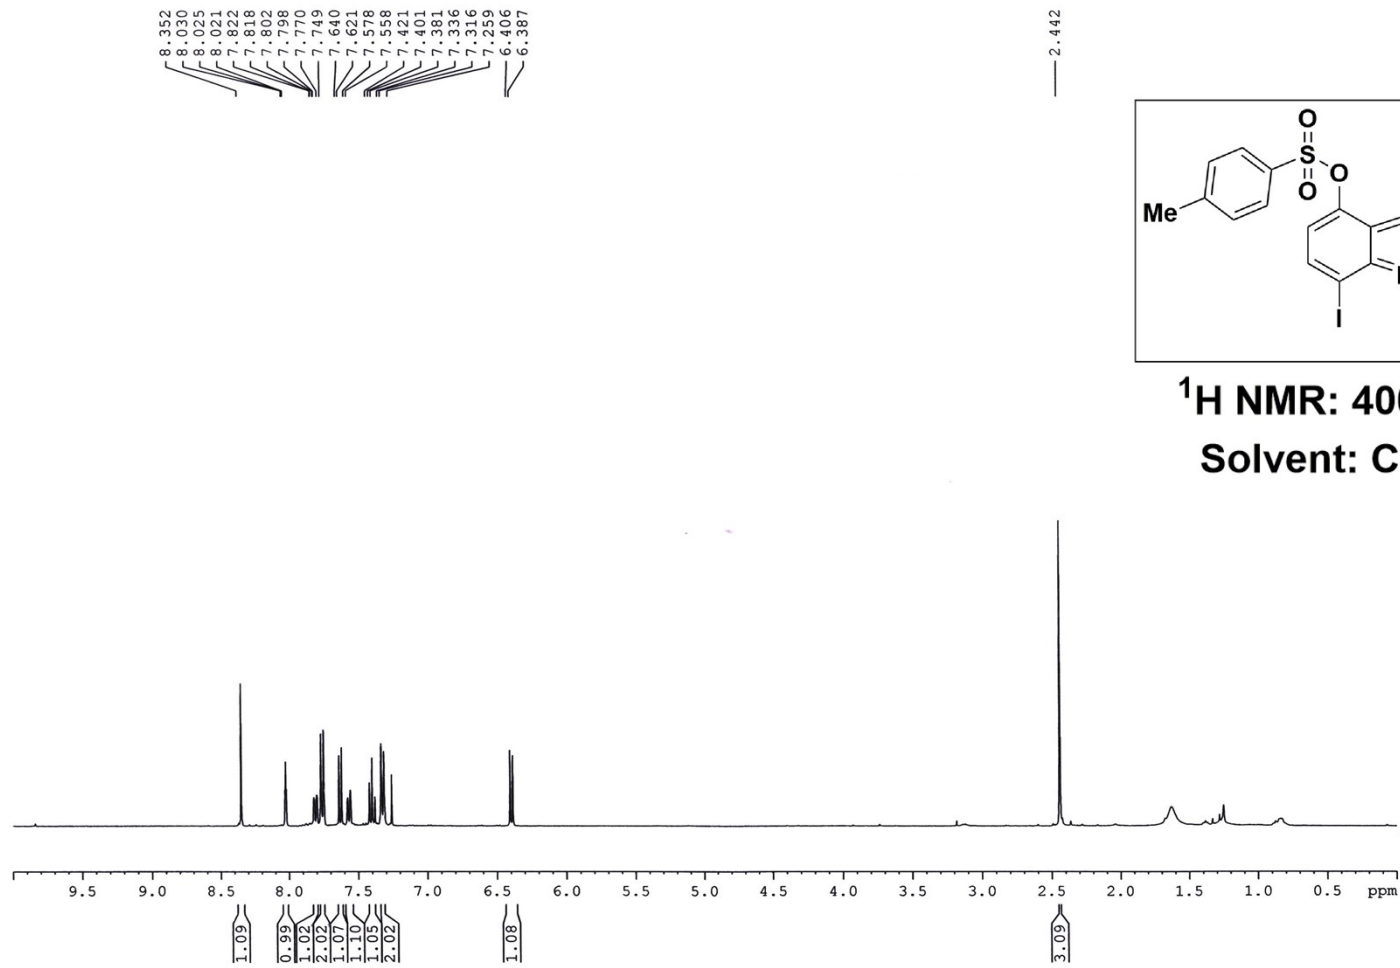

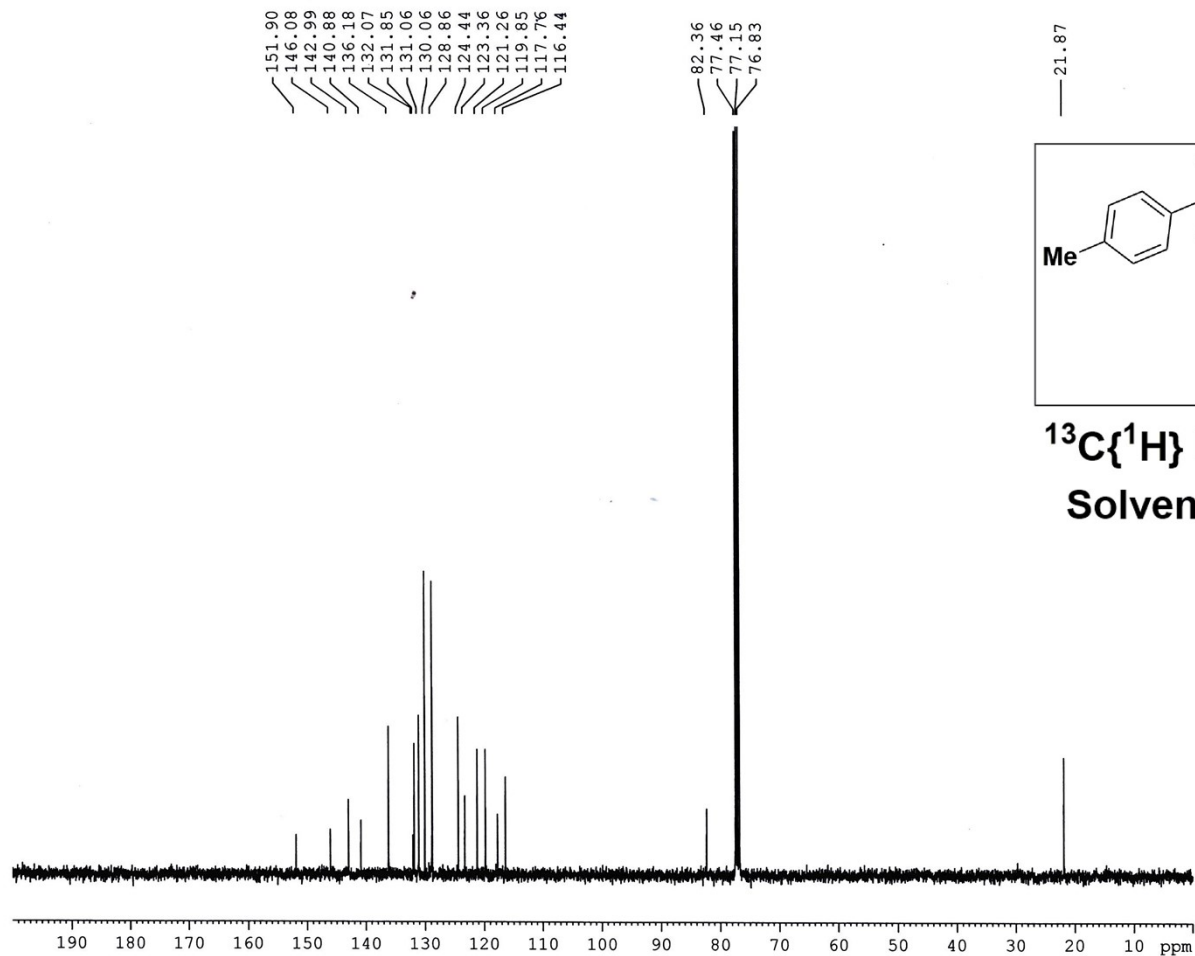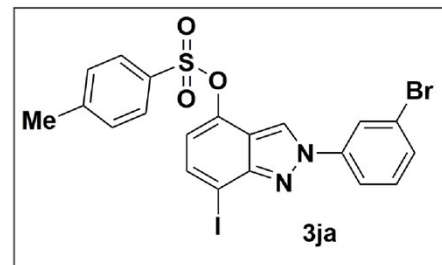

$^{13}\text{C}\{^1\text{H}\}$  NMR: 100 MHz  
Solvent:  $\text{CDCl}_3$

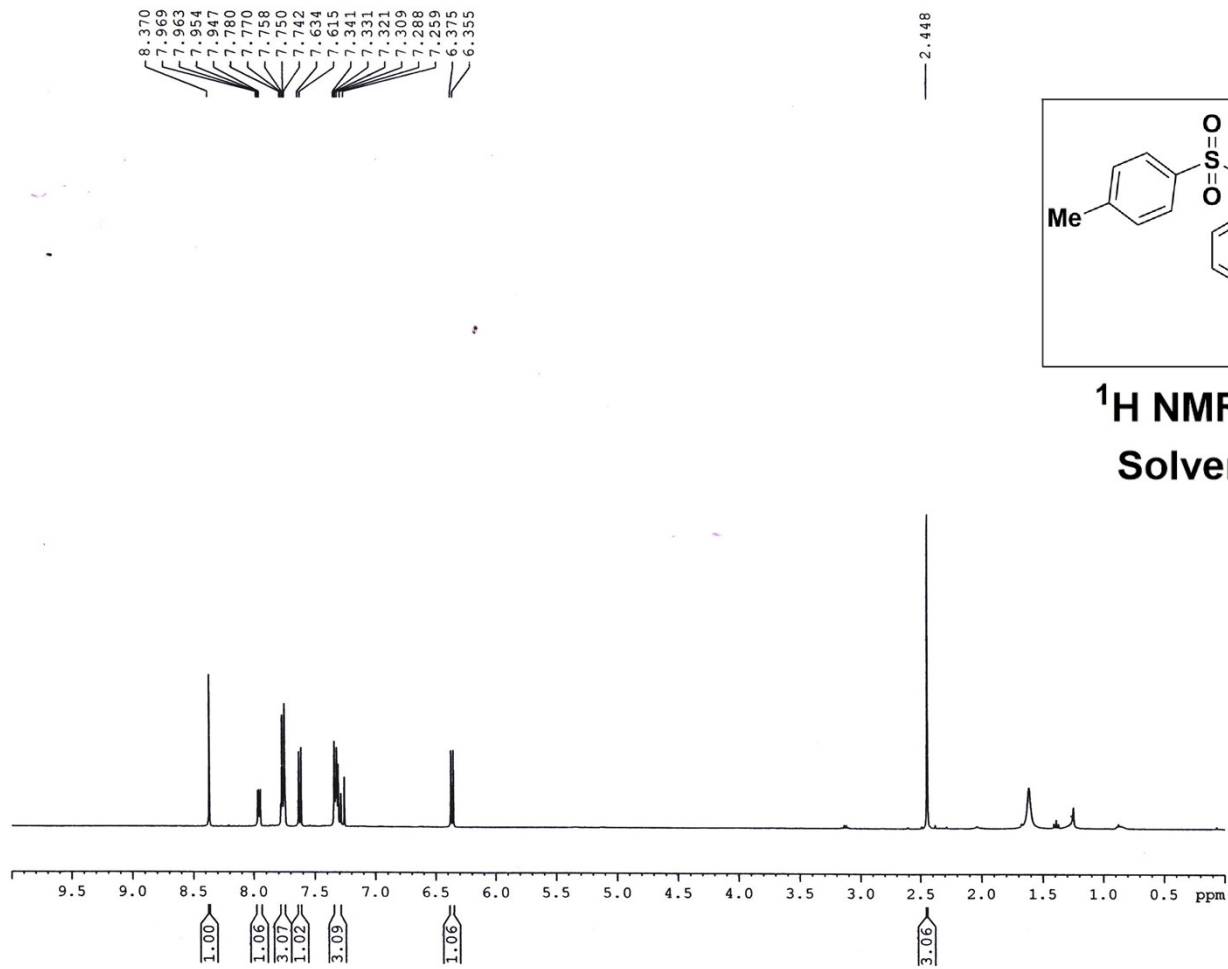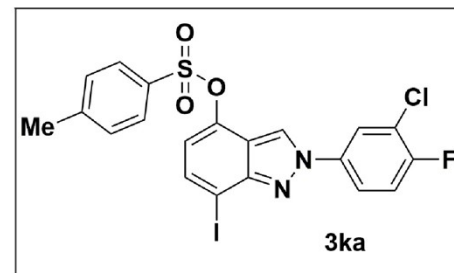

**$^1\text{H}$  NMR: 400 MHz**  
**Solvent:  $\text{CDCl}_3$**

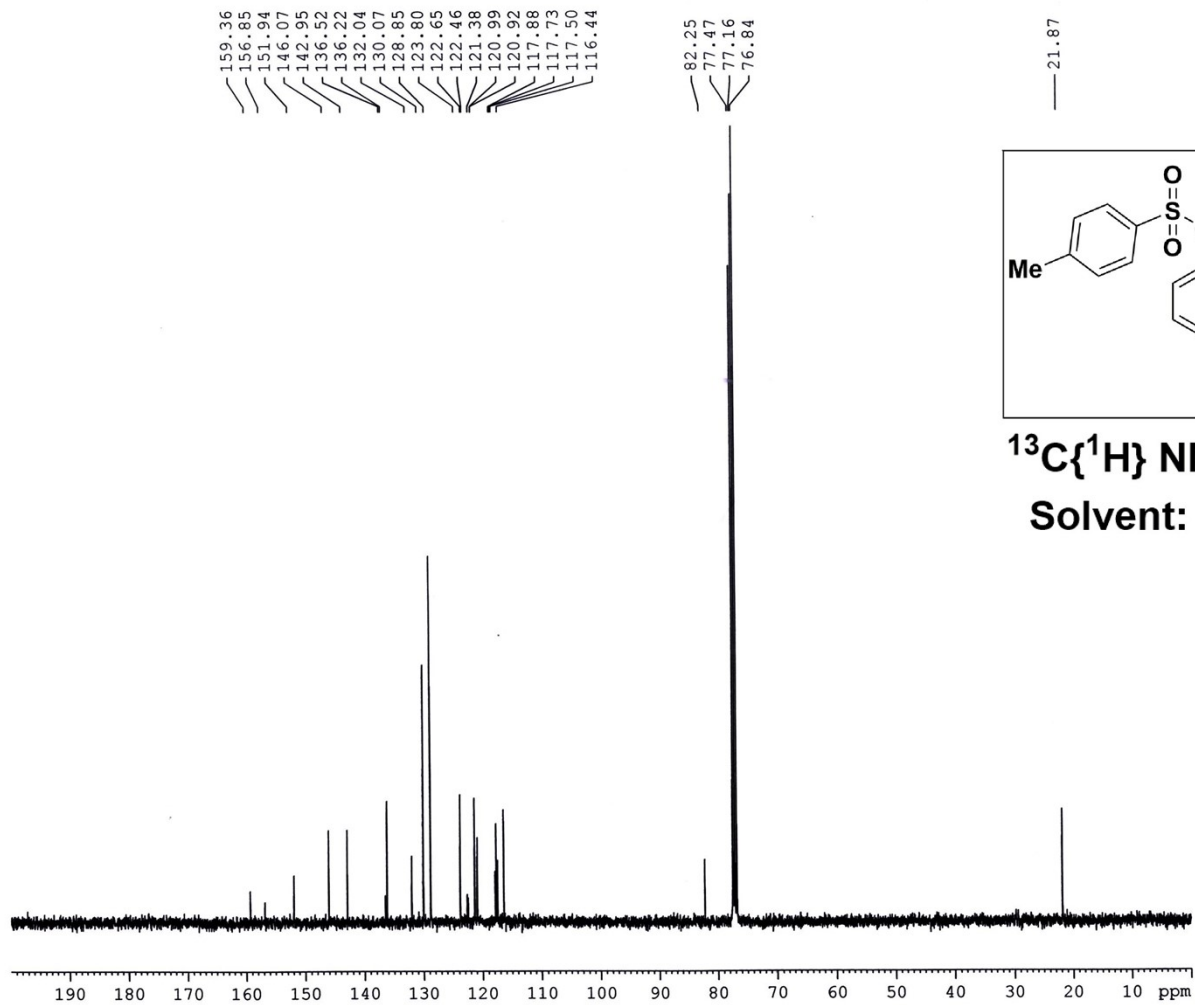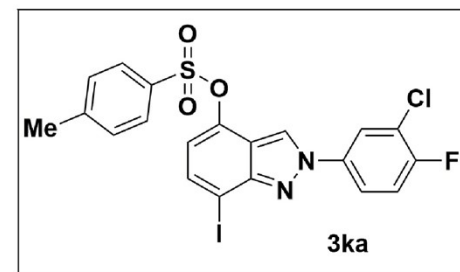

**$^{13}\text{C}\{^1\text{H}\}$  NMR: 100 MHz**  
**Solvent:  $\text{CDCl}_3$**

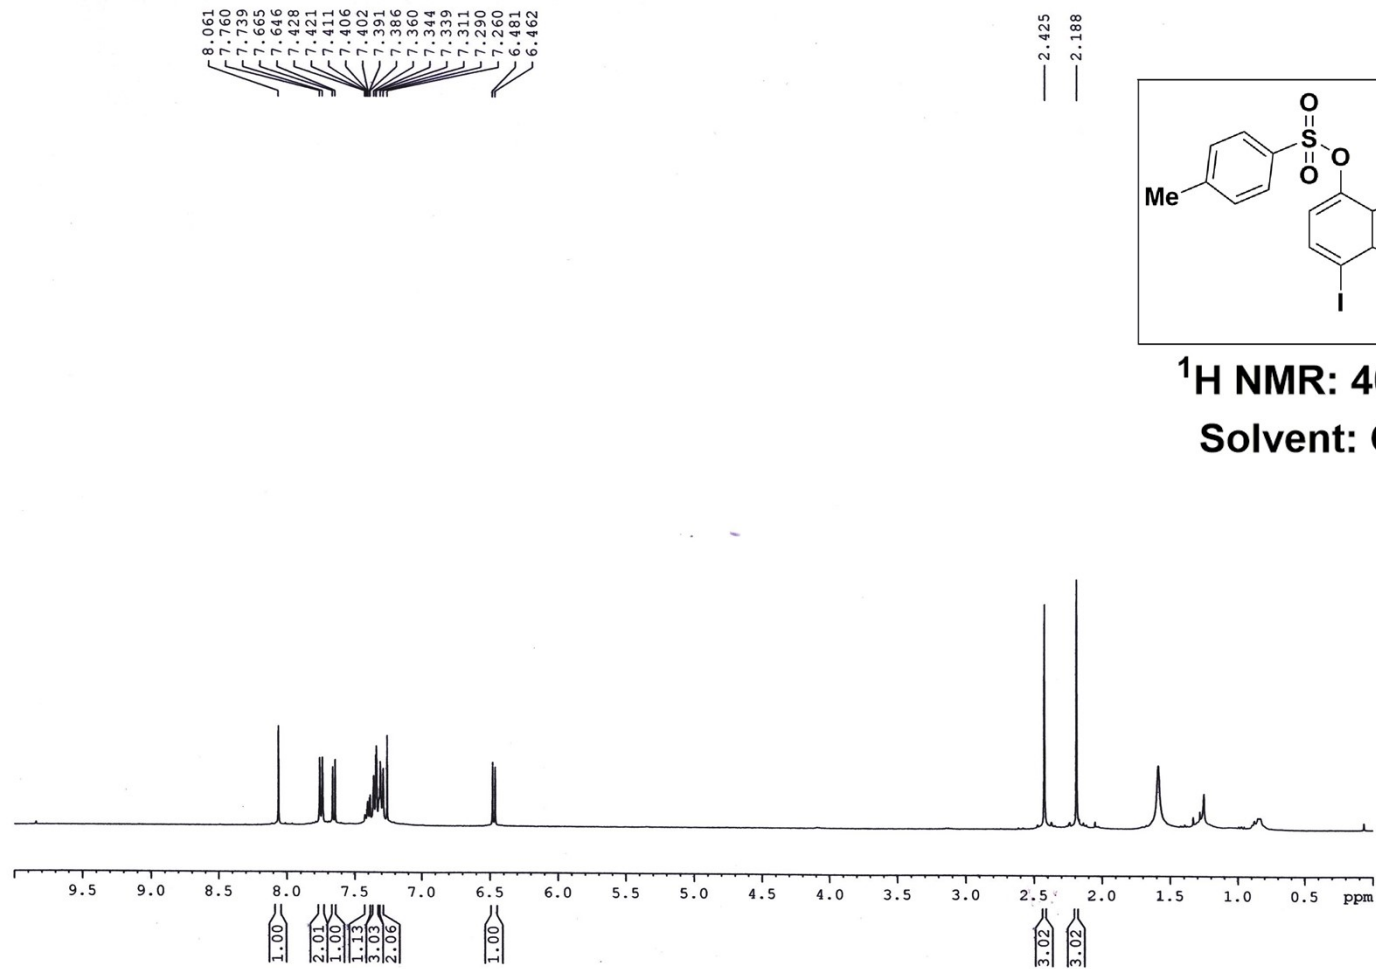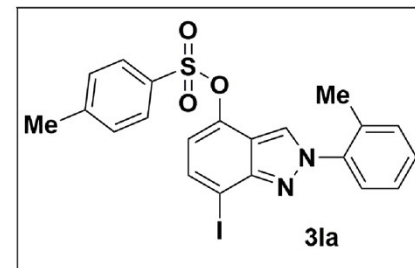

**<sup>1</sup>H NMR: 400 MHz**  
**Solvent: CDCl<sub>3</sub>**

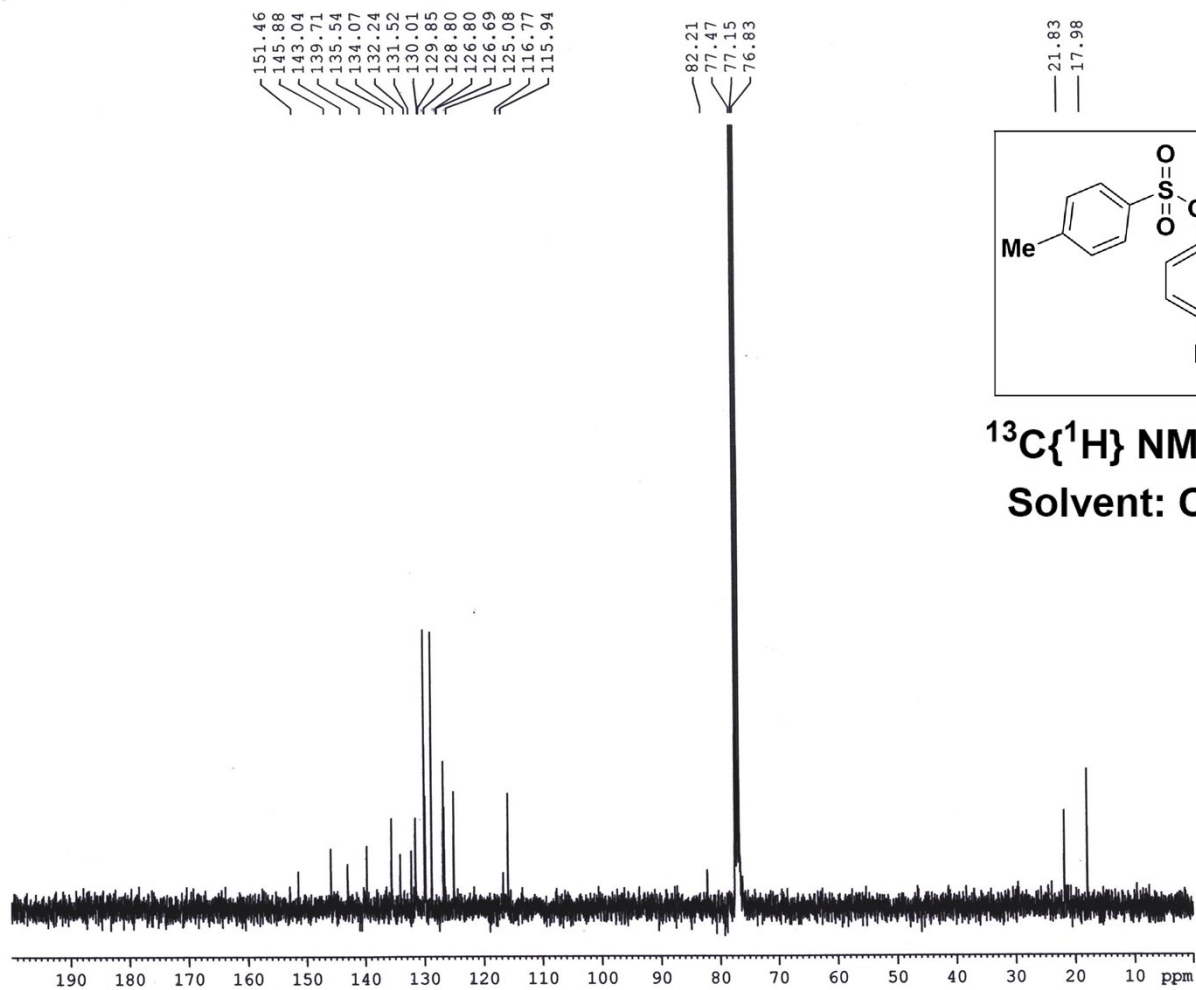

8.424  
7.906  
7.887  
7.873  
7.853  
7.702  
7.683  
7.664  
7.624  
7.605  
7.560  
7.557  
7.539  
7.521  
7.518  
7.461  
7.443  
7.424  
7.260  
6.383  
6.364

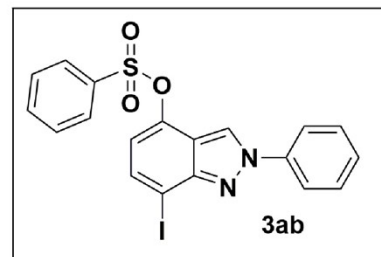

**$^1\text{H}$  NMR: 400 MHz**  
**Solvent:  $\text{CDCl}_3$**

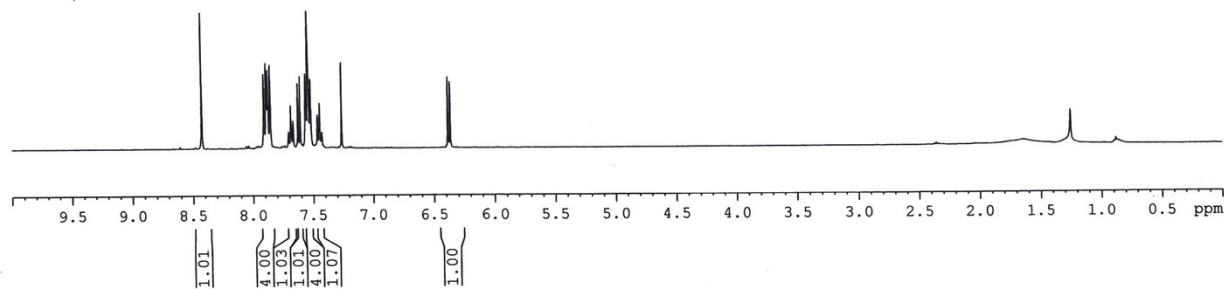

151.79  
142.97  
139.93  
135.69  
135.15  
134.69  
129.79  
129.43  
128.89  
128.79  
121.47  
121.15  
117.55  
116.02

82.54  
77.47  
77.15  
76.83

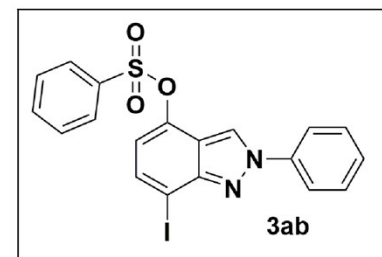

$^{13}\text{C}\{^1\text{H}\}$  NMR: 100 MHz  
Solvent:  $\text{CDCl}_3$

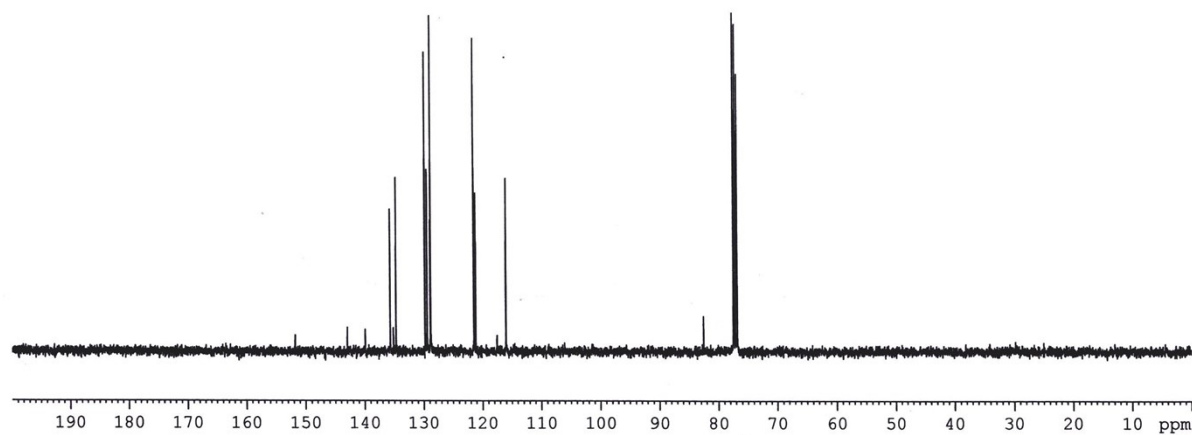



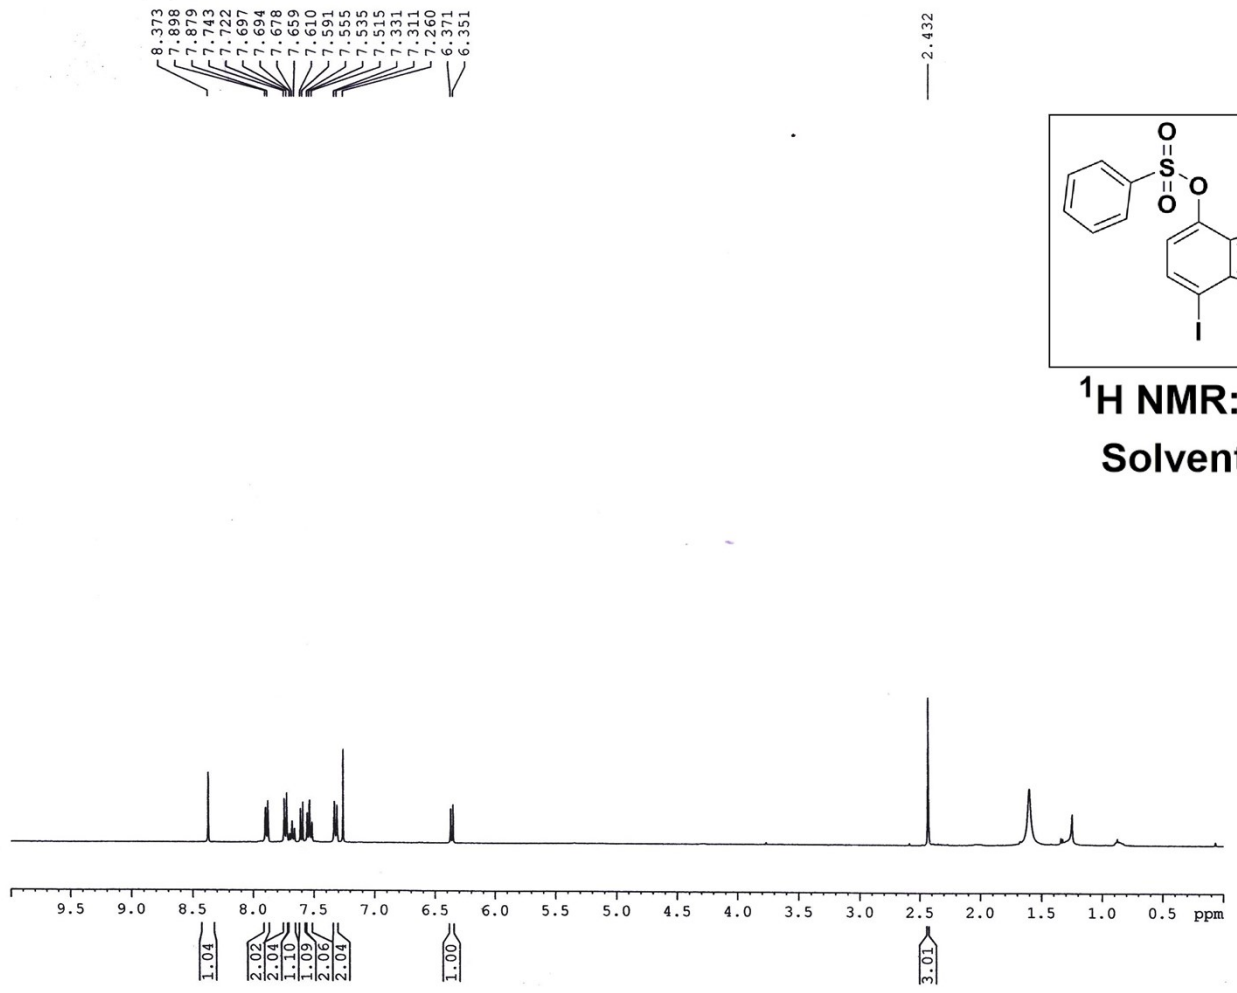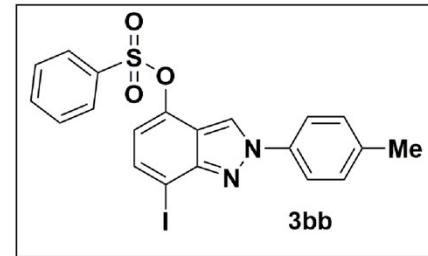

**<sup>1</sup>H NMR: 400 MHz**  
**Solvent: CDCl<sub>3</sub>**

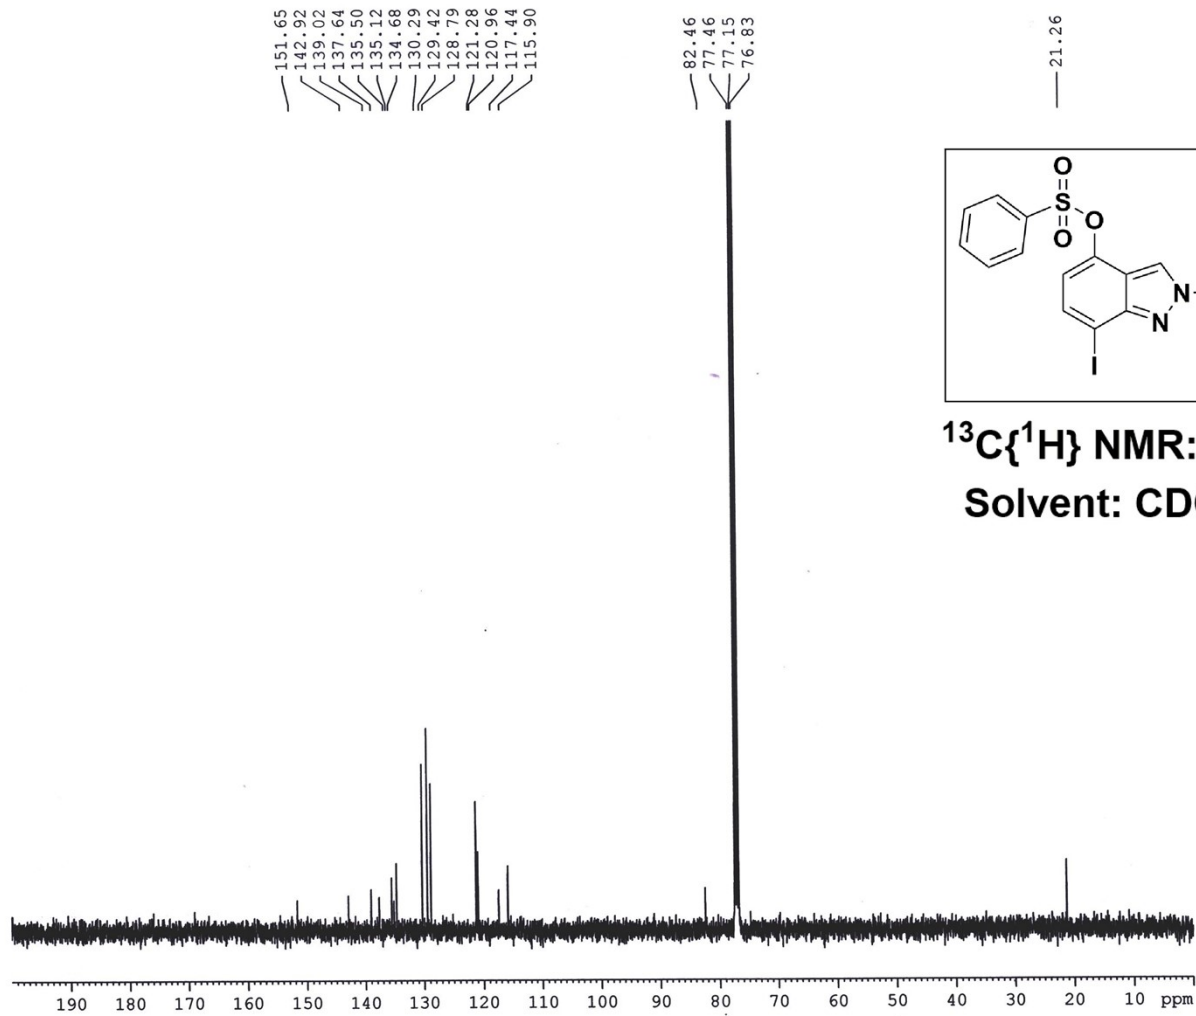

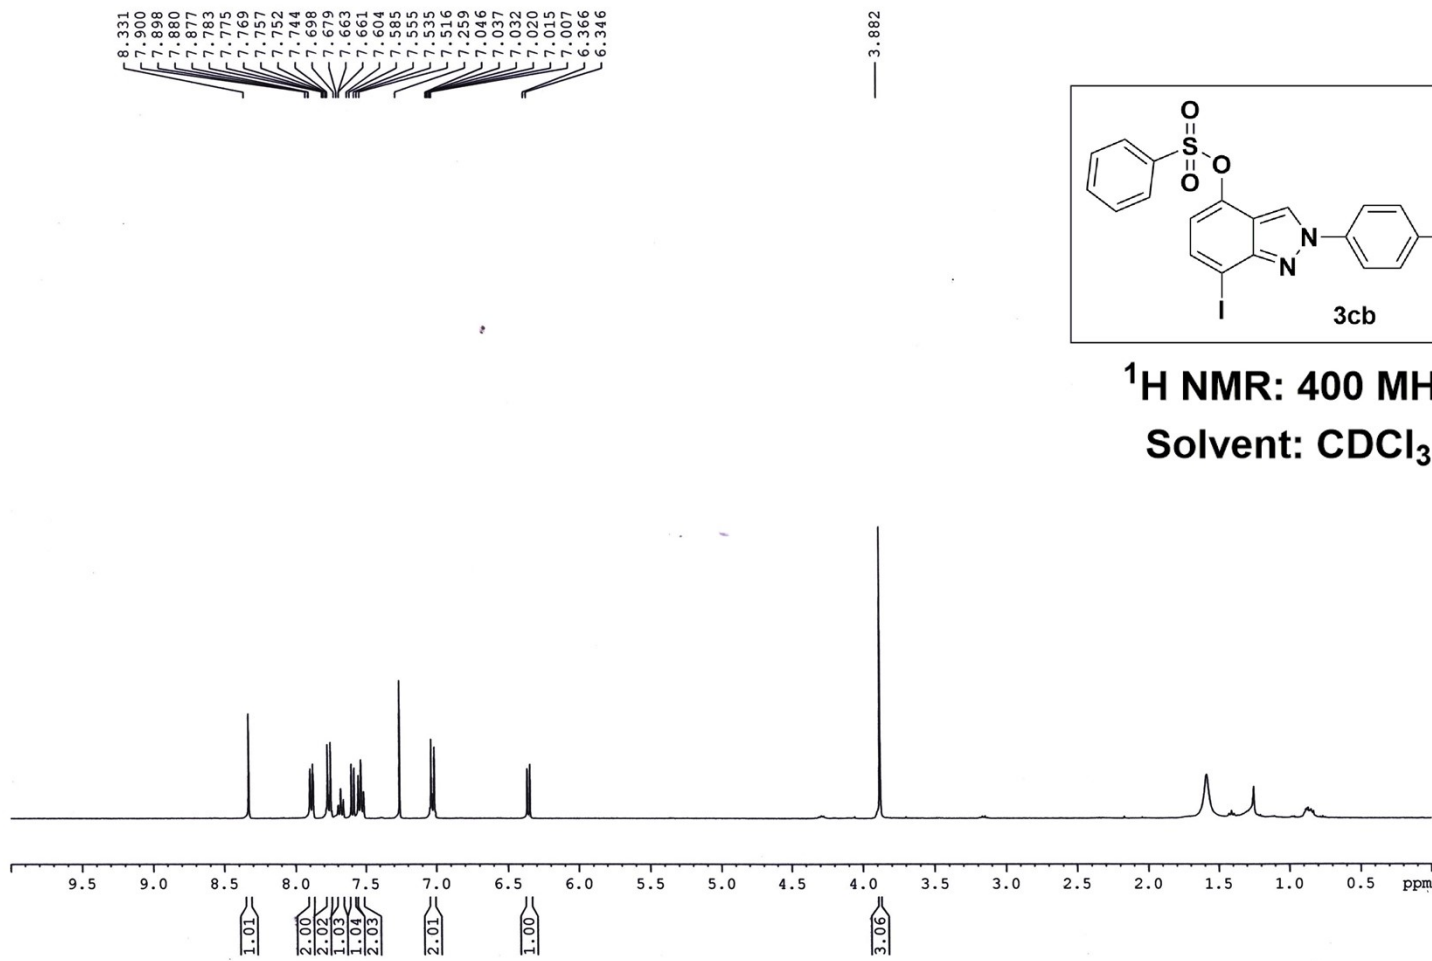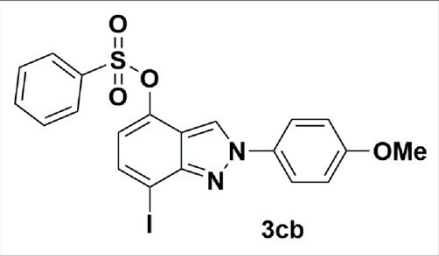

**<sup>1</sup>H NMR: 400 MHz**  
**Solvent: CDCl<sub>3</sub>**

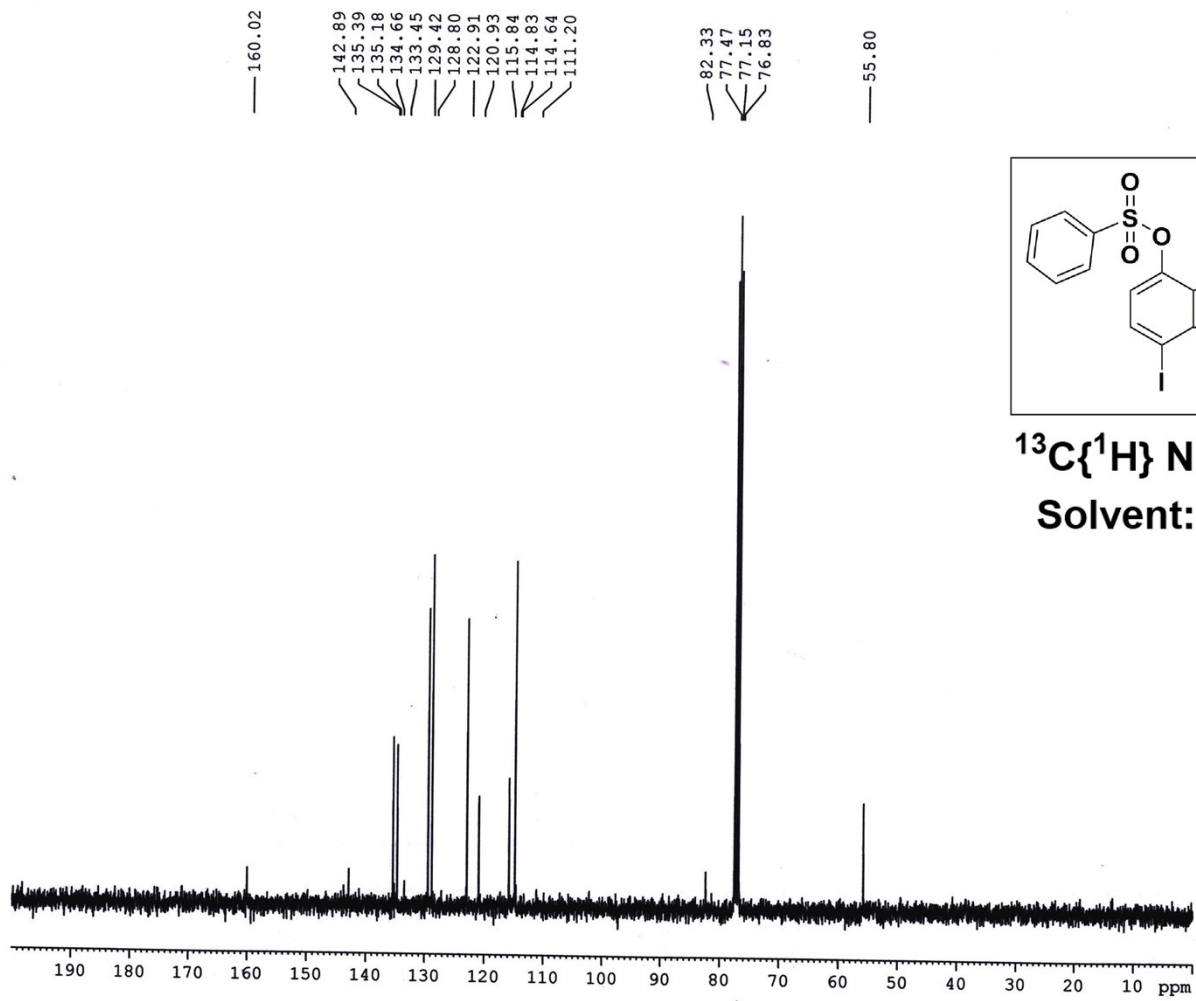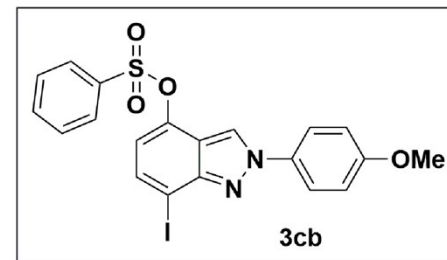

$^{13}\text{C}\{^1\text{H}\}$  NMR: 100 MHz  
 Solvent:  $\text{CDCl}_3$

8.407  
7.803  
7.884  
7.881  
7.869  
7.864  
7.857  
7.852  
7.846  
7.840  
7.835  
7.708  
7.690  
7.671  
7.620  
7.601  
7.565  
7.546  
7.526  
7.529  
7.532  
7.247  
7.240  
7.231  
7.221  
7.215  
7.210  
6.335  
6.336

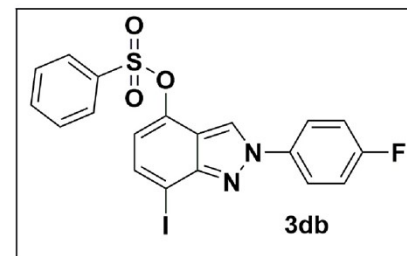

**<sup>1</sup>H NMR: 400 MHz**  
**Solvent: CDCl<sub>3</sub>**

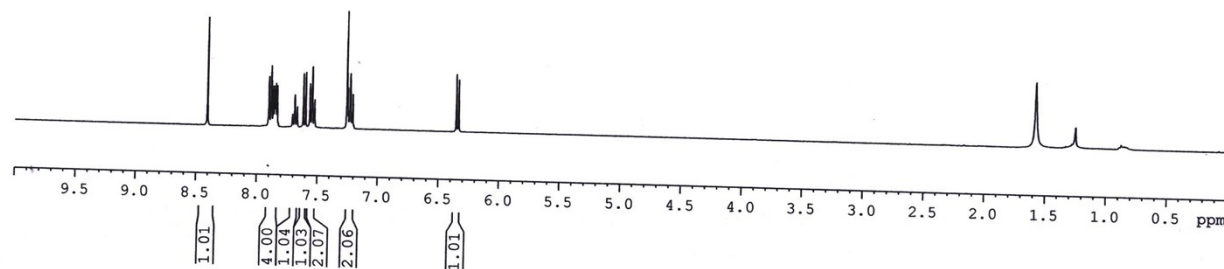

163.91  
161.43  
151.84  
142.92  
142.78  
135.80  
135.10  
134.72  
131.53  
129.45  
128.80  
123.41  
123.32  
121.33  
117.68  
116.86  
116.63  
116.10

82.43  
77.47  
77.15  
76.83

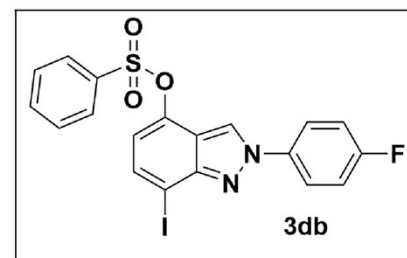

<sup>13</sup>C{<sup>1</sup>H} NMR: 100 MHz  
Solvent: CDCl<sub>3</sub>

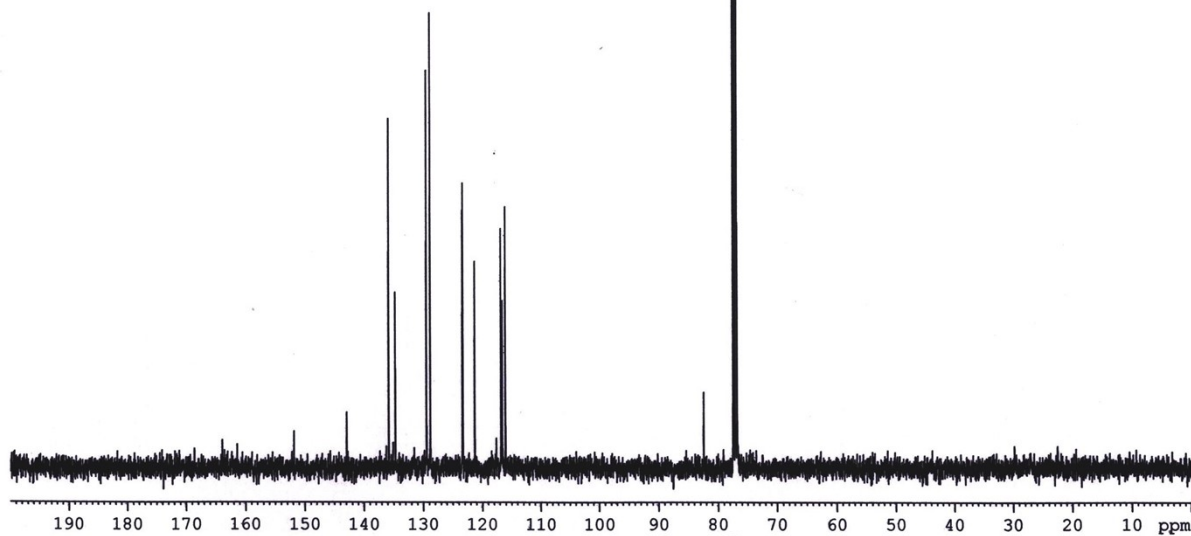

8.431  
7.903  
7.884  
7.853  
7.846  
7.842  
7.829  
7.824  
7.817  
7.708  
7.689  
7.671  
7.623  
7.604  
7.566  
7.546  
7.526  
7.521  
7.517  
7.503  
7.499  
7.492  
7.259  
6.356  
6.336

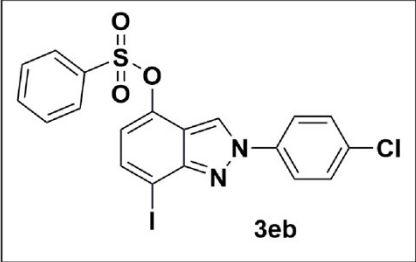

**<sup>1</sup>H NMR: 400 MHz**  
**Solvent: CDCl<sub>3</sub>**

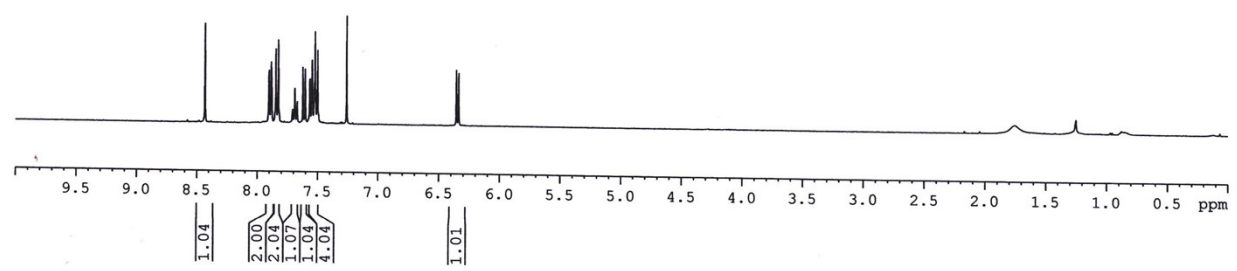

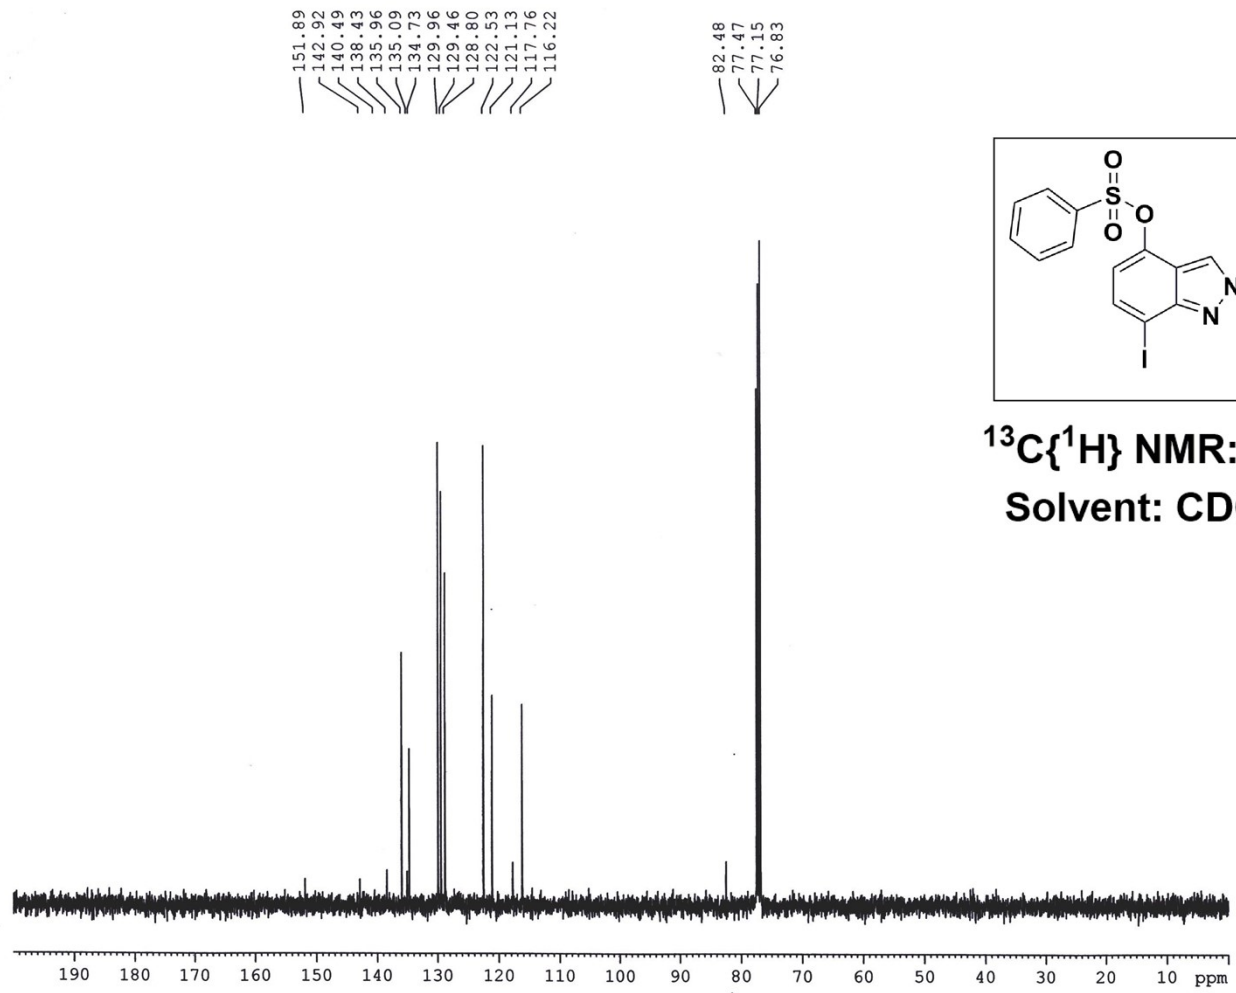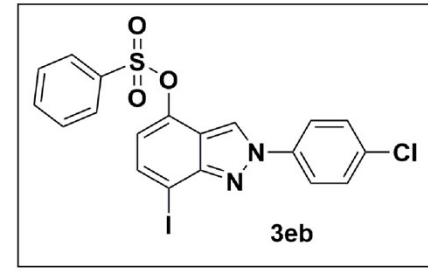

**$^{13}\text{C}\{^1\text{H}\}$  NMR: 100 MHz**  
**Solvent:  $\text{CDCl}_3$**



8.434  
7.904  
7.902  
7.884  
7.881  
7.793  
7.787  
7.782  
7.770  
7.765  
7.758  
7.707  
7.689  
7.681  
7.674  
7.657  
7.652  
7.645  
7.624  
7.604  
7.565  
7.545  
7.526  
7.260  
6.357  
6.338

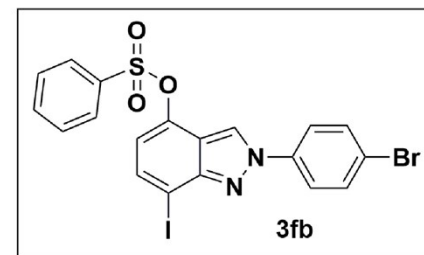

$^1\text{H}$  NMR: 400 MHz  
Solvent:  $\text{CDCl}_3$

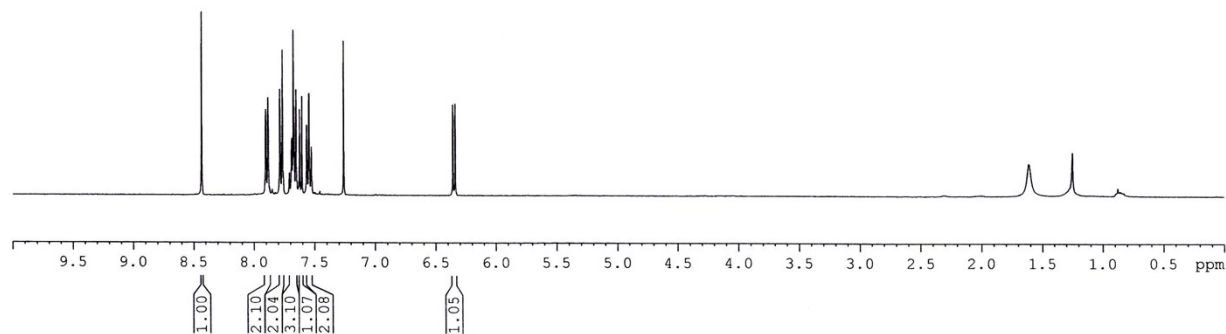

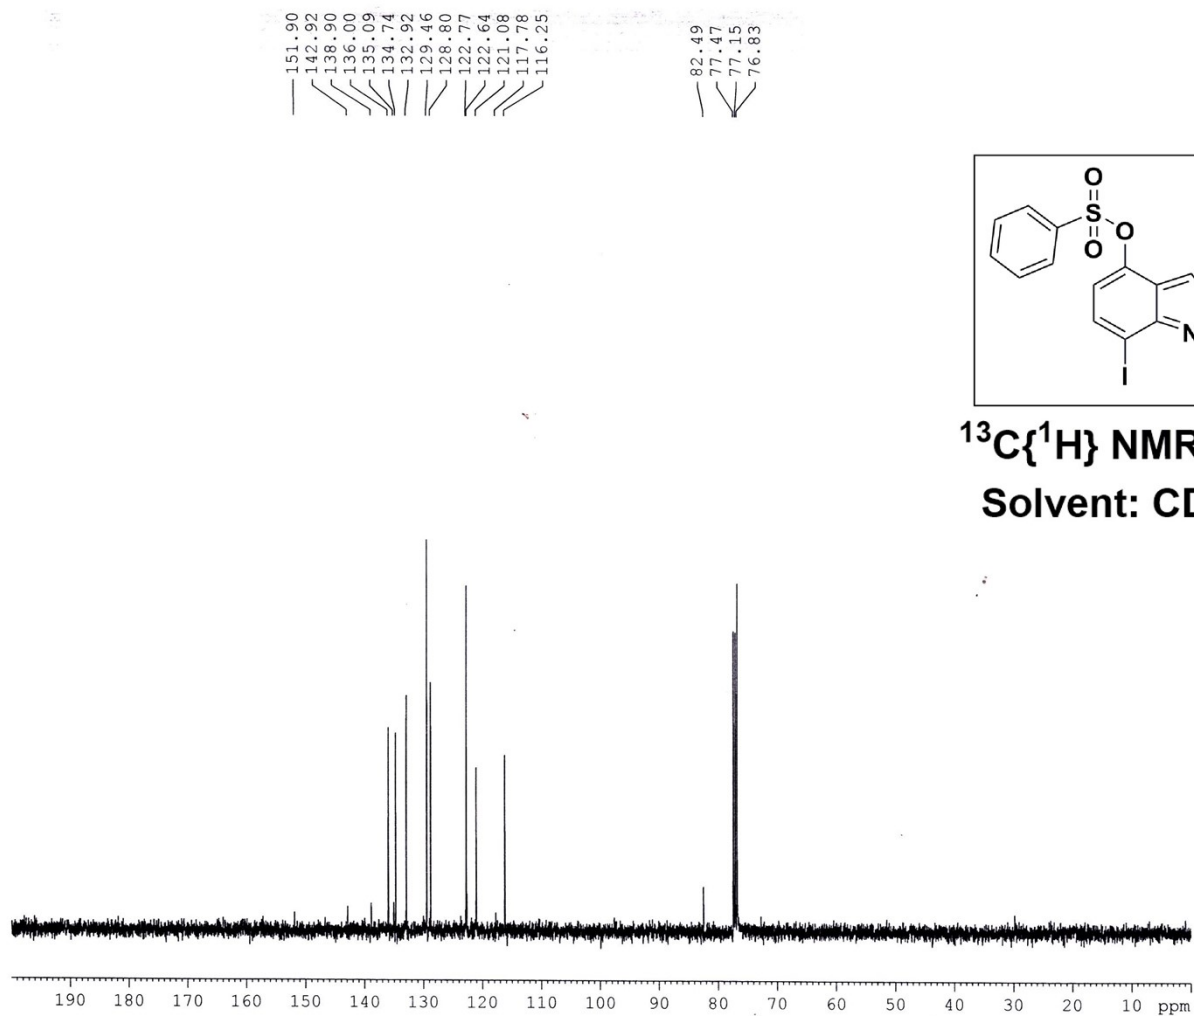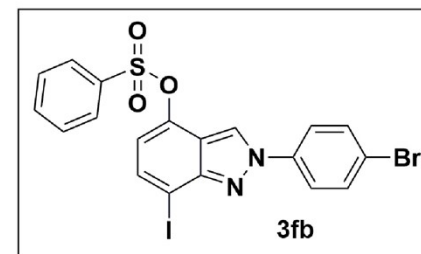

8.408  
7.907  
7.888  
7.885  
7.699  
7.683  
7.664  
7.631  
7.618  
7.598  
7.561  
7.541  
7.522  
7.423  
7.404  
7.384  
7.259  
7.239  
6.374  
6.355

— 2.476

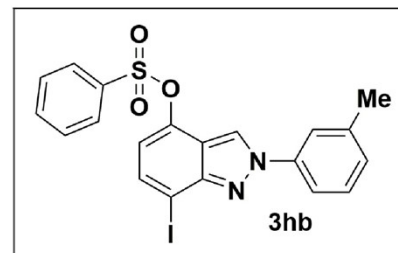

**<sup>1</sup>H NMR: 400 MHz**  
**Solvent: CDCl<sub>3</sub>**

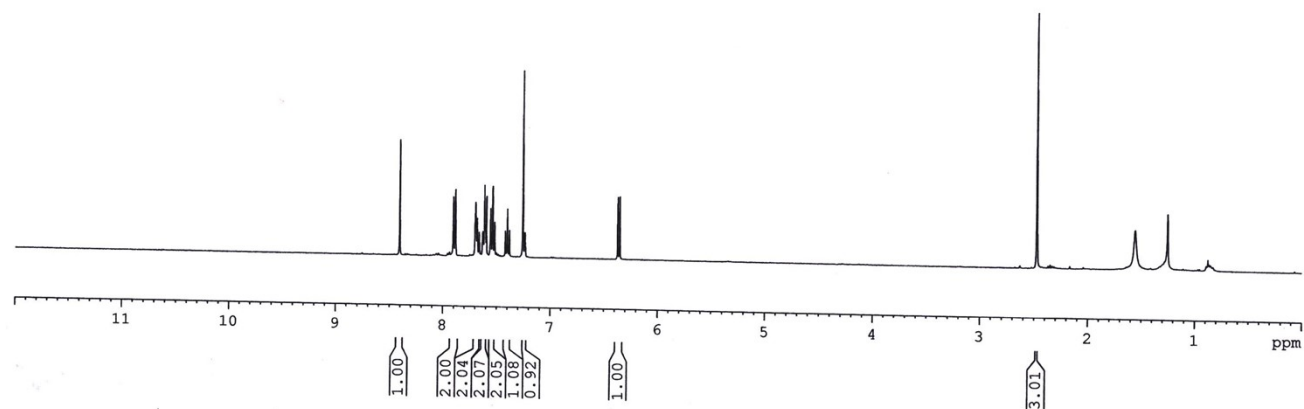

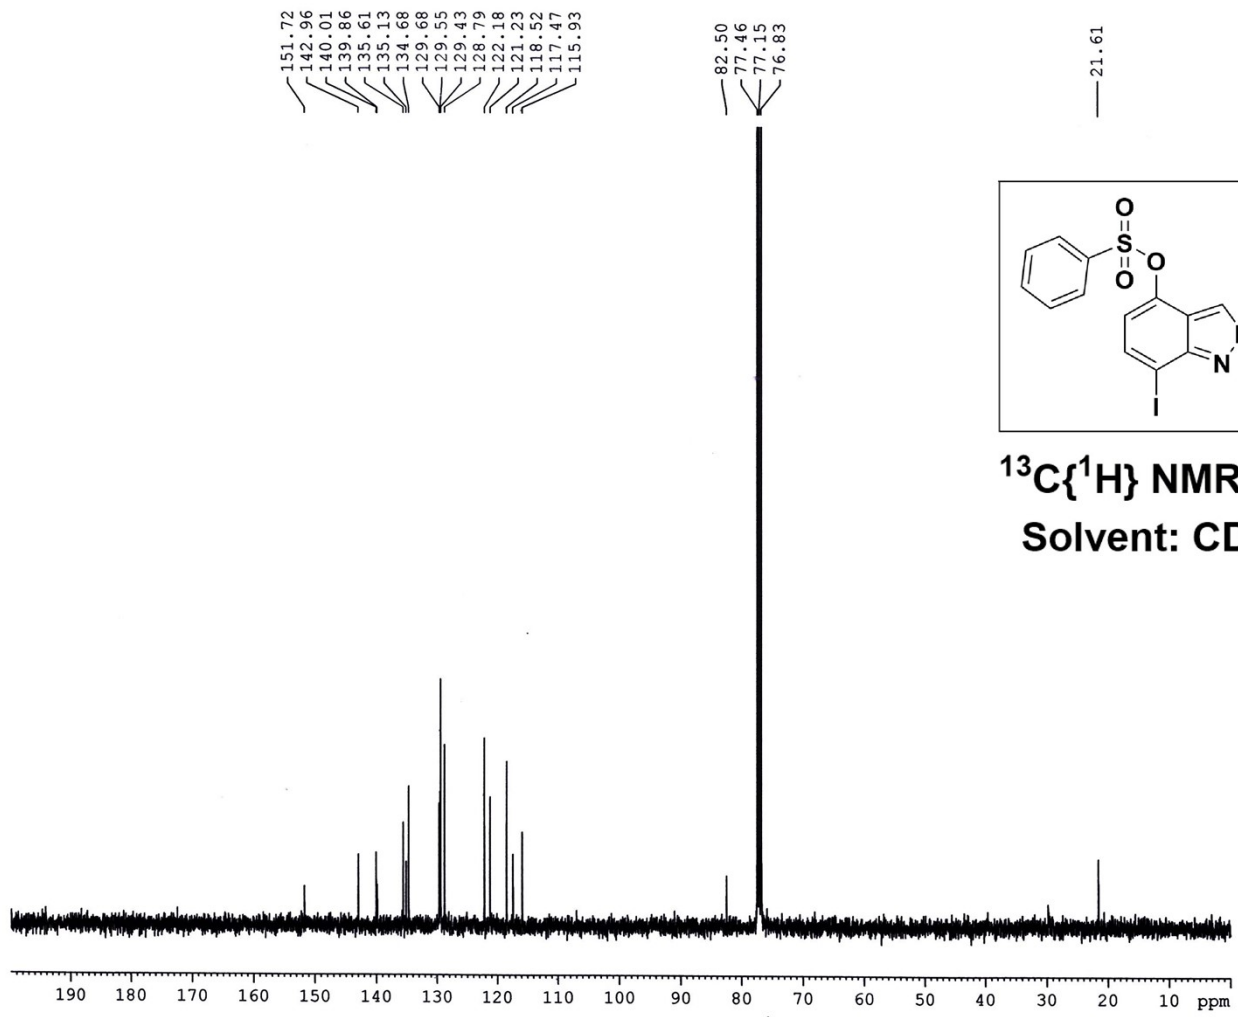

8.405  
 8.000  
 7.993  
 7.984  
 7.977  
 7.906  
 7.888  
 7.884  
 7.779  
 7.772  
 7.769  
 7.762  
 7.757  
 7.750  
 7.747  
 7.740  
 7.724  
 7.705  
 7.686  
 7.632  
 7.613  
 7.577  
 7.558  
 7.538  
 7.337  
 7.316  
 7.294  
 7.259  
 6.356  
 6.337

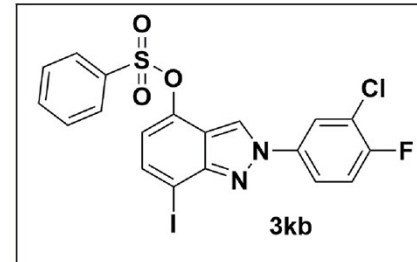

<sup>1</sup>H NMR: 400 MHz  
 Solvent: CDCl<sub>3</sub>

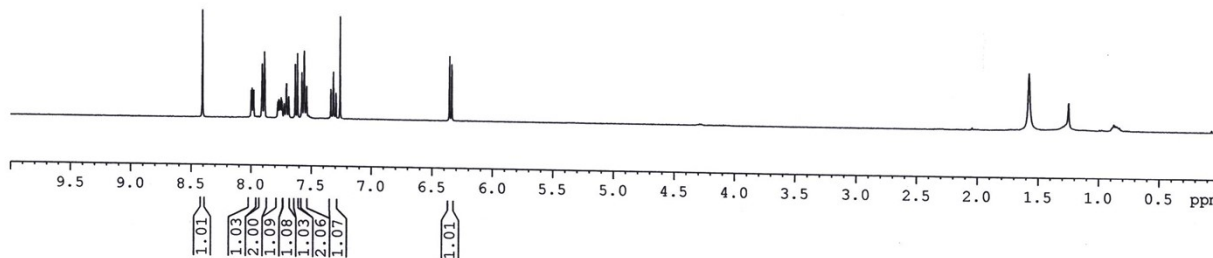

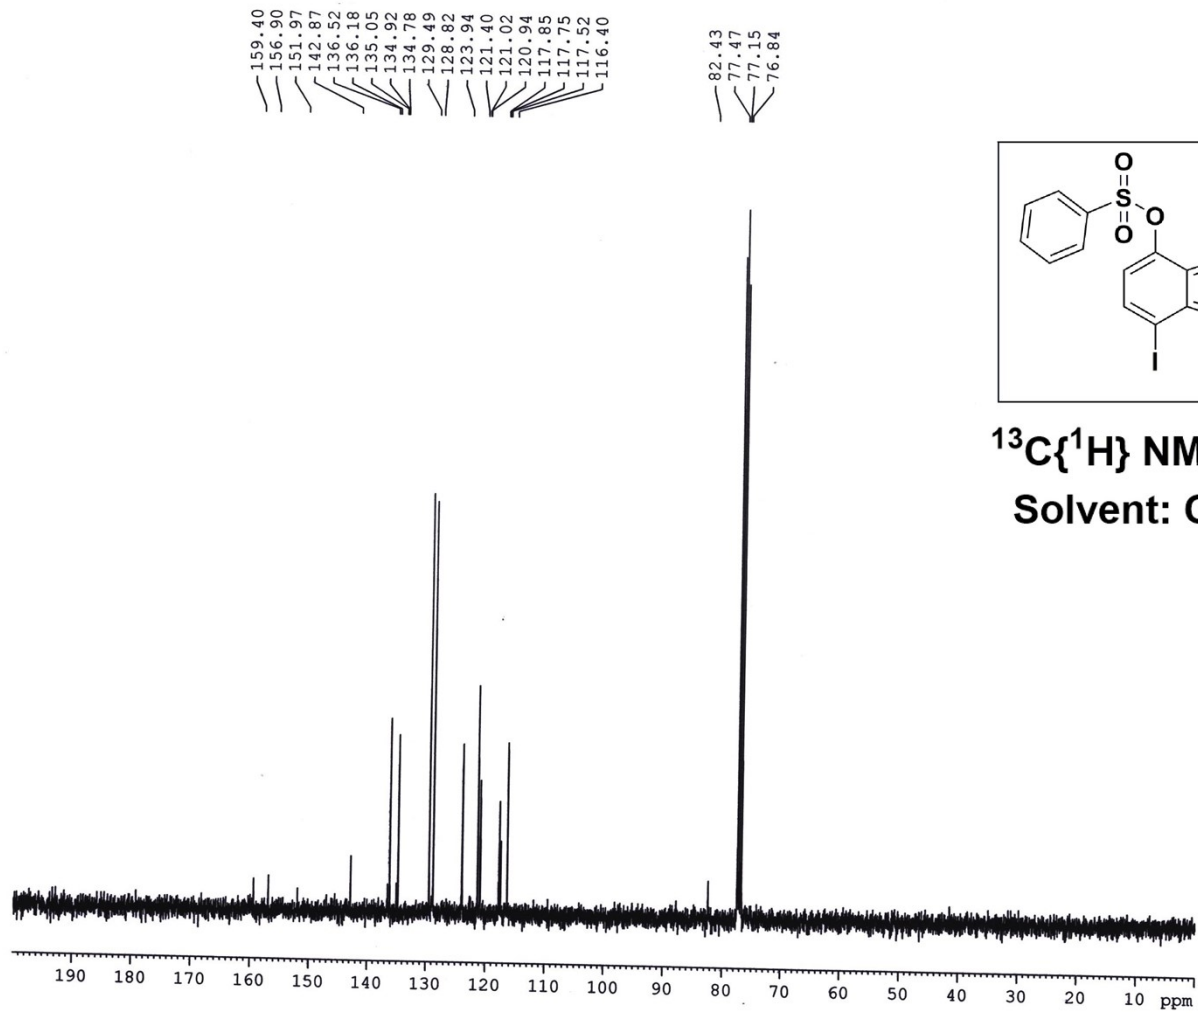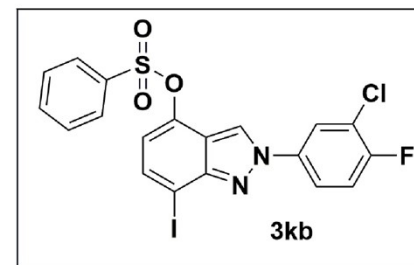

$^{13}\text{C}\{^1\text{H}\}$  NMR: 100 MHz  
Solvent:  $\text{CDCl}_3$

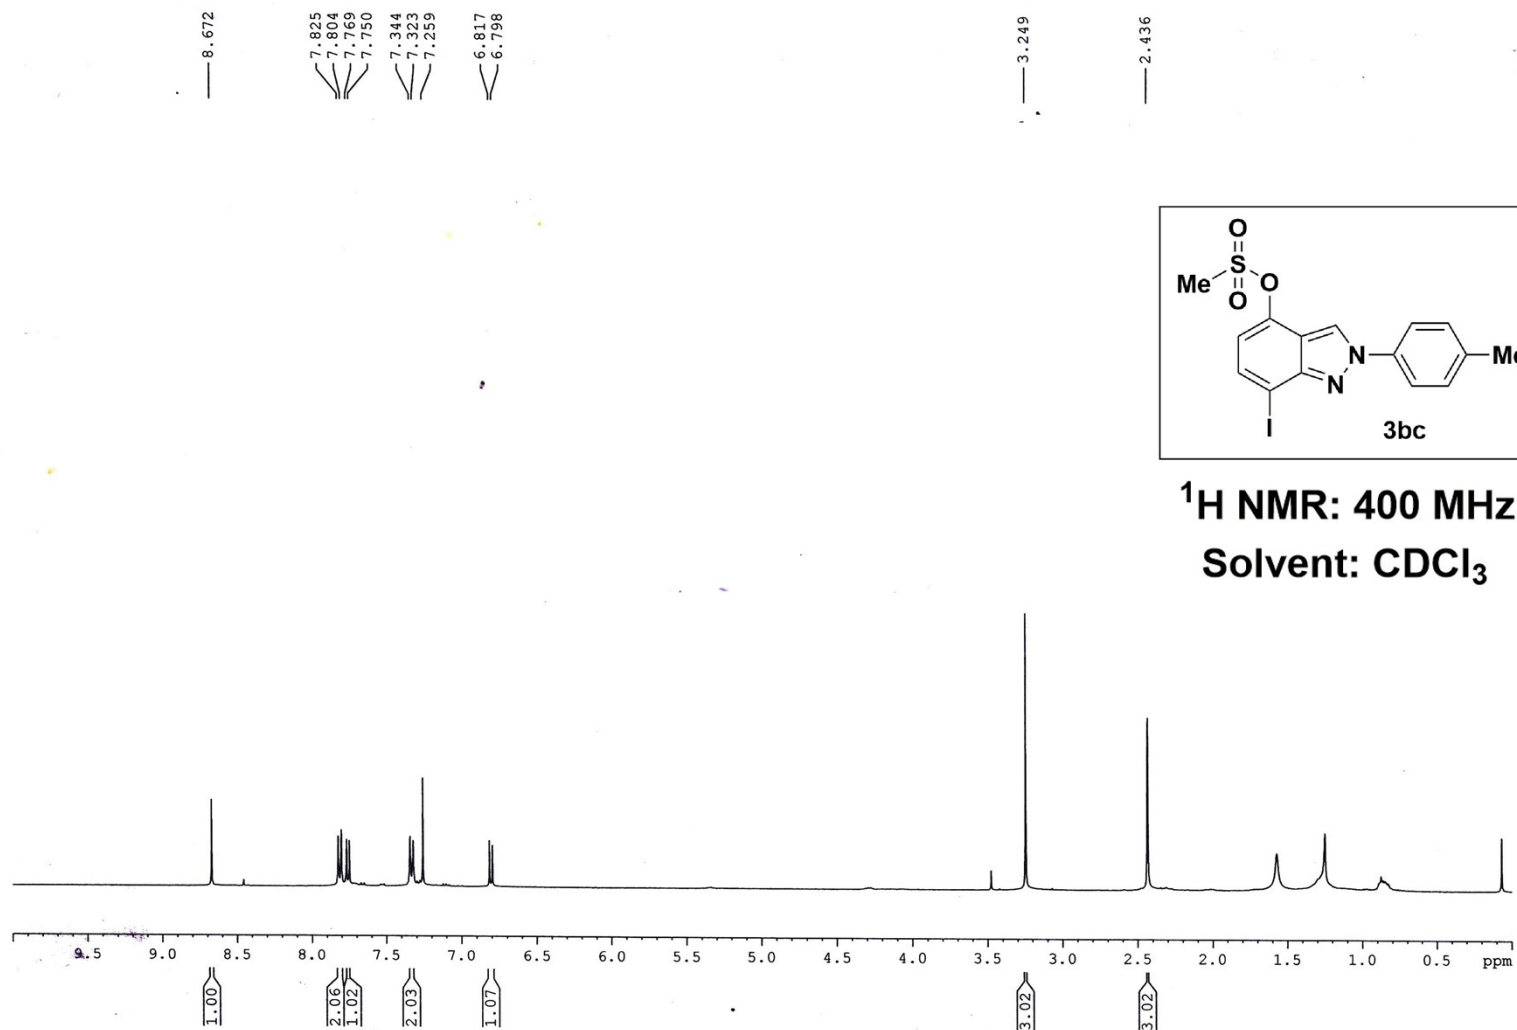

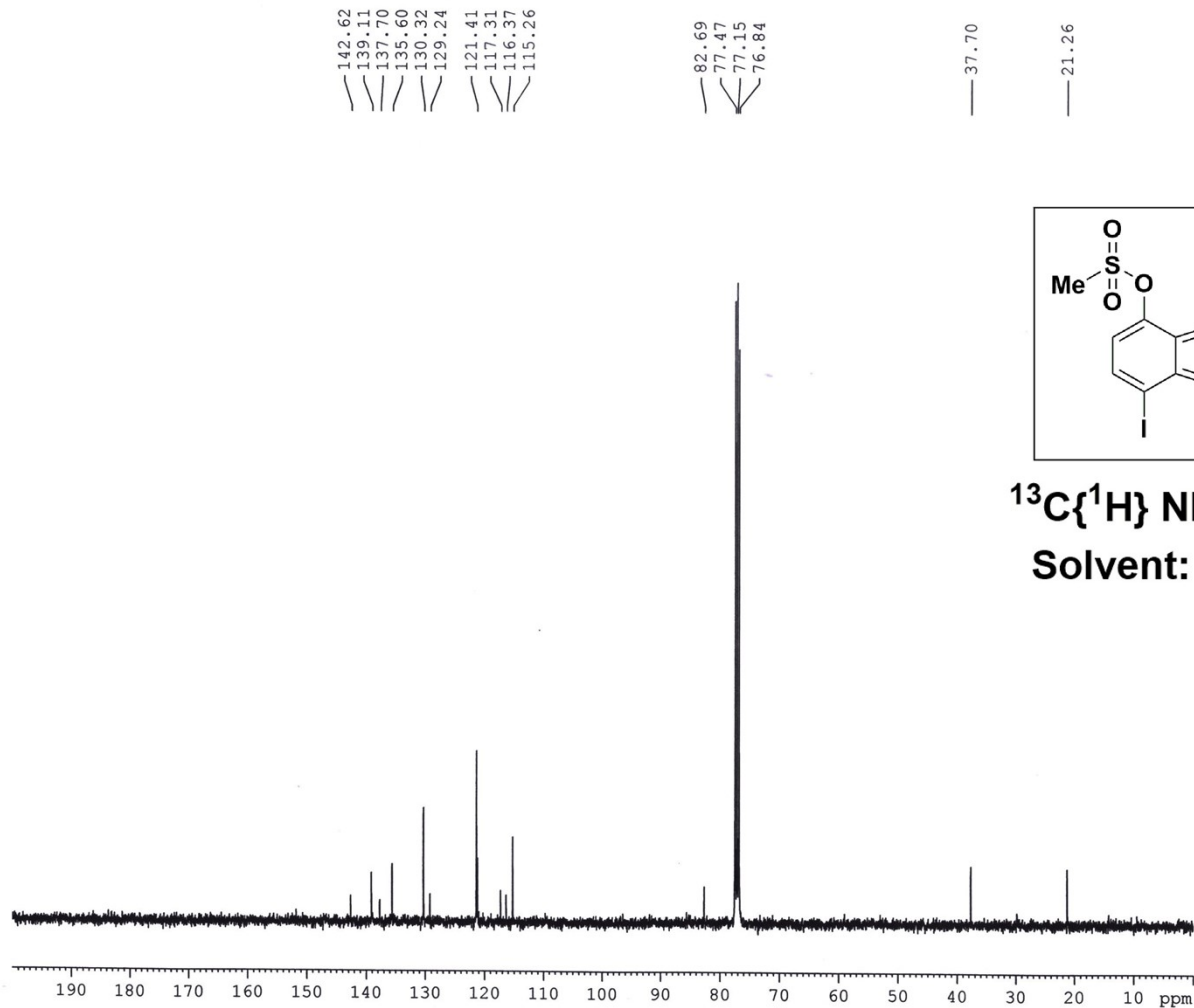



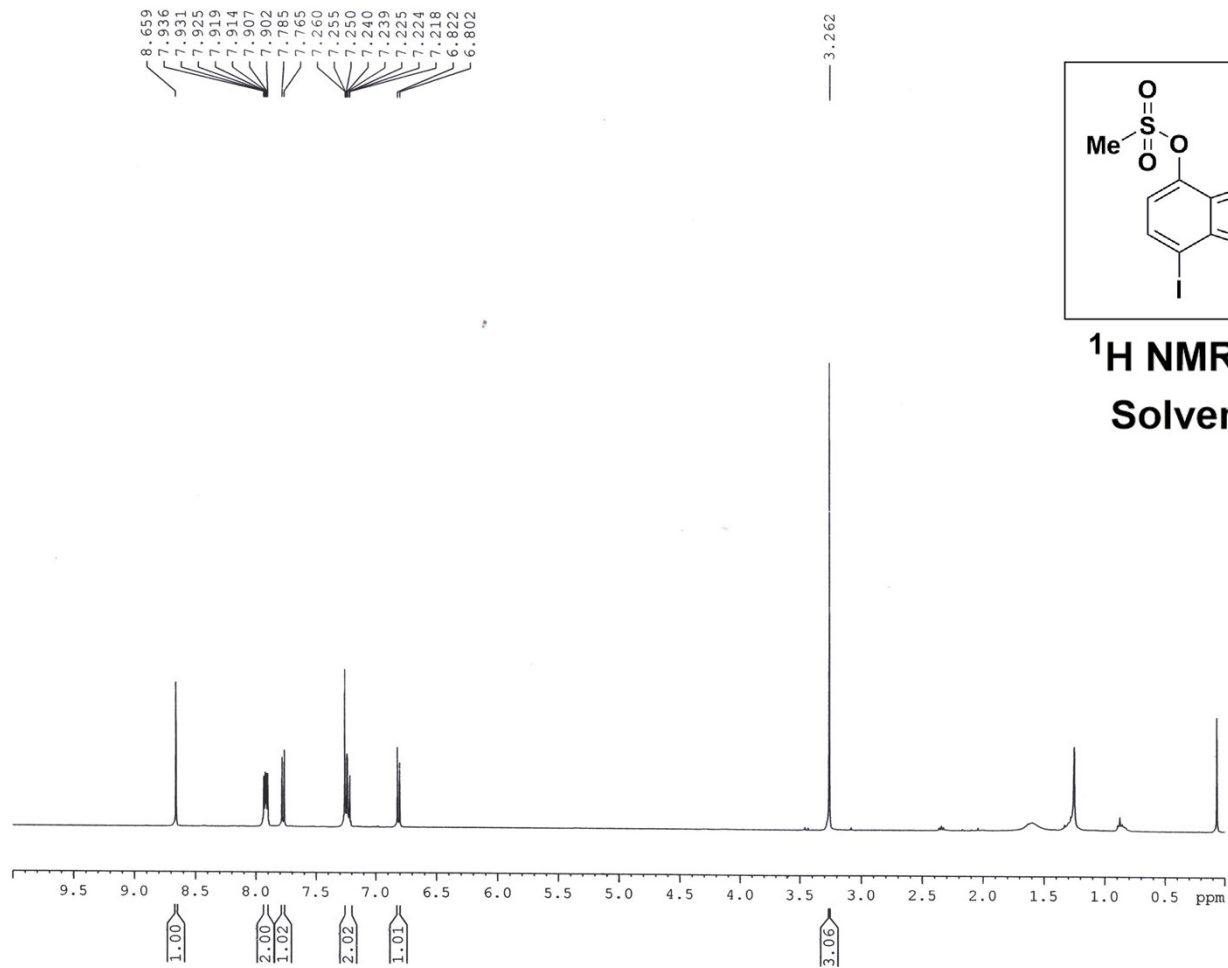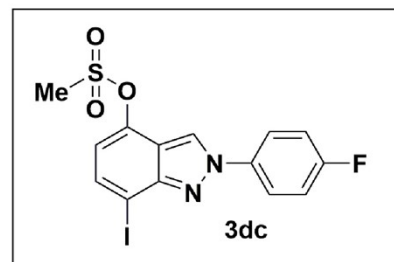

**$^1\text{H}$  NMR: 400 MHz**  
**Solvent:  $\text{CDCl}_3$**

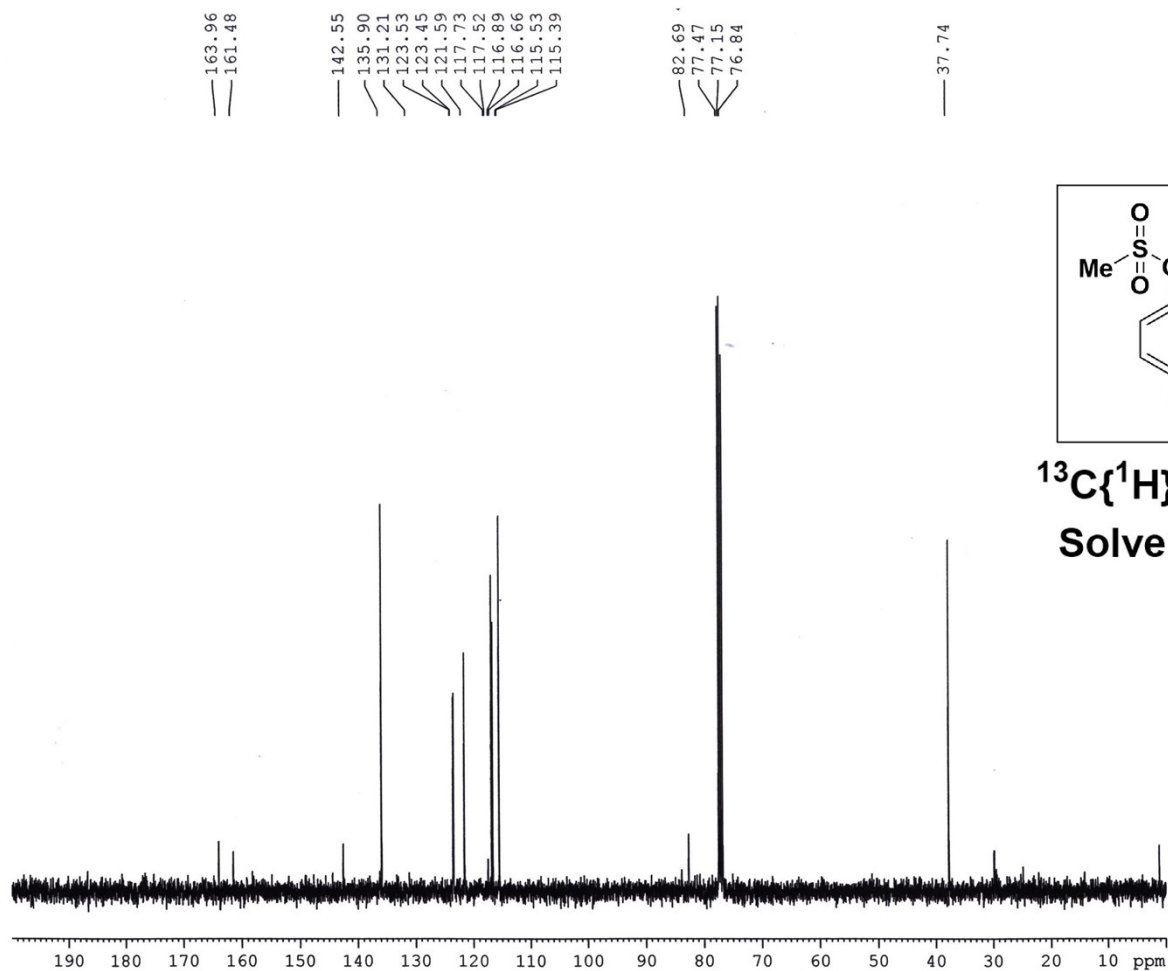

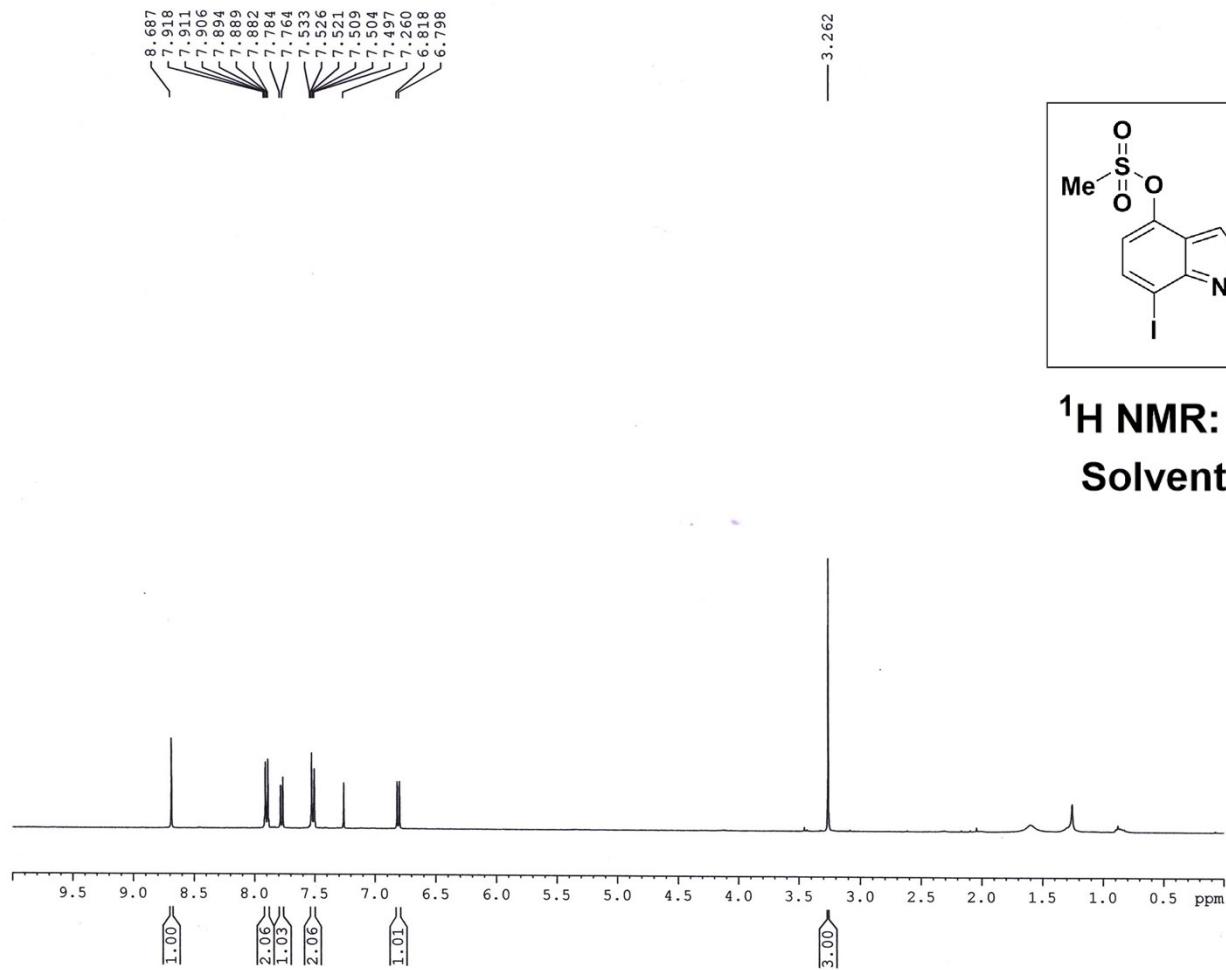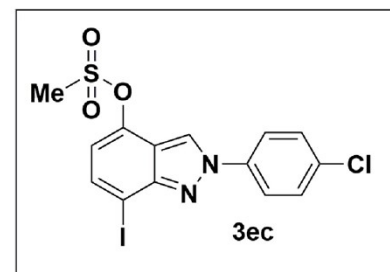

**<sup>1</sup>H NMR: 400 MHz**  
**Solvent: CDCl<sub>3</sub>**

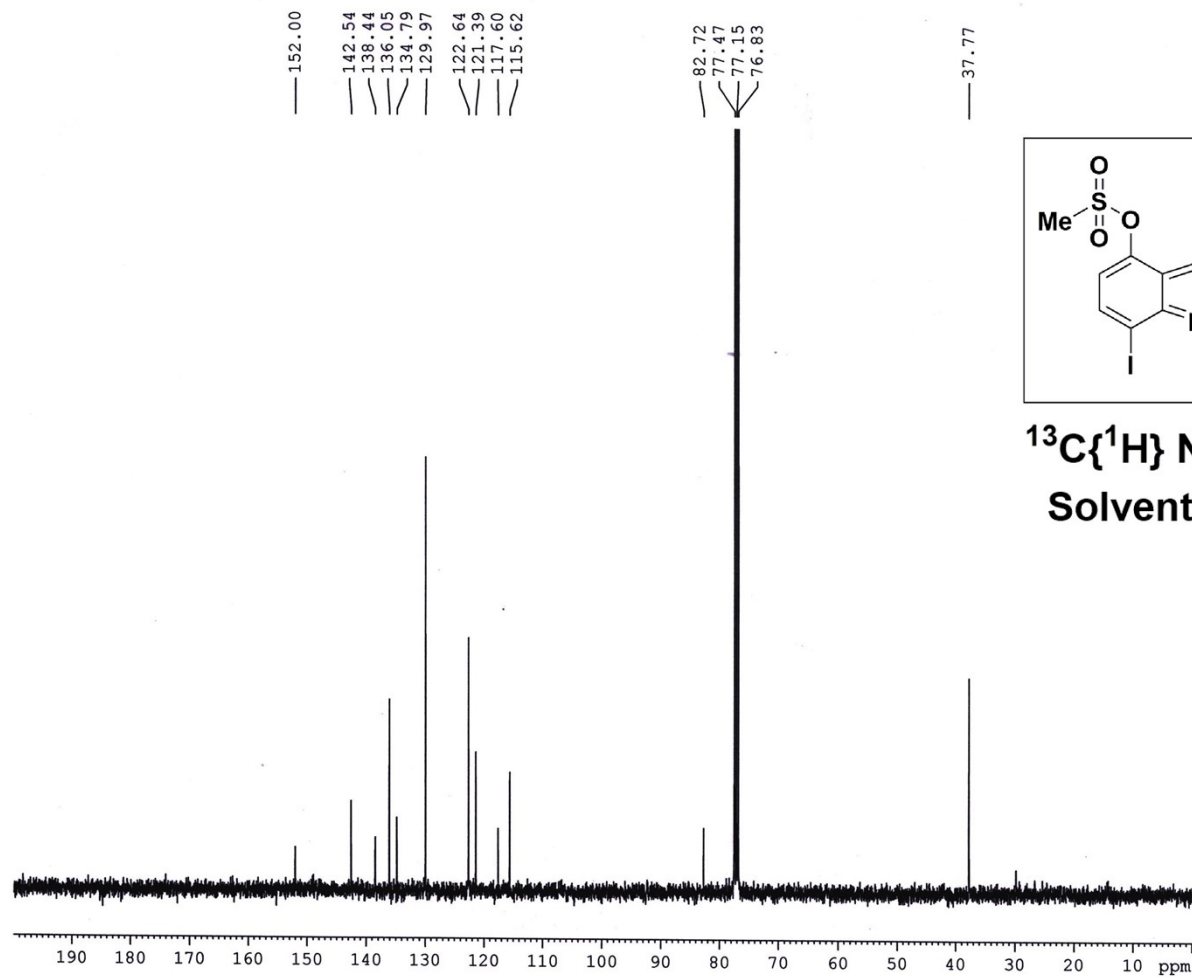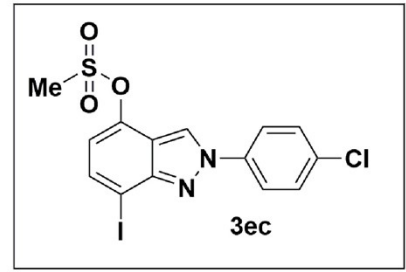

**$^{13}\text{C}\{^1\text{H}\}$  NMR: 100 MHz**  
**Solvent:  $\text{CDCl}_3$**

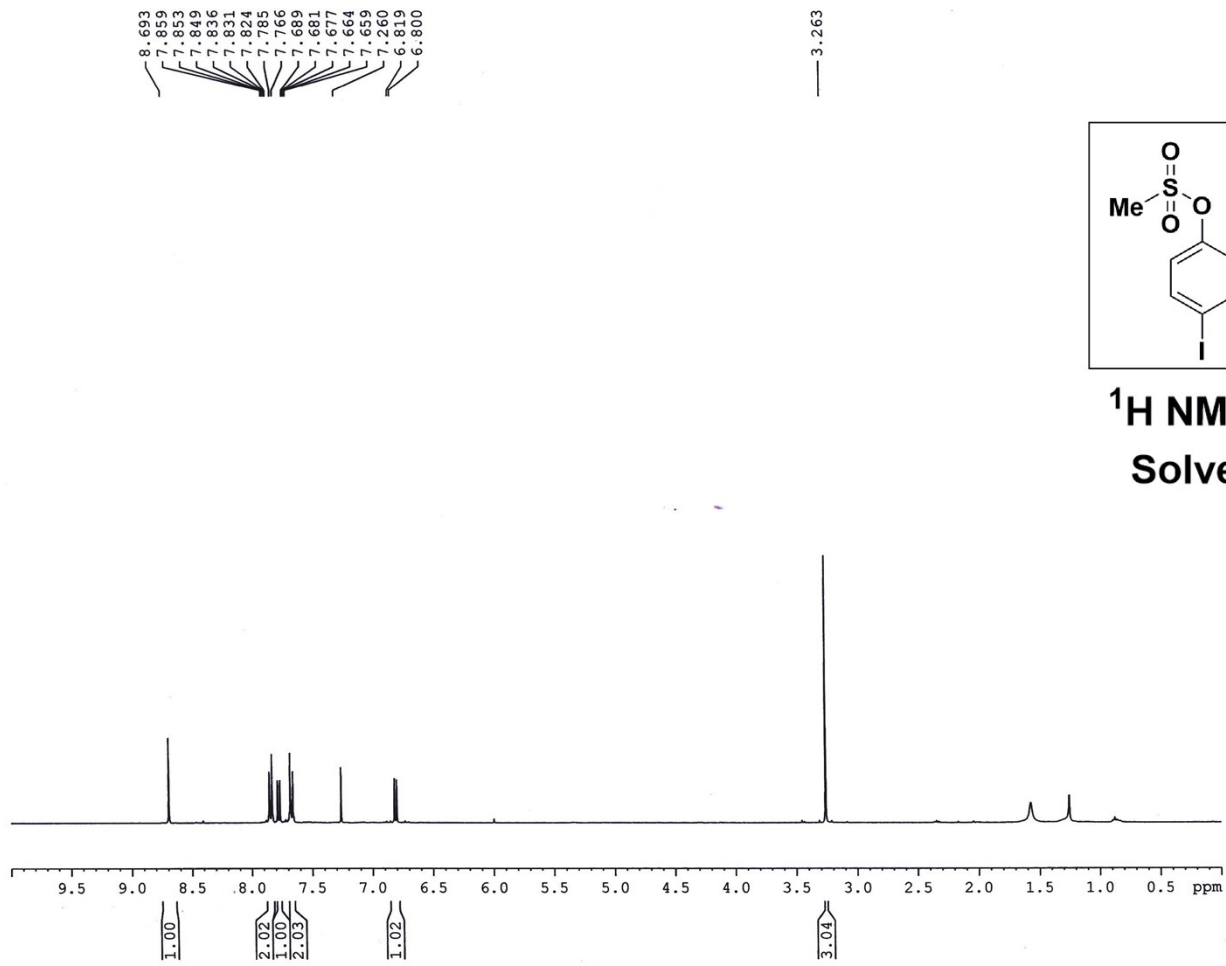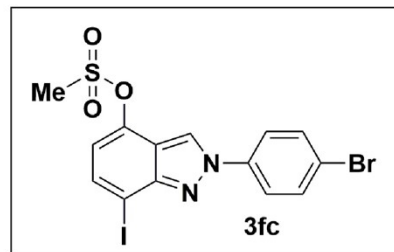

**<sup>1</sup>H NMR: 400 MHz**  
**Solvent: CDCl<sub>3</sub>**

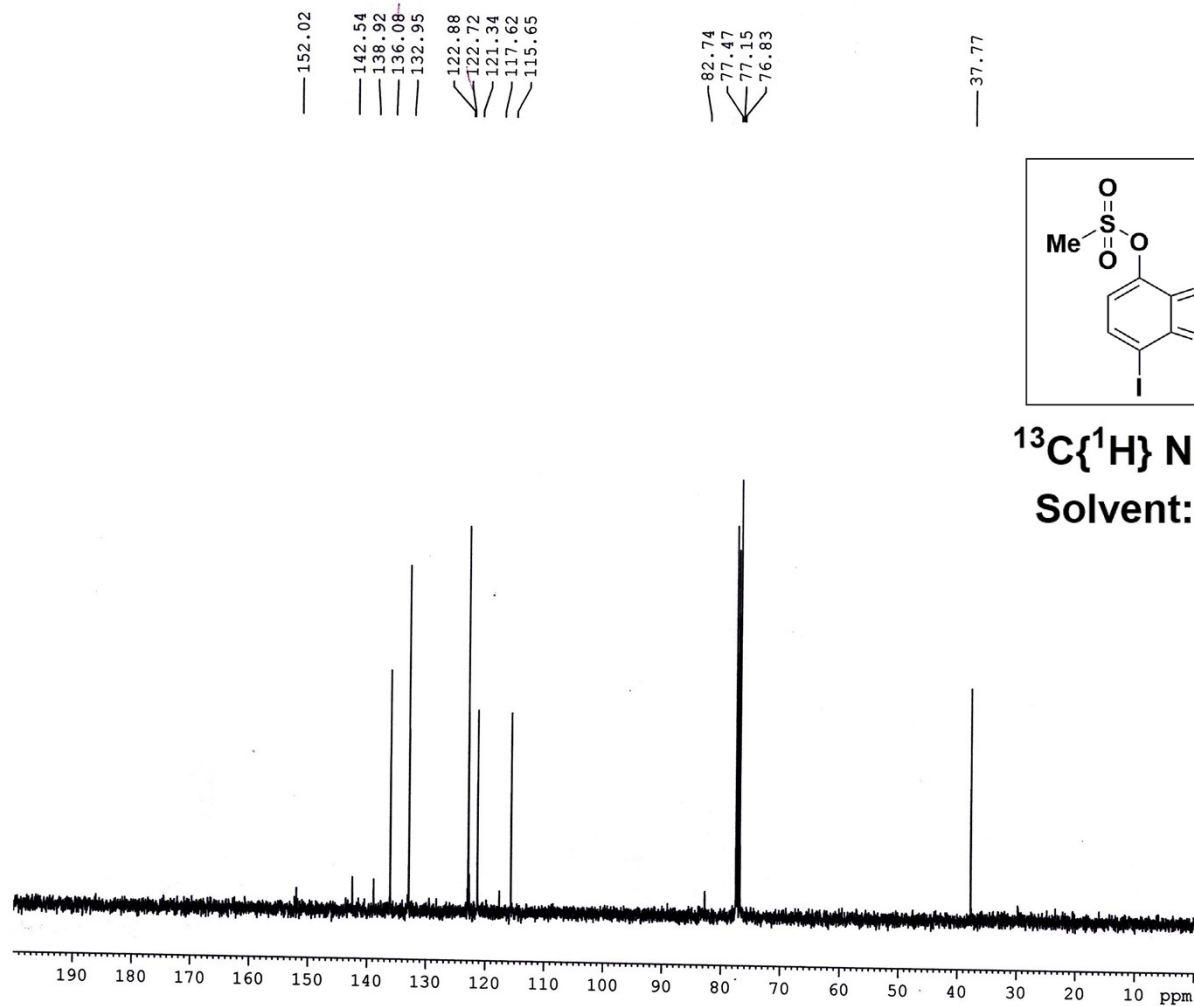

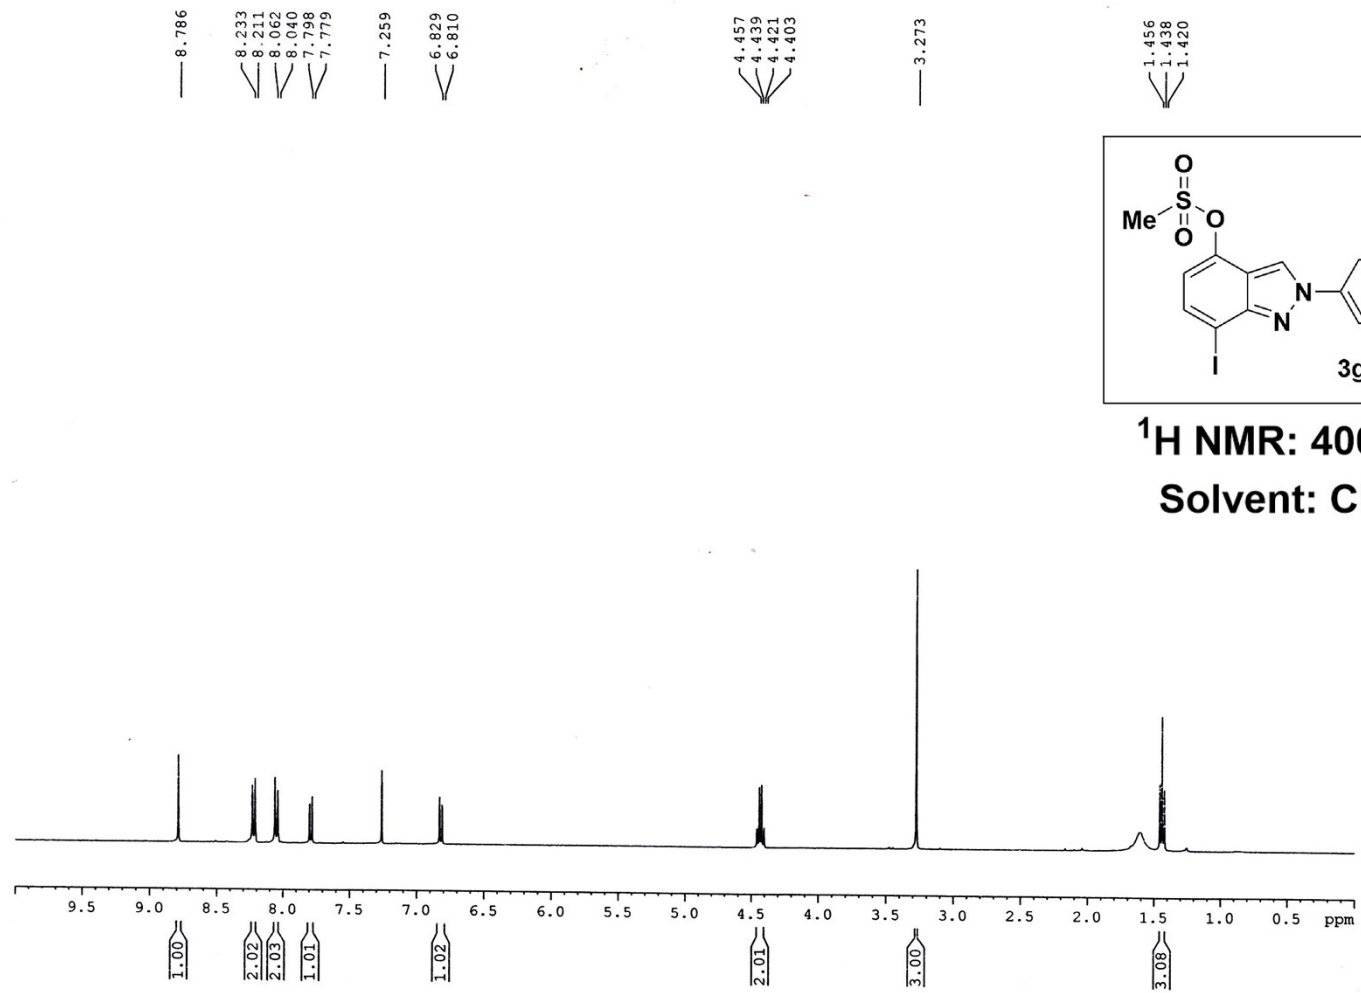

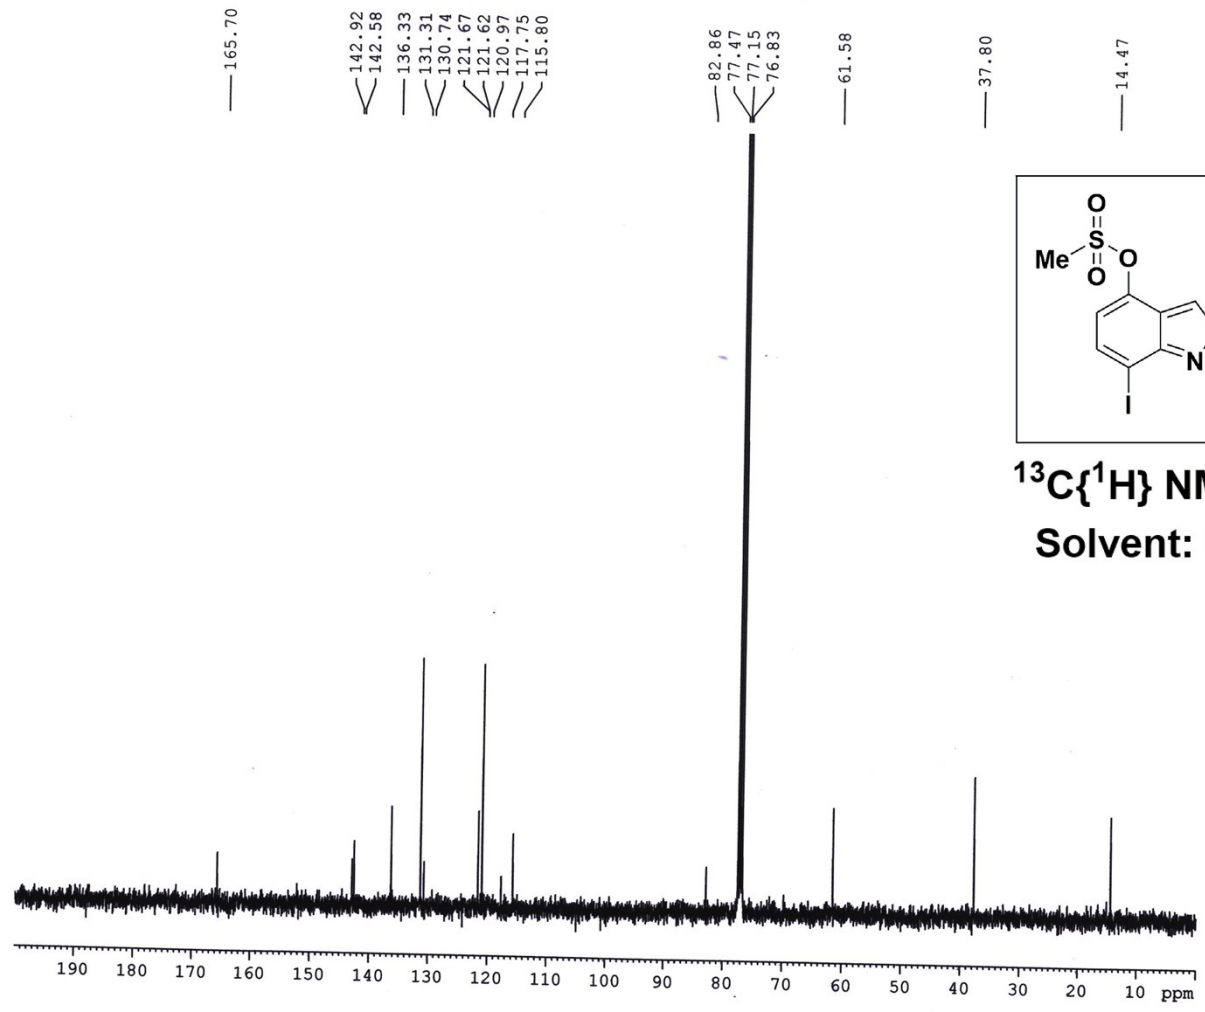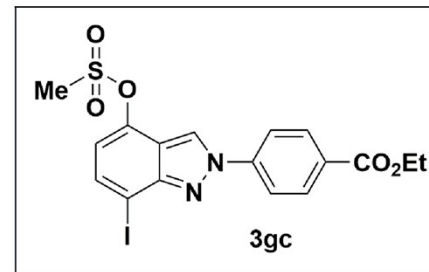

$^{13}\text{C}\{^1\text{H}\}$  NMR: 100 MHz  
Solvent:  $\text{CDCl}_3$



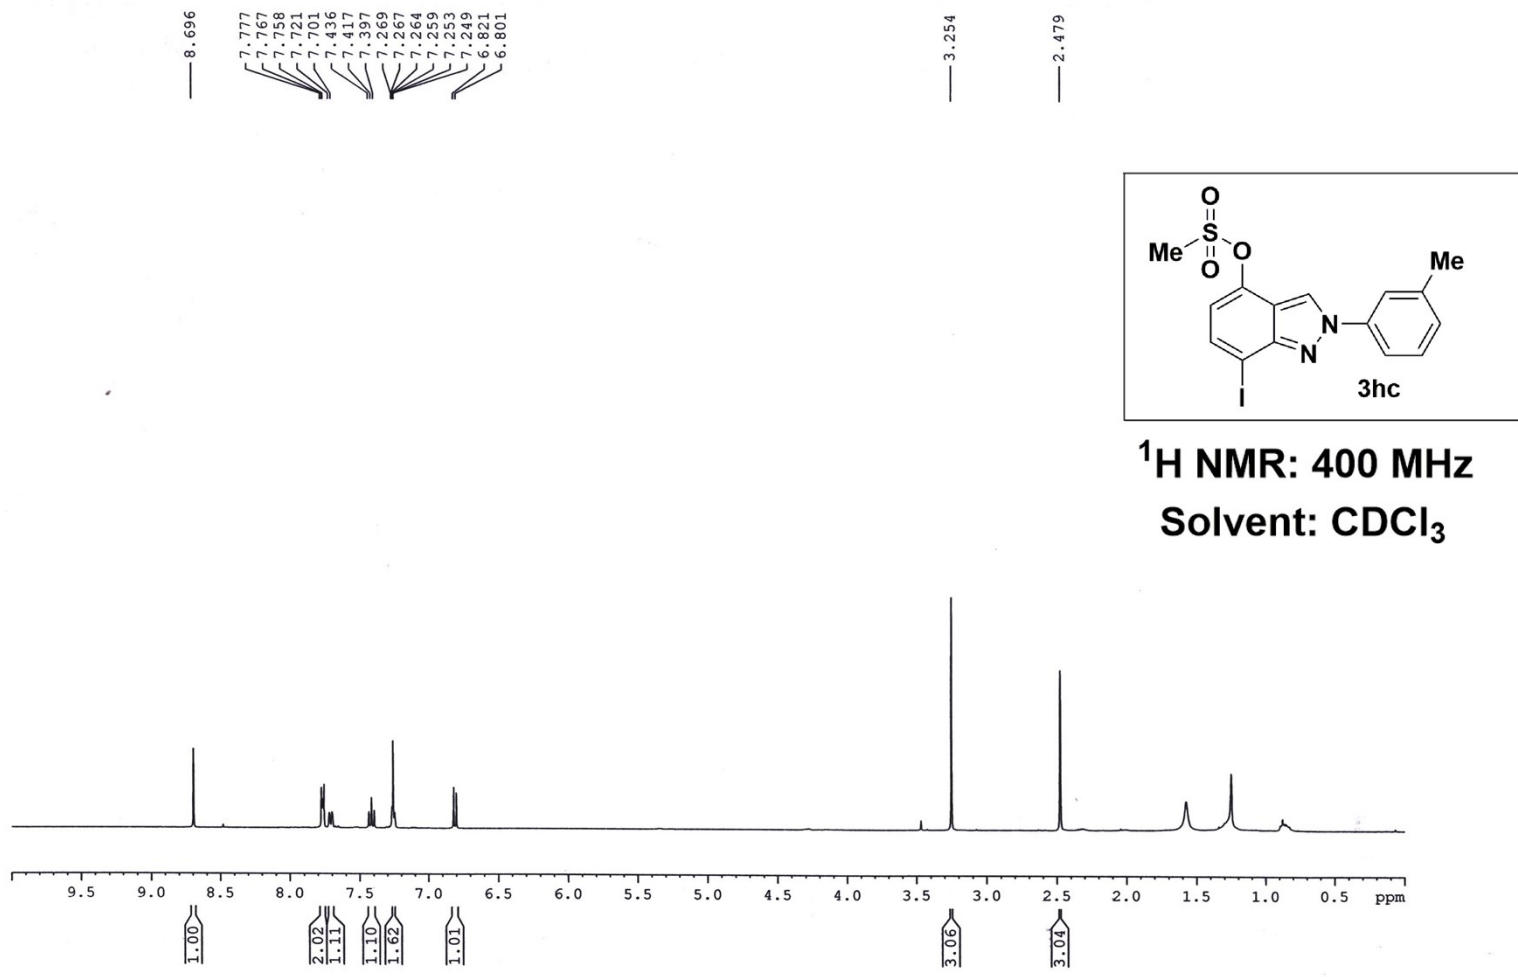

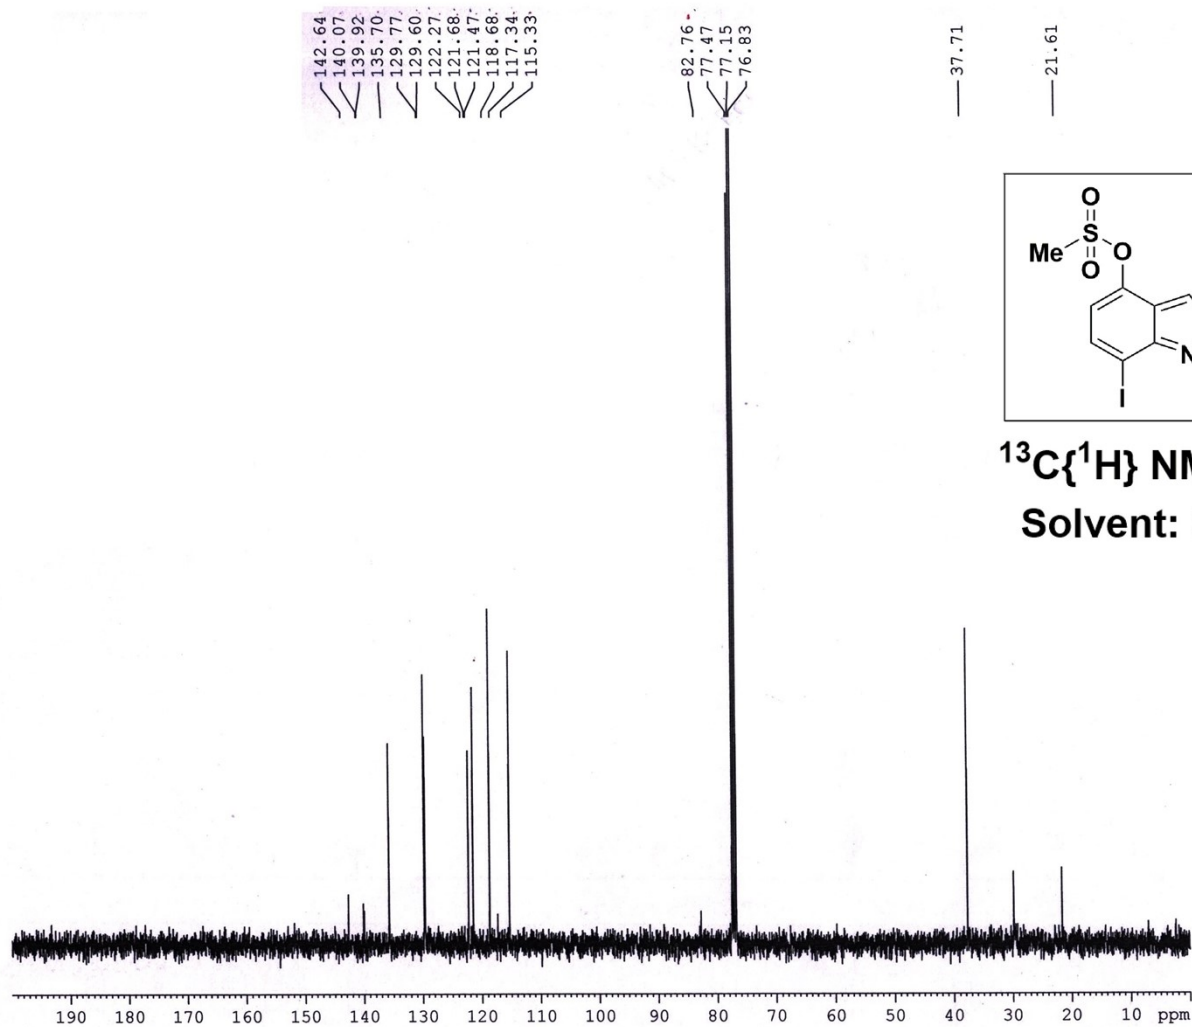

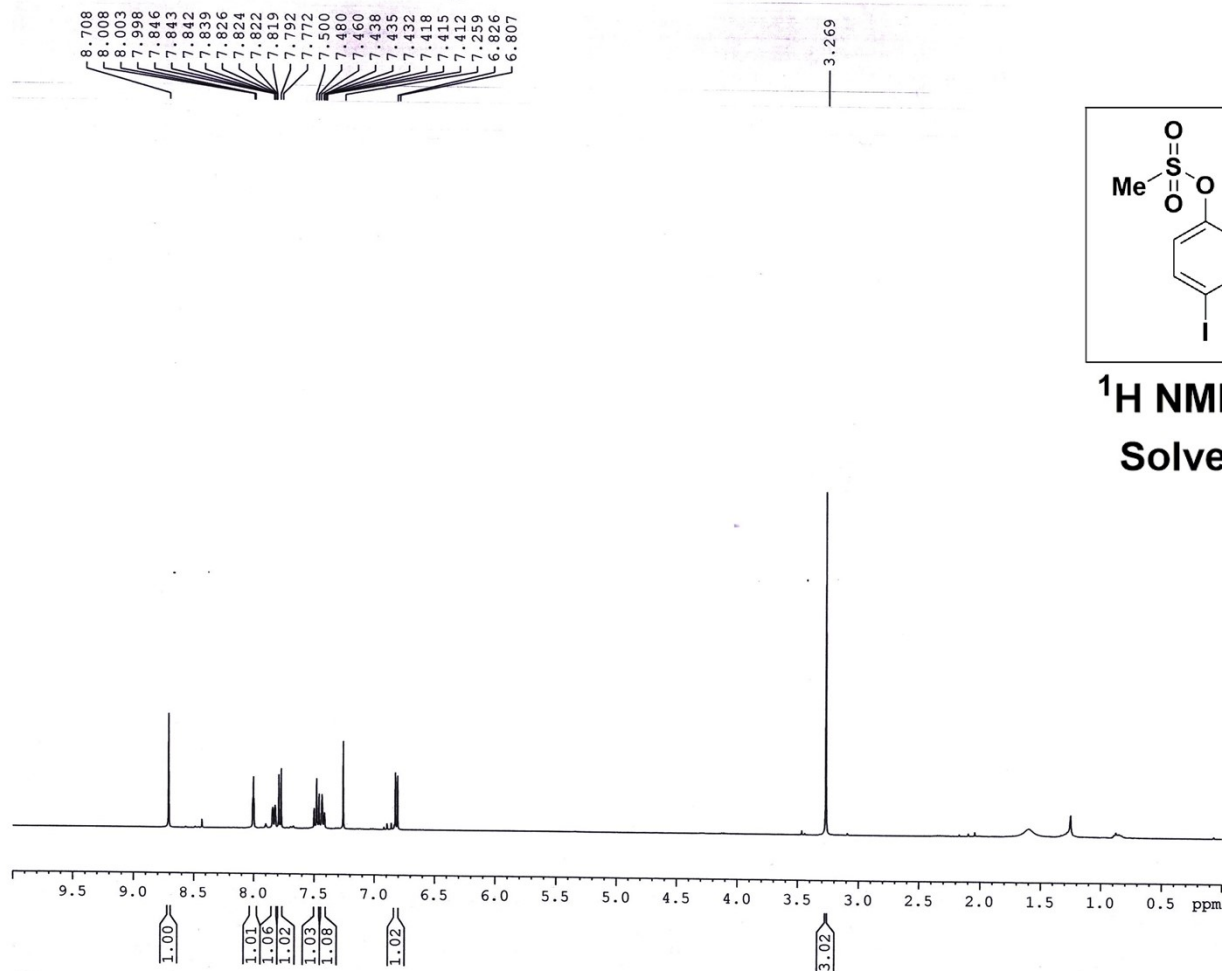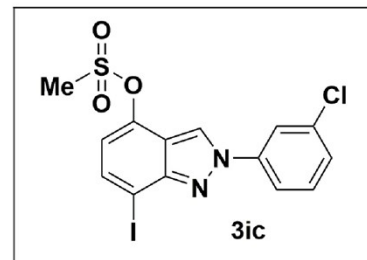

**$^1\text{H}$  NMR: 400 MHz**  
**Solvent:  $\text{CDCl}_3$**

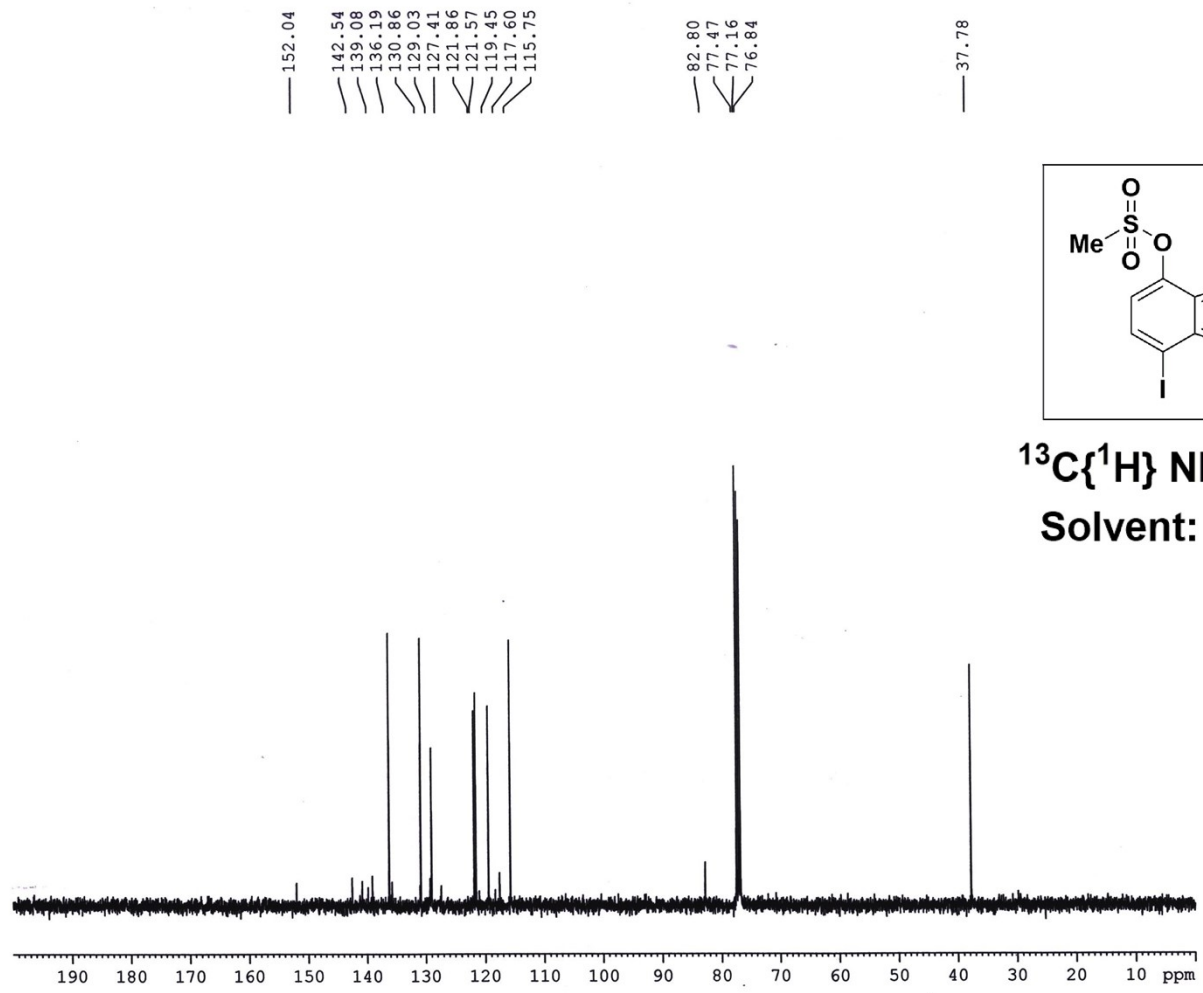

8.293  
7.791  
7.771  
7.722  
7.701  
7.626  
7.606  
7.340  
7.319  
7.297  
7.260

6.424  
6.404

2.740  
2.721  
2.703  
2.684  
2.427

1.242  
1.223  
1.204

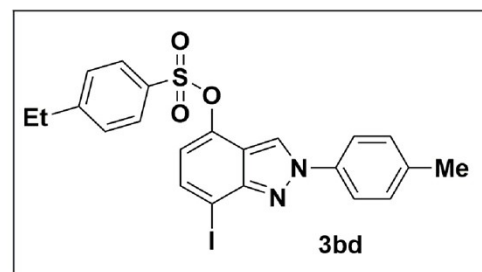

<sup>1</sup>H NMR: 400 MHz  
Solvent: CDCl<sub>3</sub>

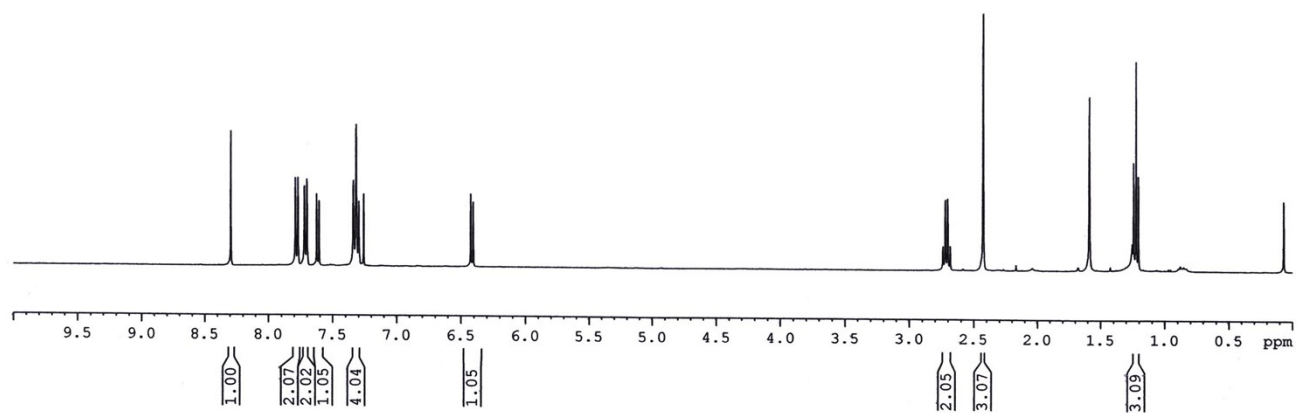

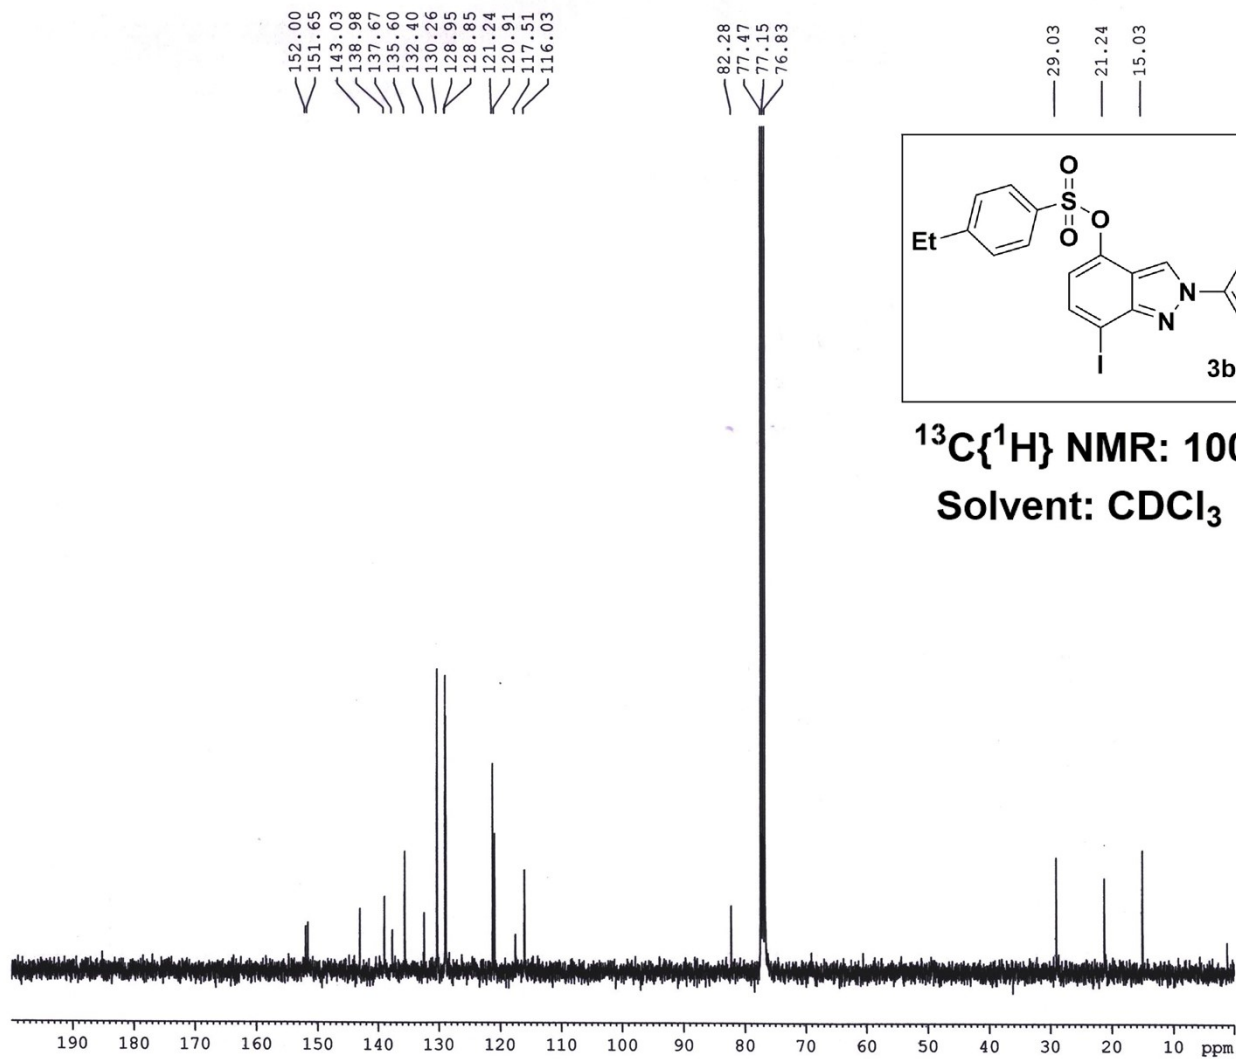

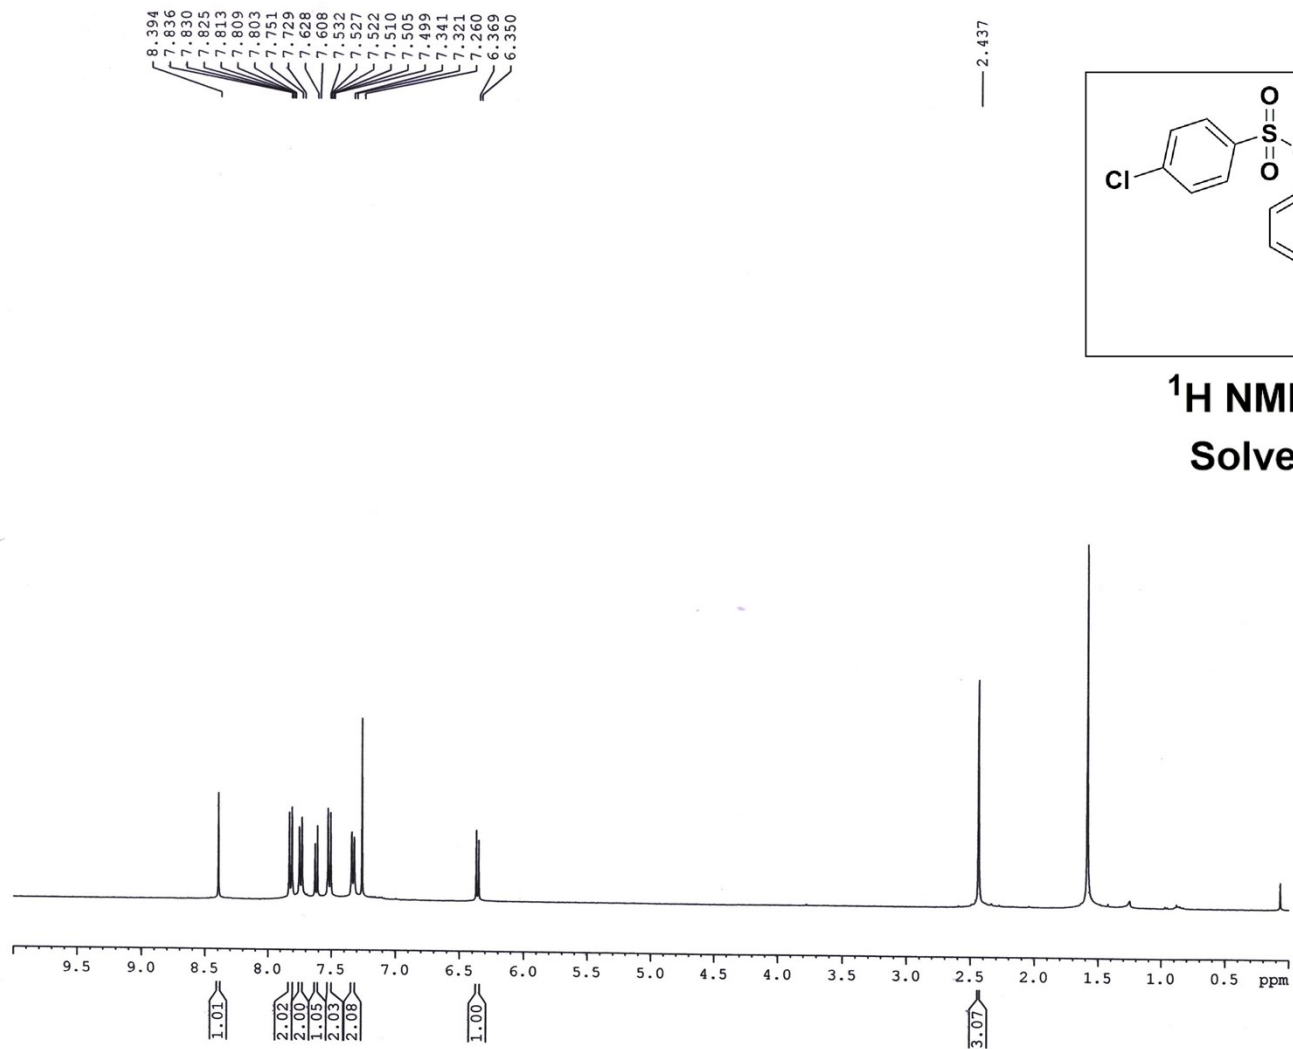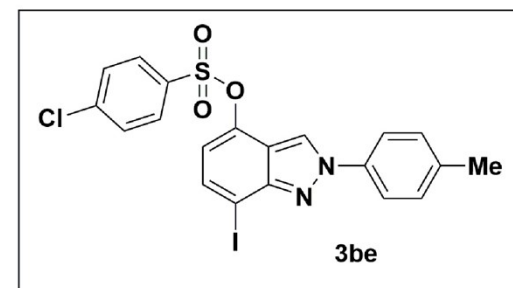

**<sup>1</sup>H NMR: 400 MHz**  
**Solvent: CDCl<sub>3</sub>**

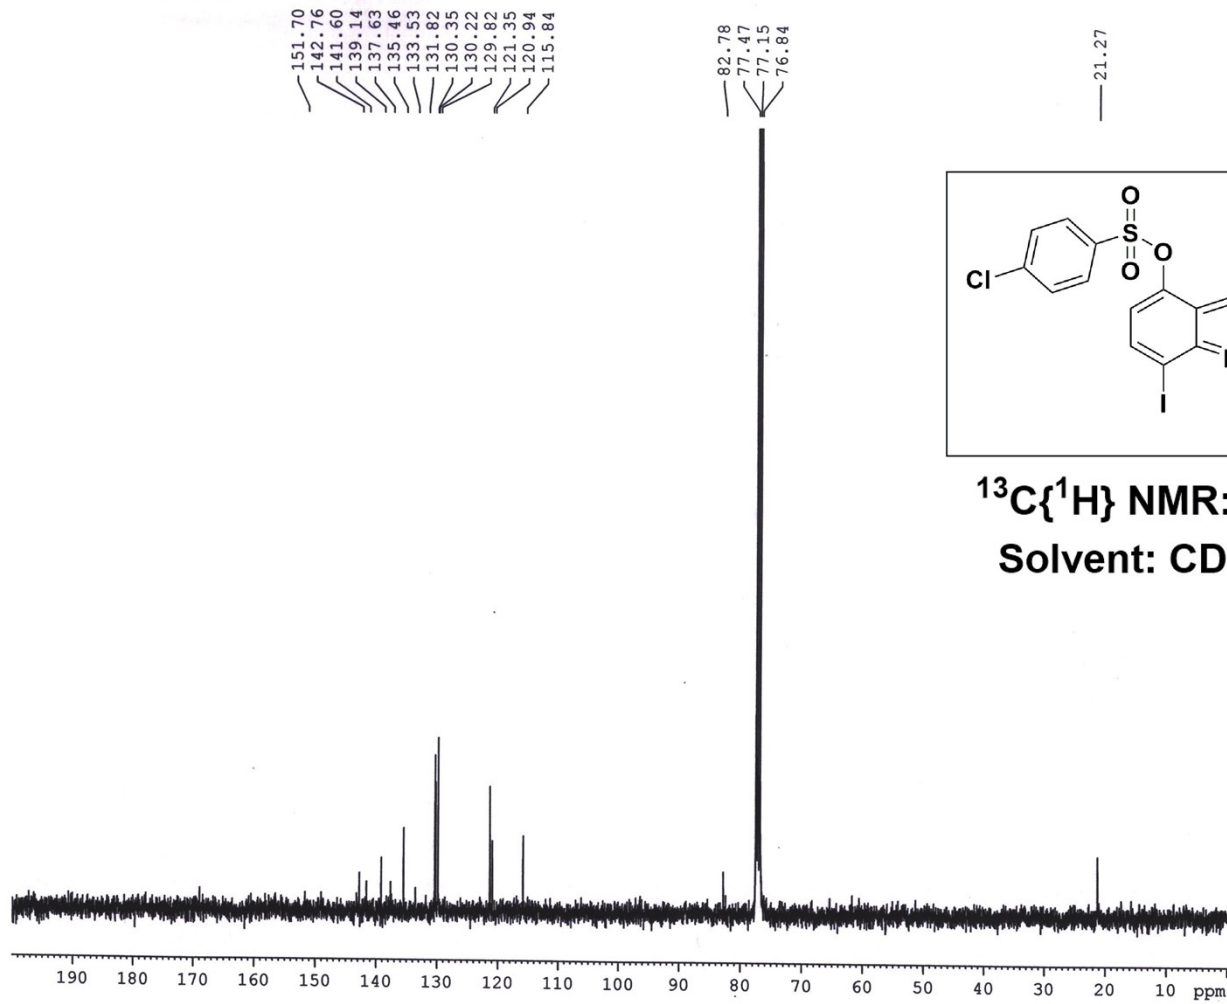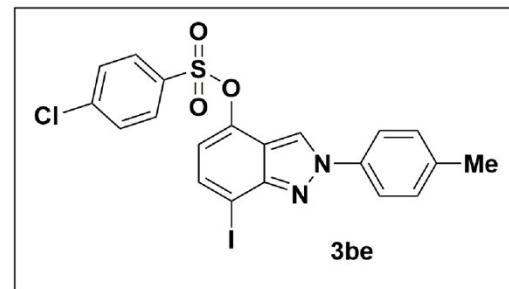

$^{13}\text{C}\{^1\text{H}\}$  NMR: 100 MHz  
Solvent:  $\text{CDCl}_3$



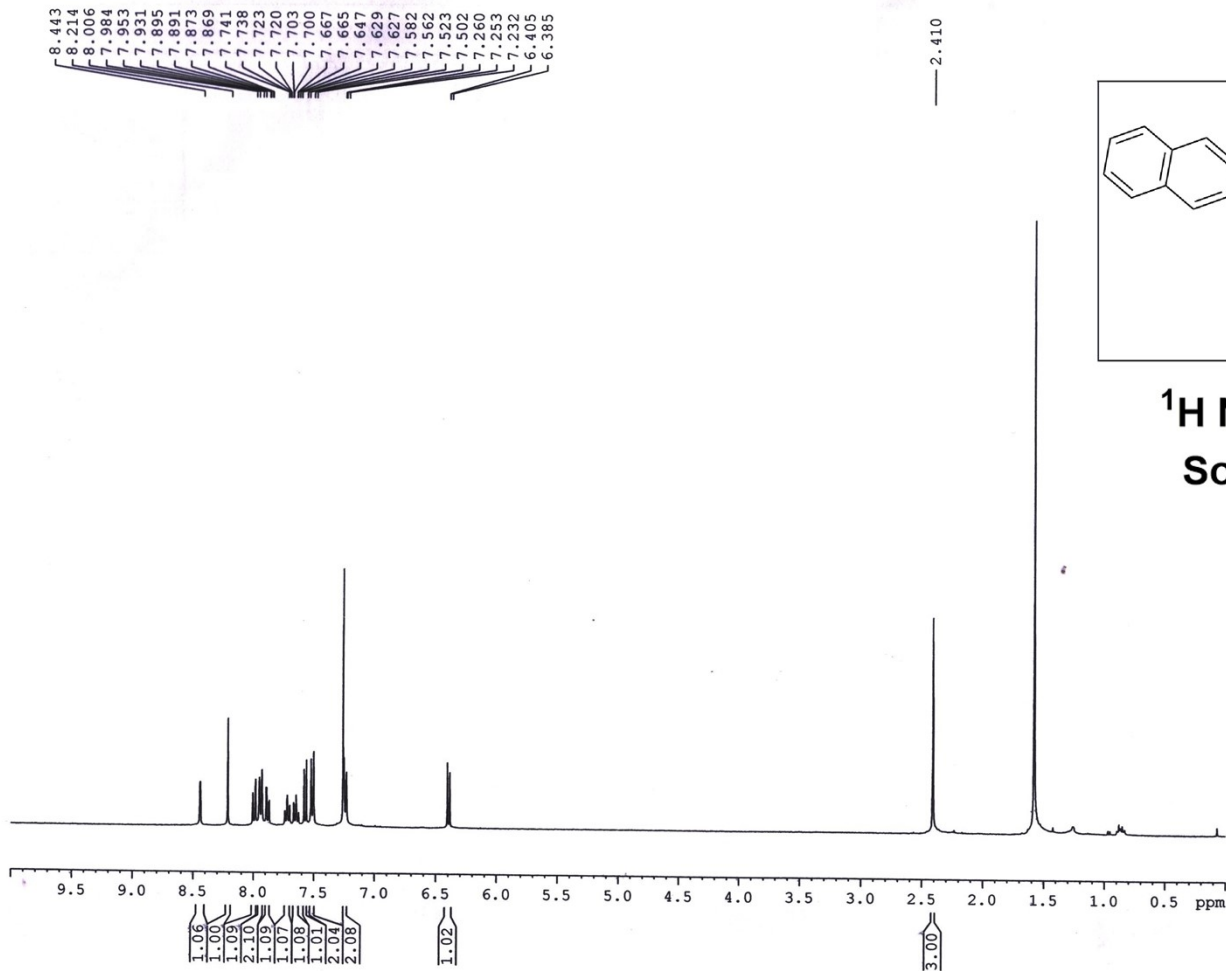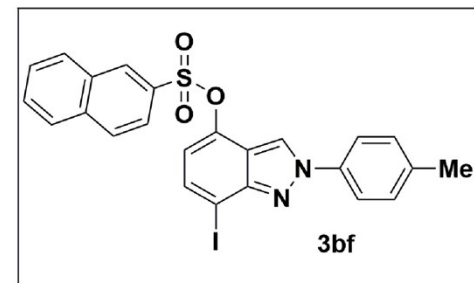

**$^1\text{H}$  NMR: 400 MHz**  
**Solvent:  $\text{CDCl}_3$**

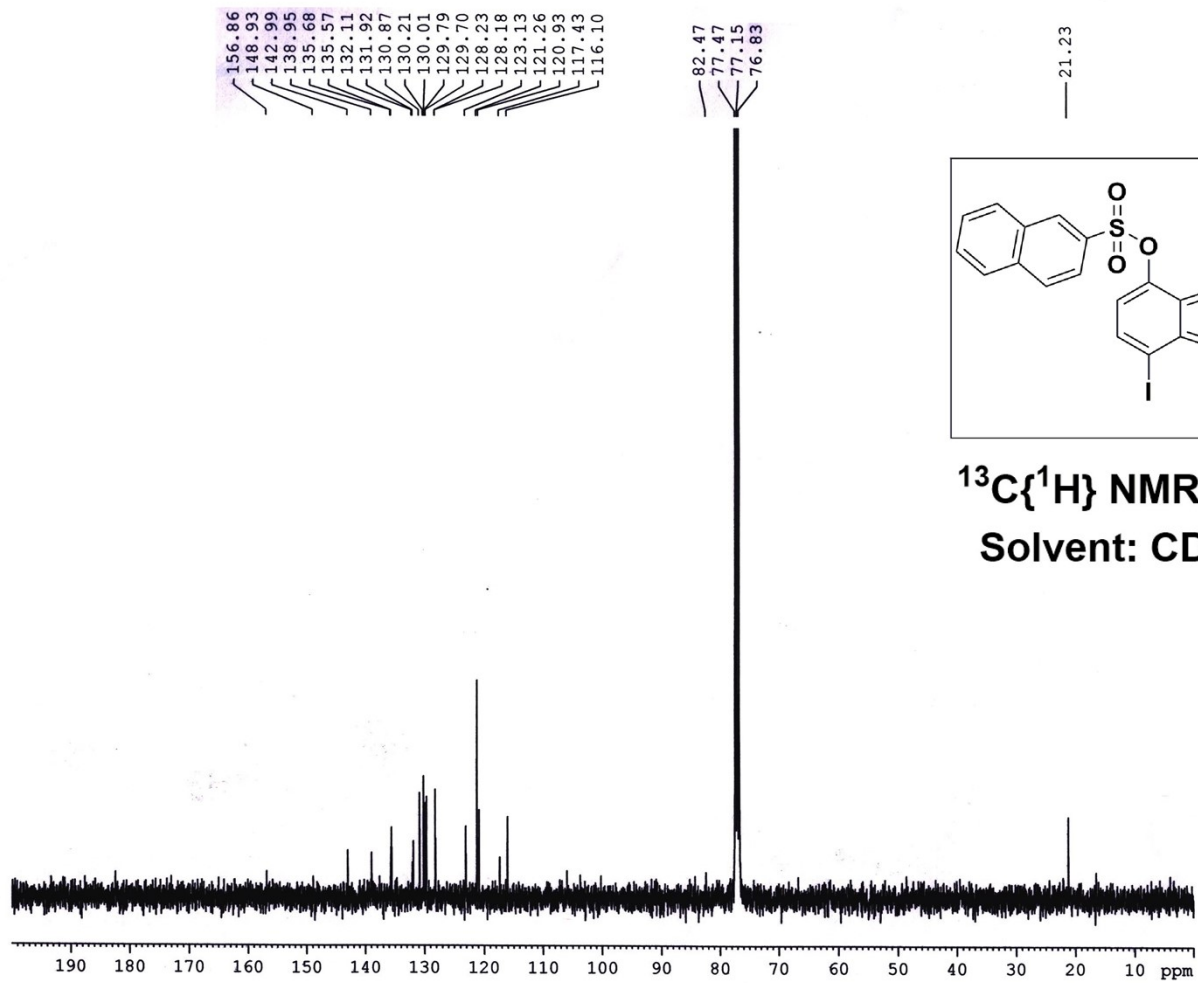

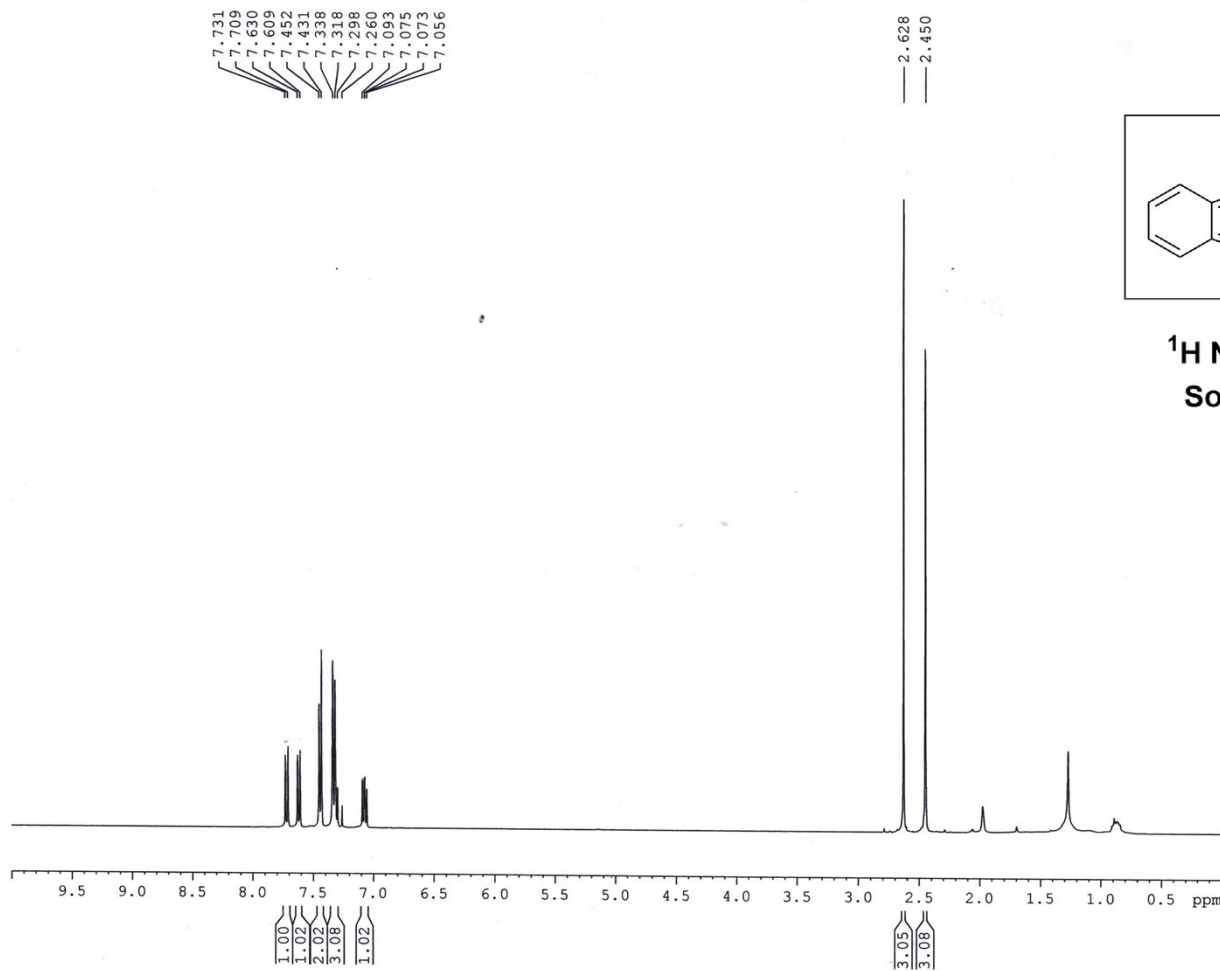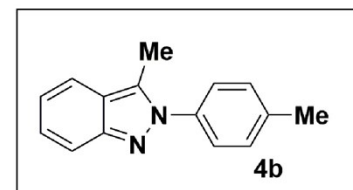

<sup>1</sup>H NMR: 400 MHz  
Solvent: CDCl<sub>3</sub>

148.57  
138.73  
137.50  
131.98  
129.81  
126.74  
125.59  
121.64  
120.88  
120.06  
117.56

77.47  
77.15  
76.83

21.29  
11.18

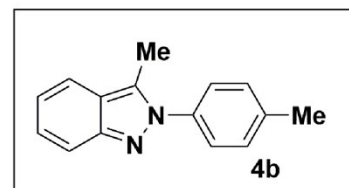

$^{13}\text{C}\{^1\text{H}\}$  NMR: 100 MHz  
Solvent:  $\text{CDCl}_3$

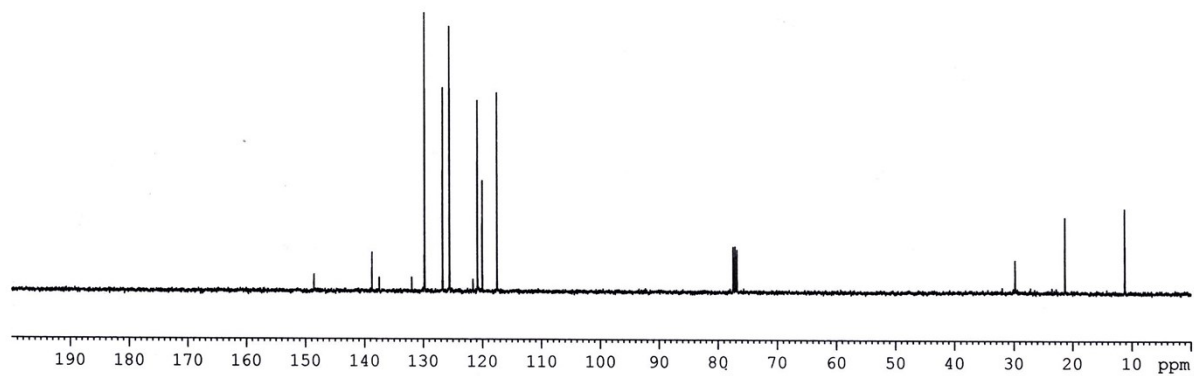

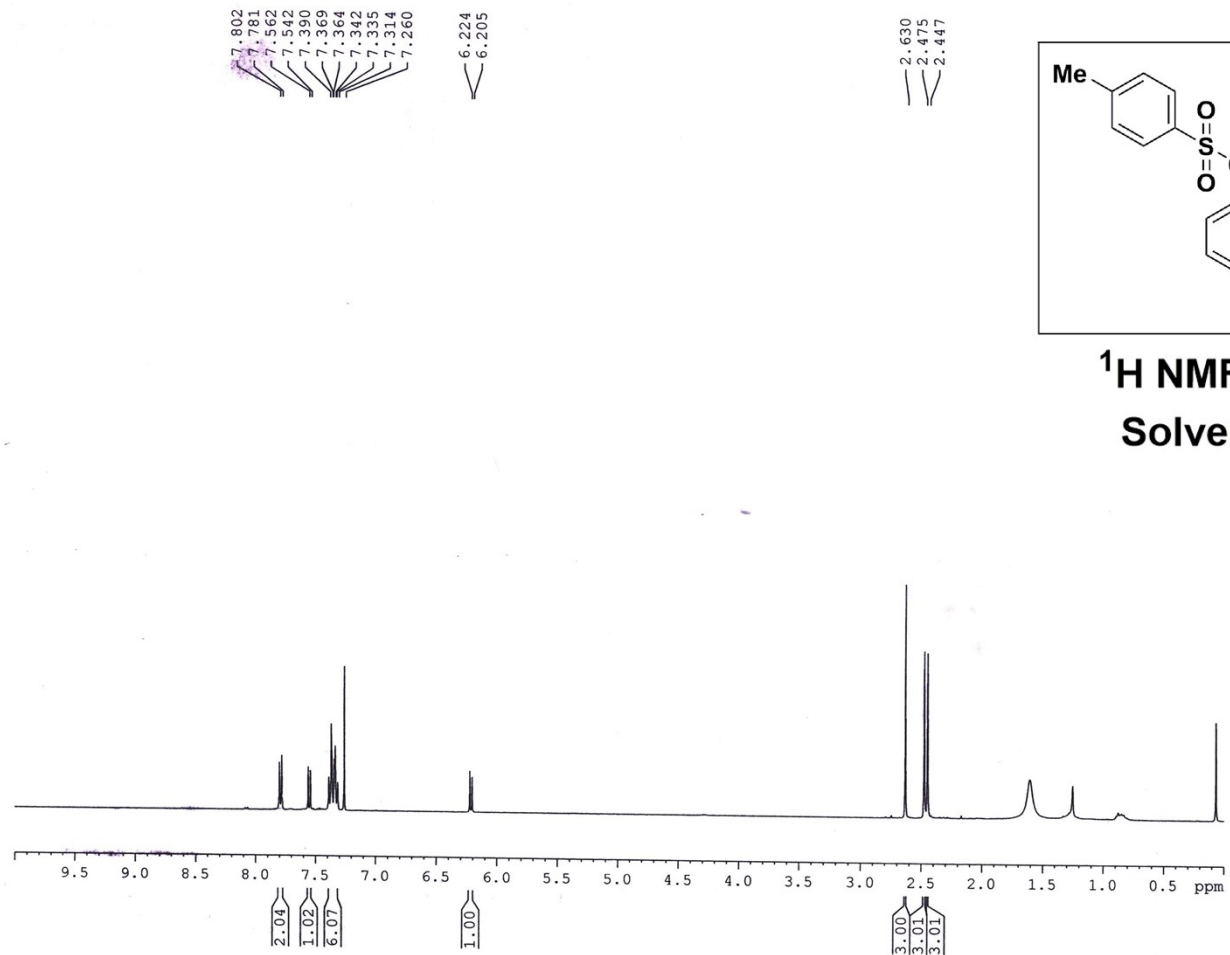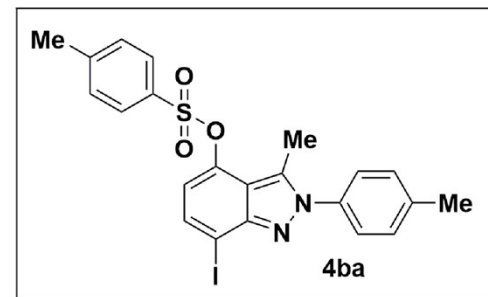

**$^1\text{H}$  NMR: 400 MHz**  
**Solvent:  $\text{CDCl}_3$**

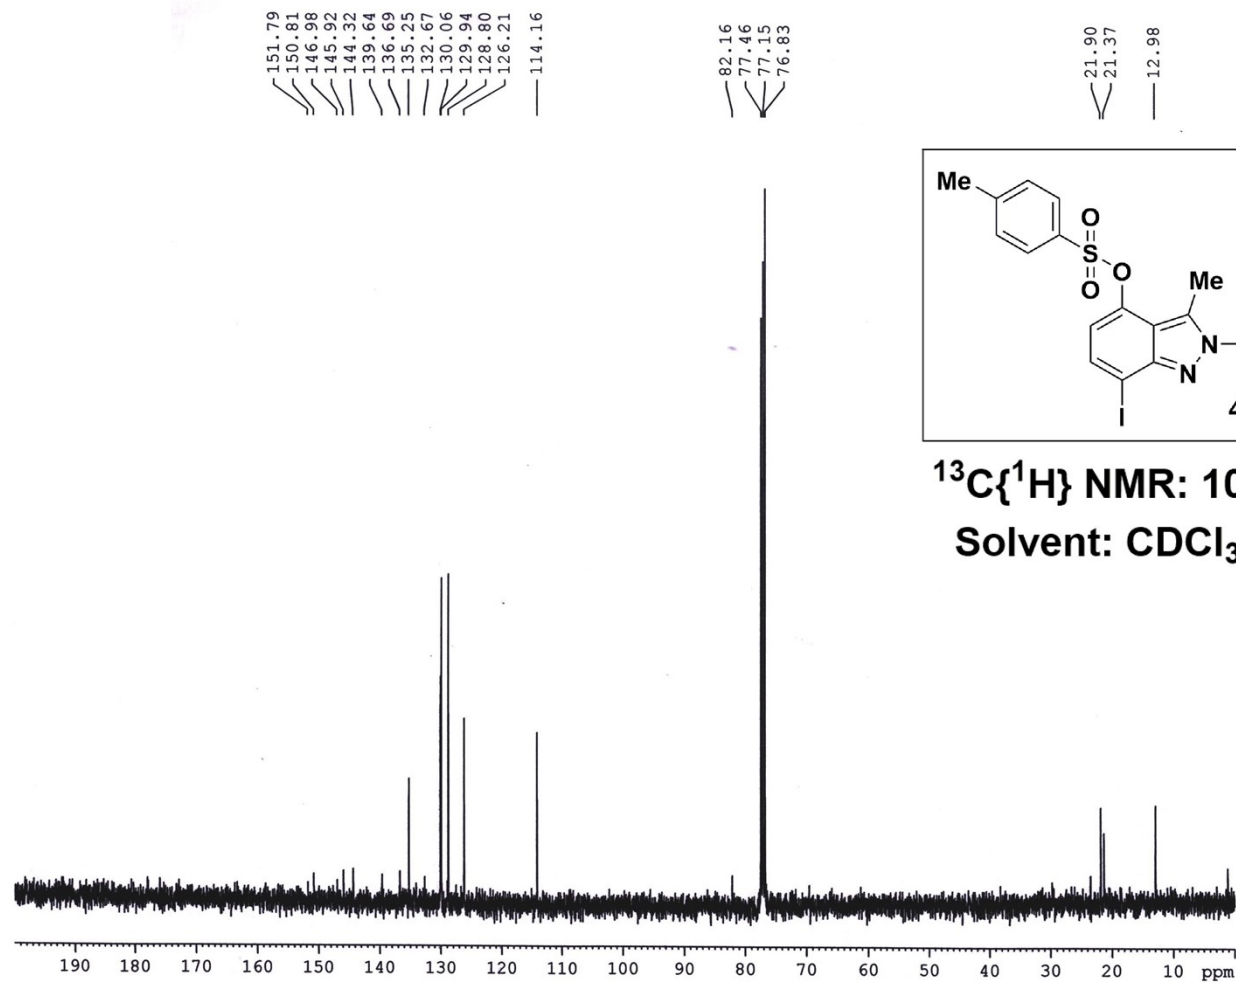

8.184  
7.779  
7.758  
7.702  
7.681  
7.664  
7.642  
7.327  
7.314  
7.307  
7.294  
7.260  
7.167  
7.148  
7.146  
7.127  
6.603  
6.585

2.429  
2.424

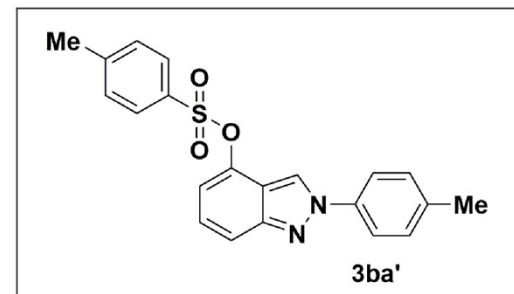

**<sup>1</sup>H NMR: 400 MHz**  
**Solvent: CDCl<sub>3</sub>**

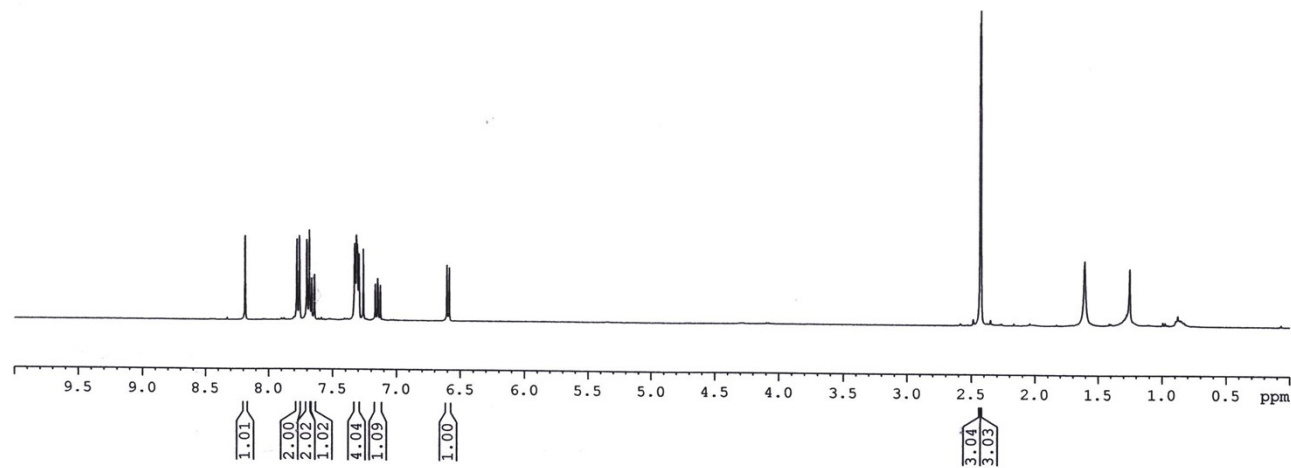

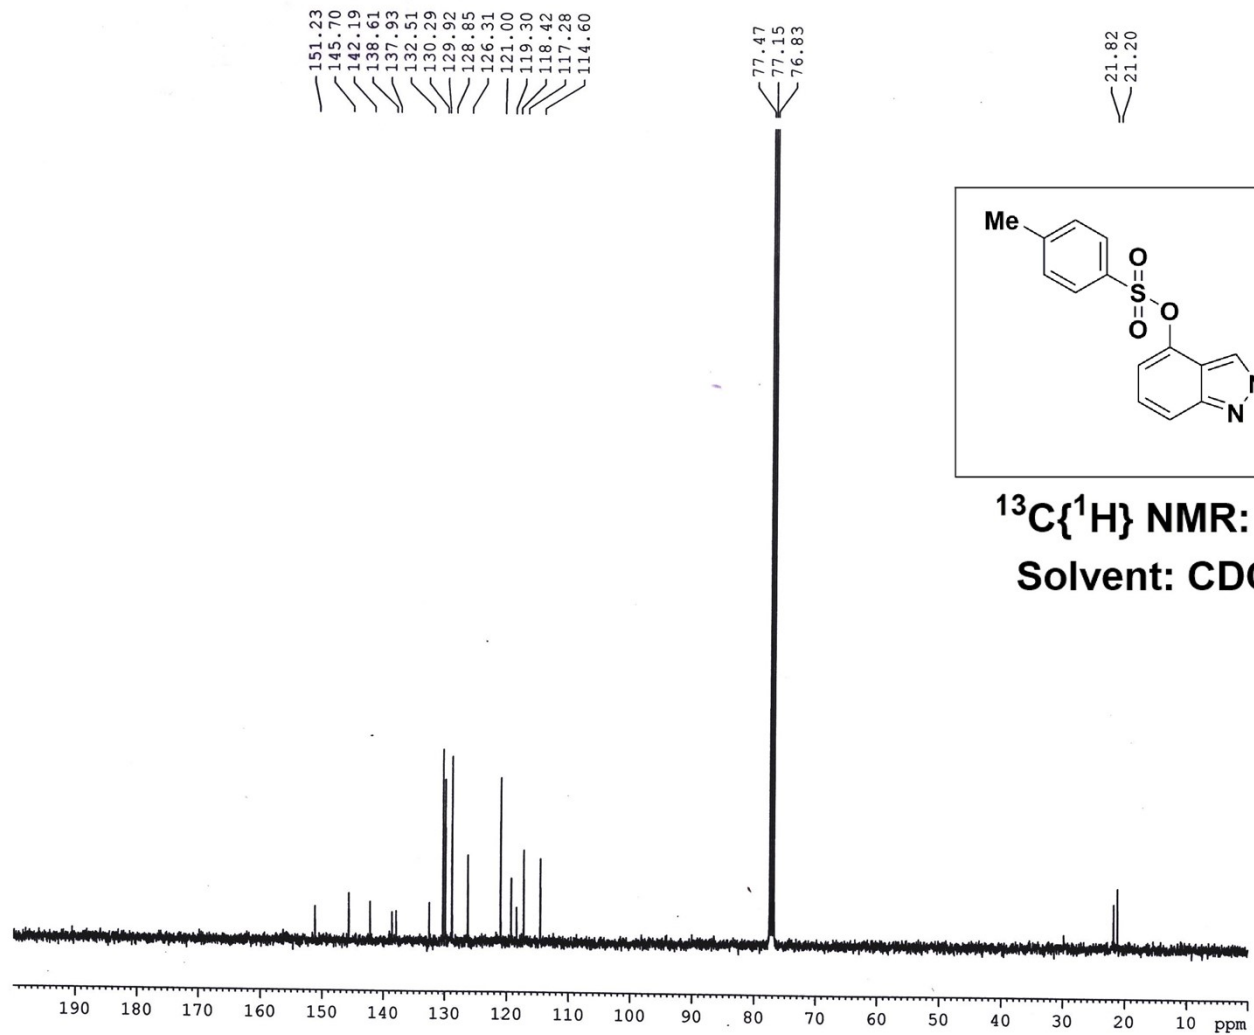



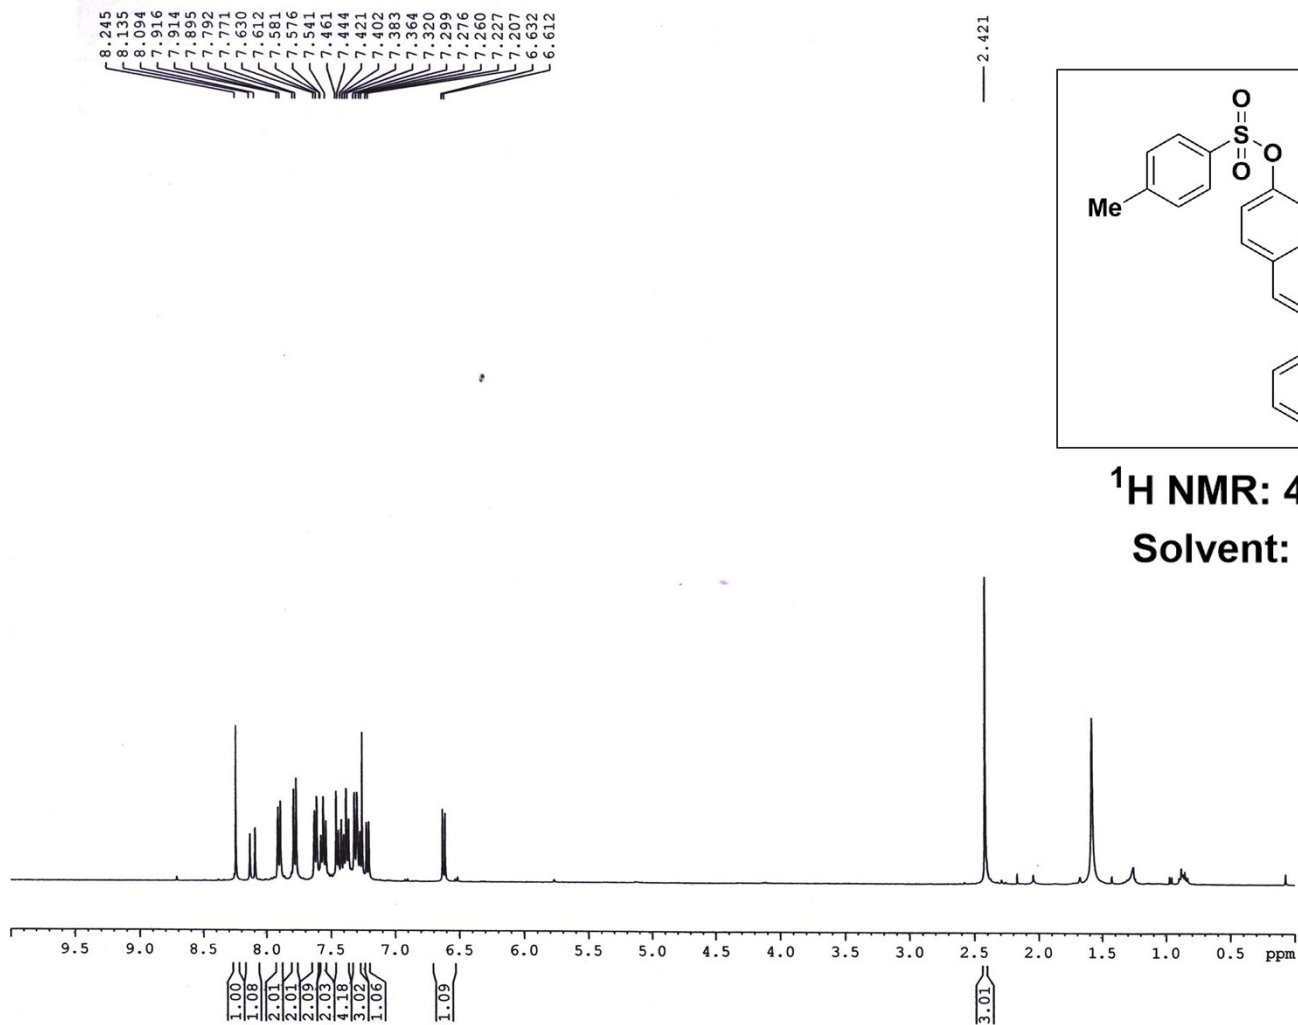

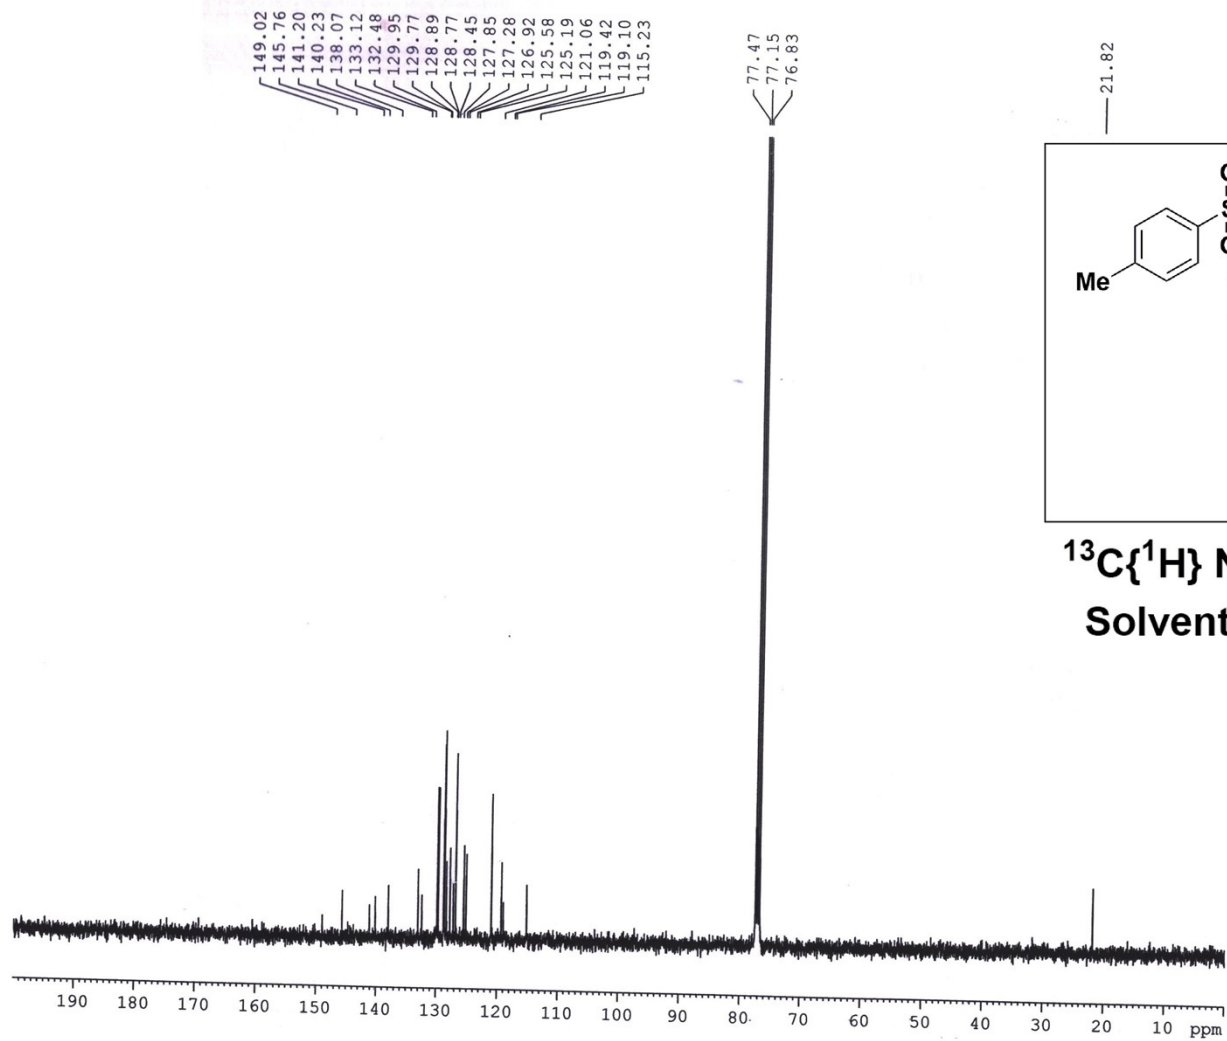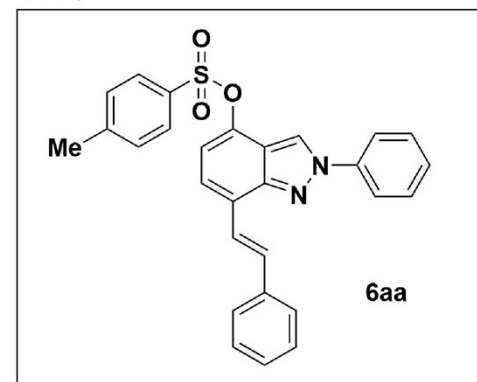

$^{13}\text{C}\{^1\text{H}\}$  NMR: 100 MHz  
Solvent:  $\text{CDCl}_3$

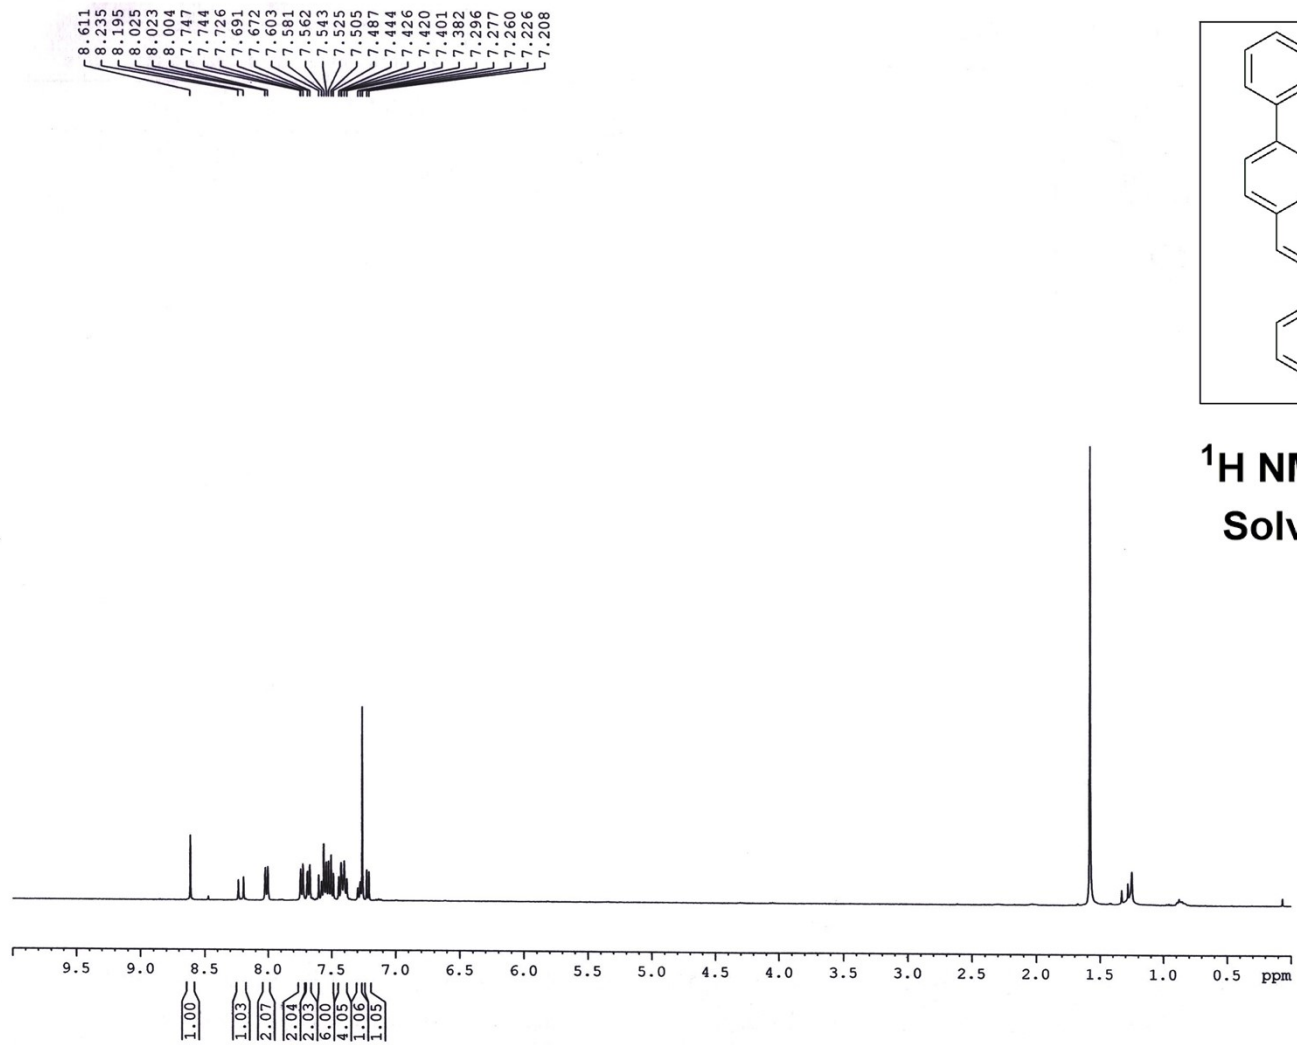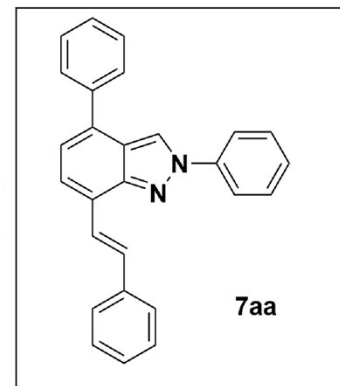

**$^1\text{H}$  NMR: 400 MHz**  
**Solvent:  $\text{CDCl}_3$**

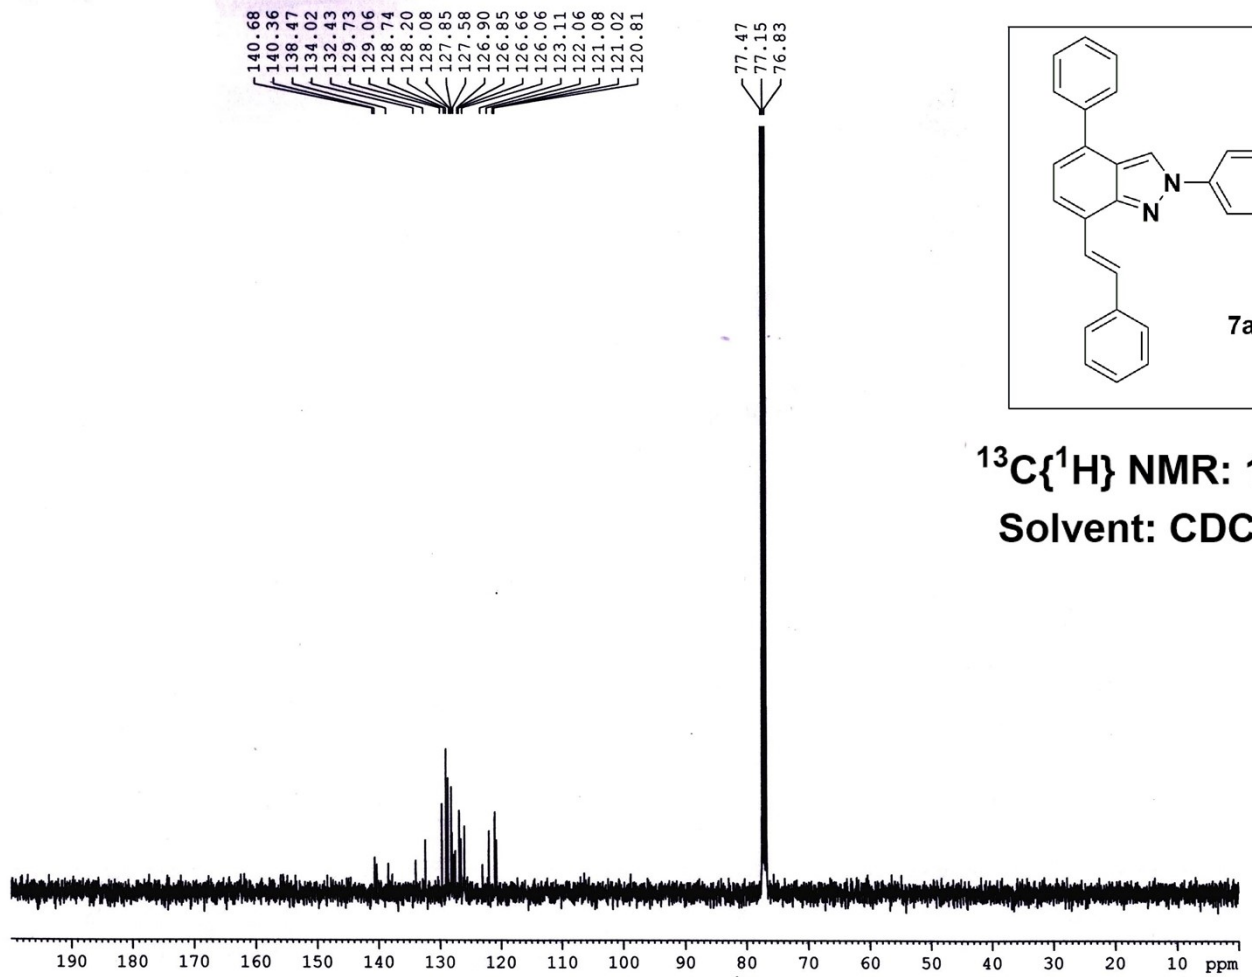

8.634  
8.190  
8.188  
8.183  
8.170  
7.981  
7.978  
7.959  
7.775  
7.772  
7.754  
7.754  
7.574  
7.559  
7.555  
7.541  
7.537  
7.521  
7.501  
7.441  
7.430  
7.412  
7.396  
7.300  
7.282  
7.260

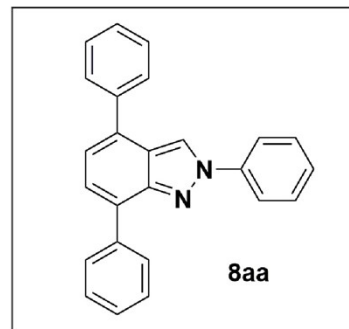

**$^1\text{H}$  NMR: 400 MHz**  
**Solvent:  $\text{CDCl}_3$**

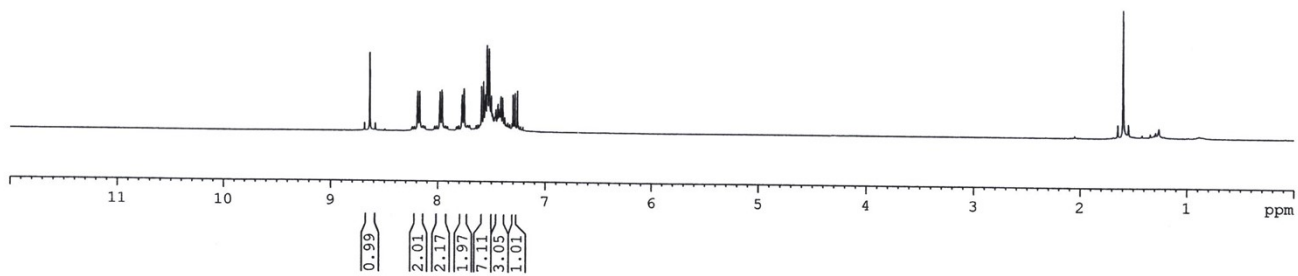

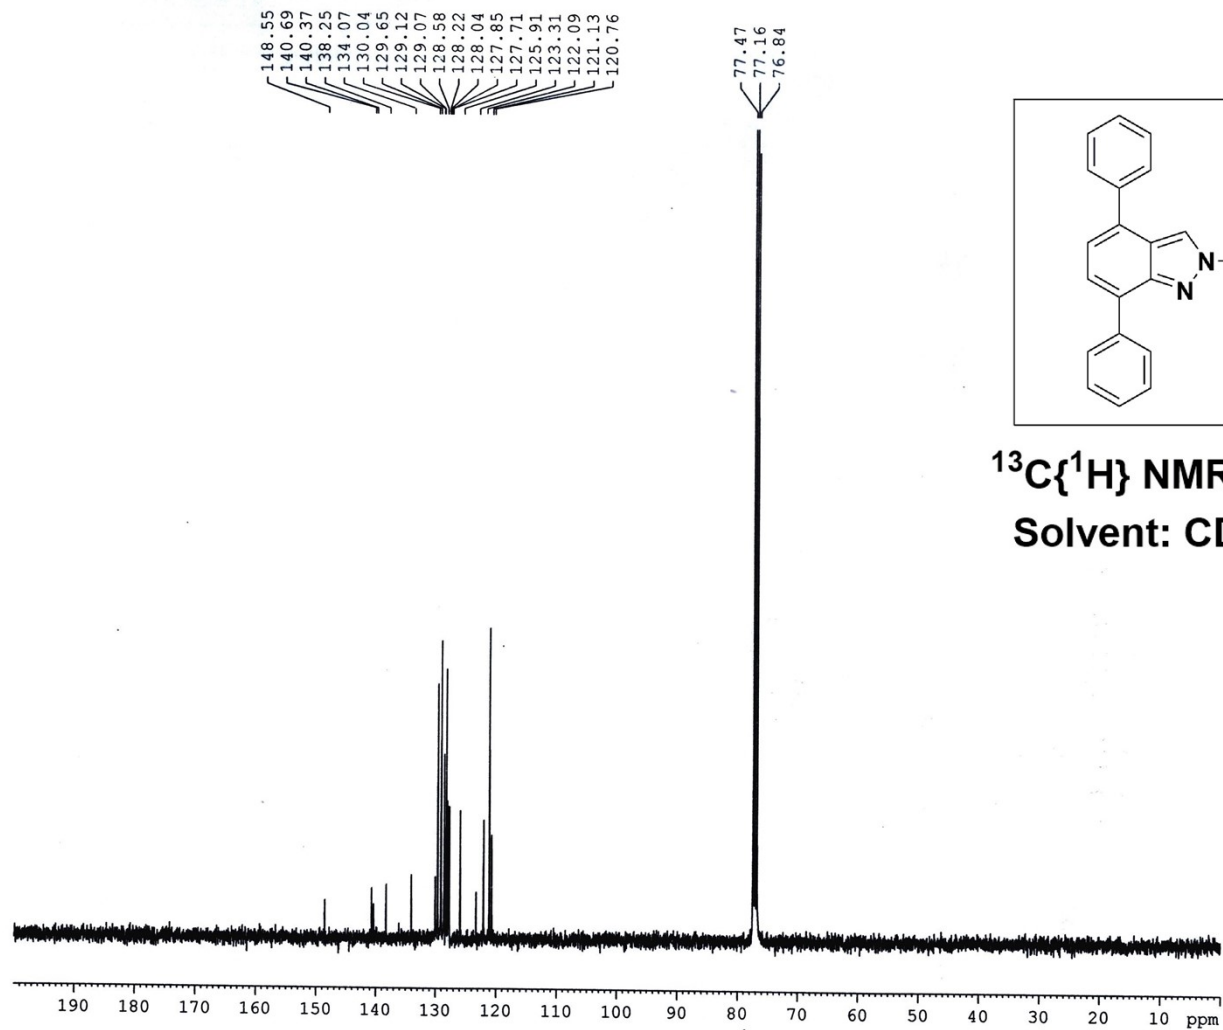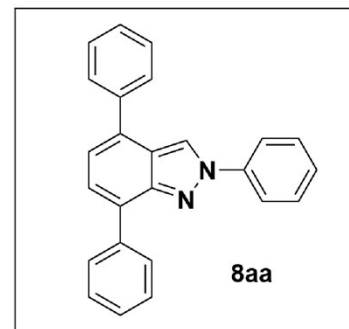

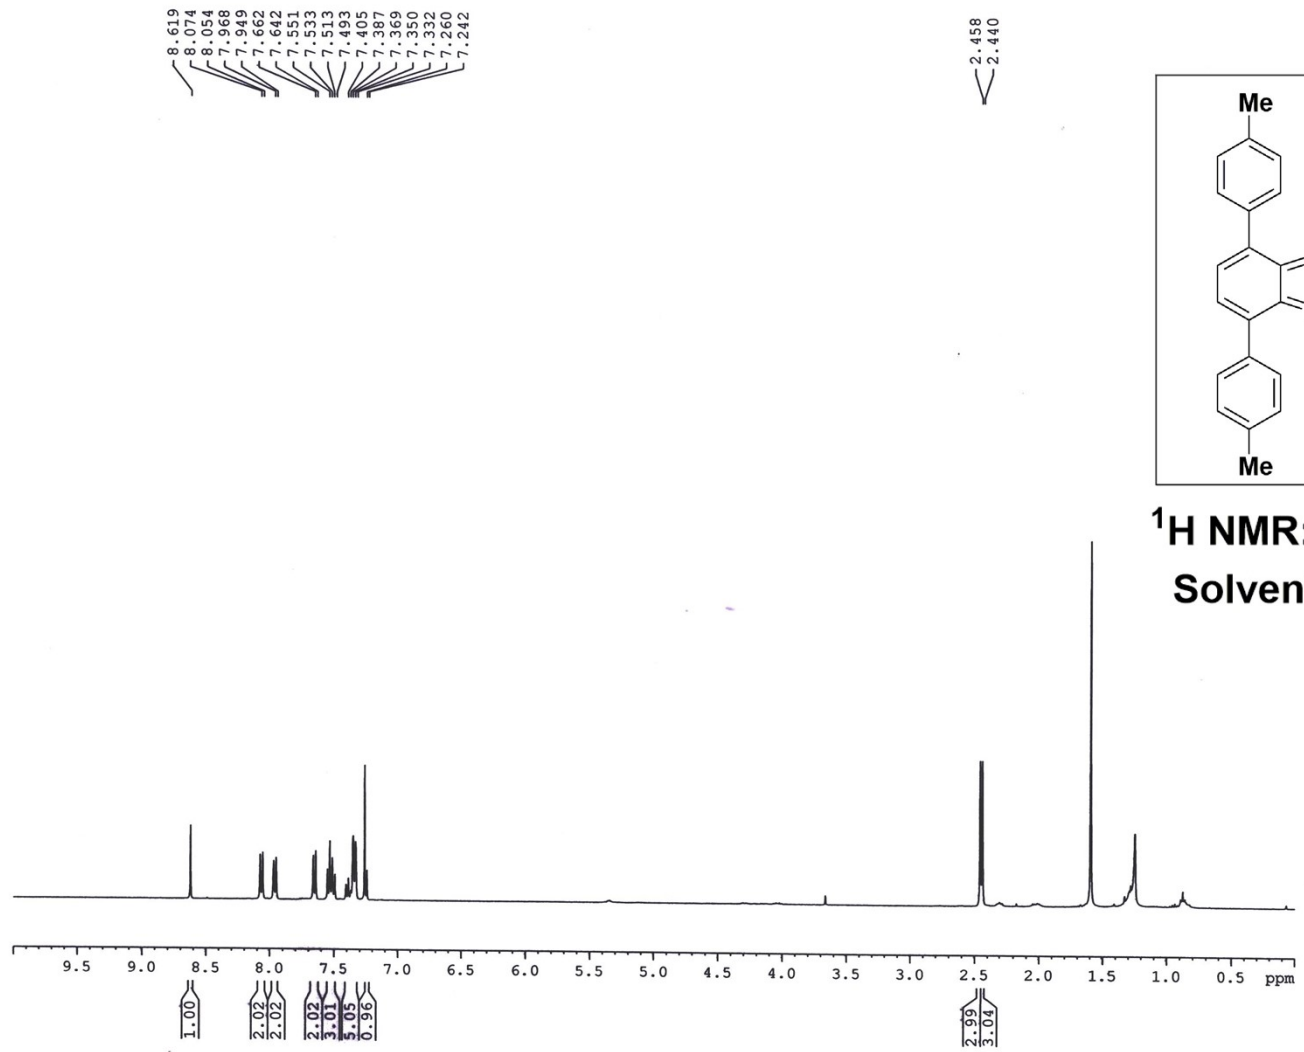

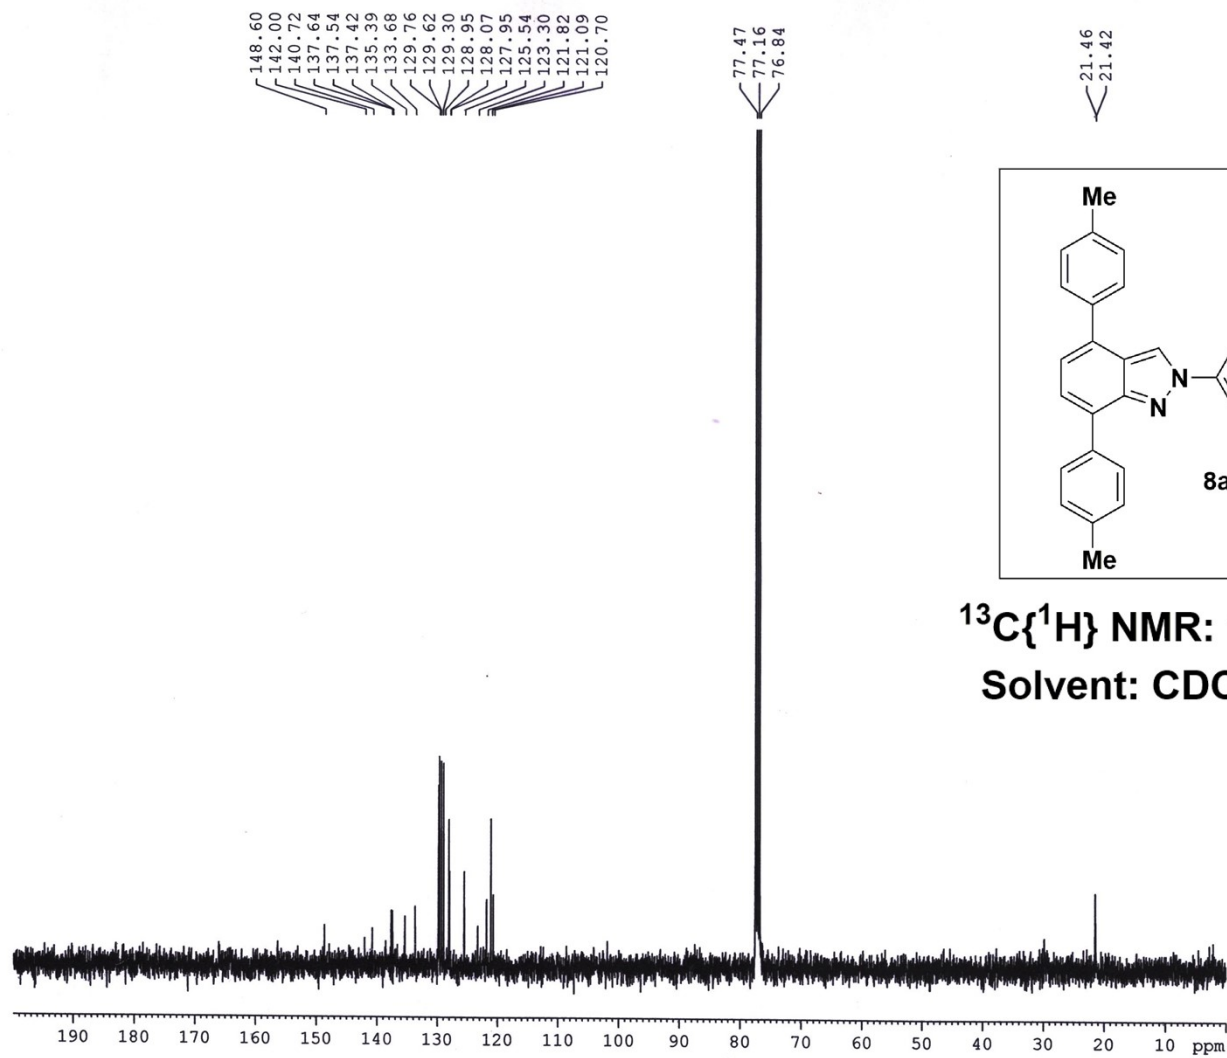



8.258  
7.895  
7.876  
7.768  
7.747  
7.656  
7.648  
7.645  
7.636  
7.632  
7.550  
7.531  
7.511  
7.446  
7.428  
7.410  
7.391  
7.385  
7.382  
7.374  
7.369  
7.360  
7.356  
7.306  
7.286  
7.260  
6.646  
6.627

2.404

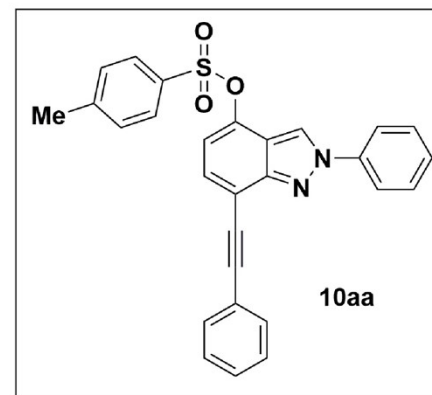

<sup>1</sup>H NMR: 400 MHz  
Solvent: CDCl<sub>3</sub>

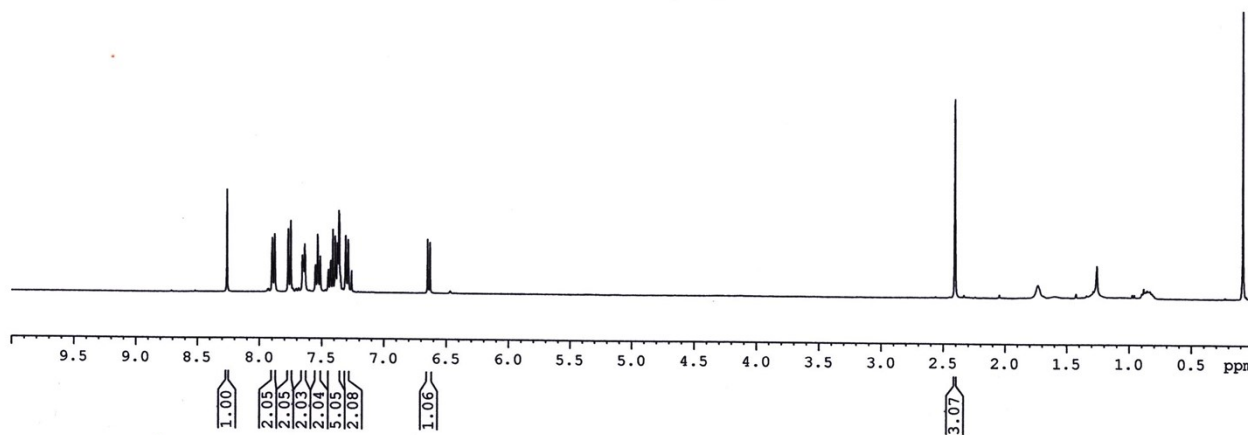

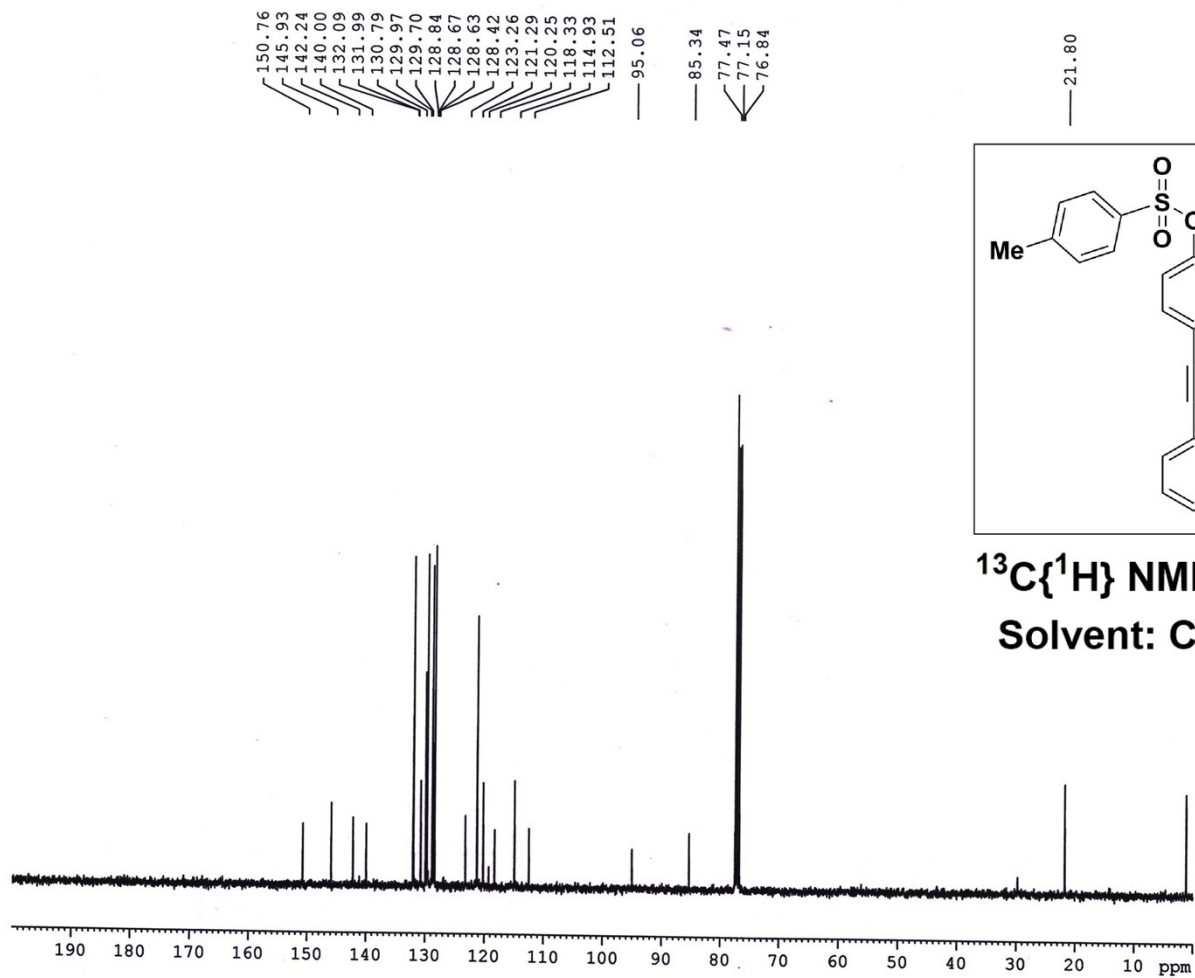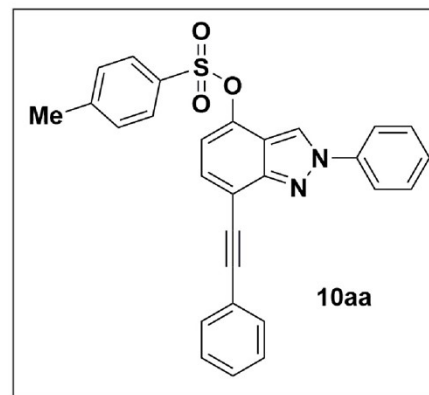

$^{13}\text{C}\{^1\text{H}\}$  NMR: 100 MHz  
Solvent:  $\text{CDCl}_3$

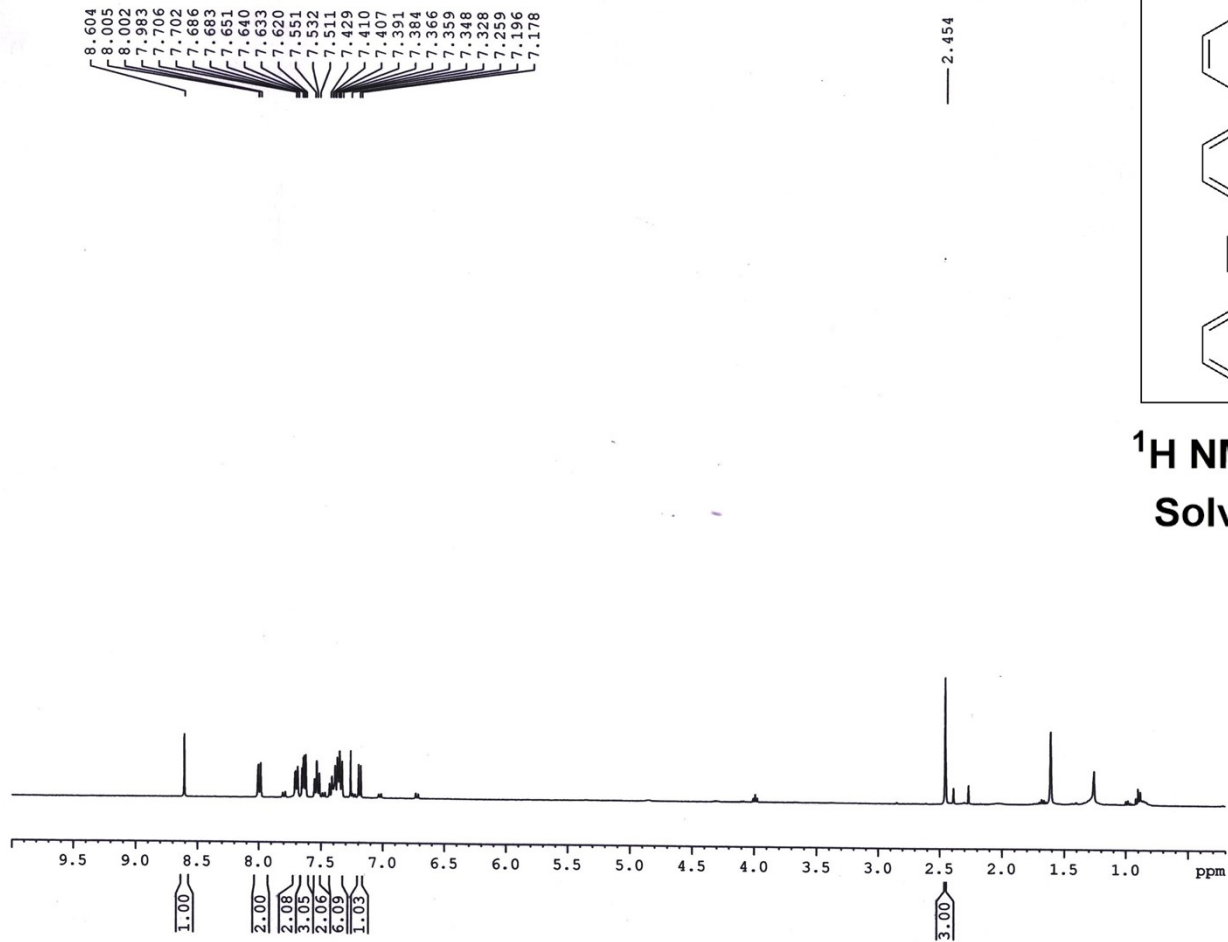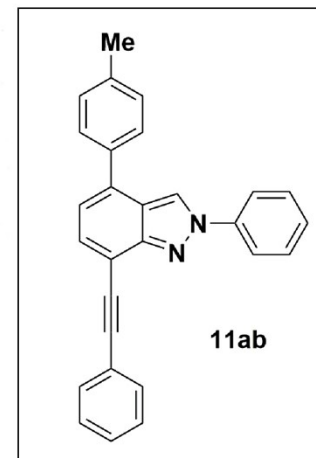

**<sup>1</sup>H NMR: 400 MHz**  
**Solvent: CDCl<sub>3</sub>**

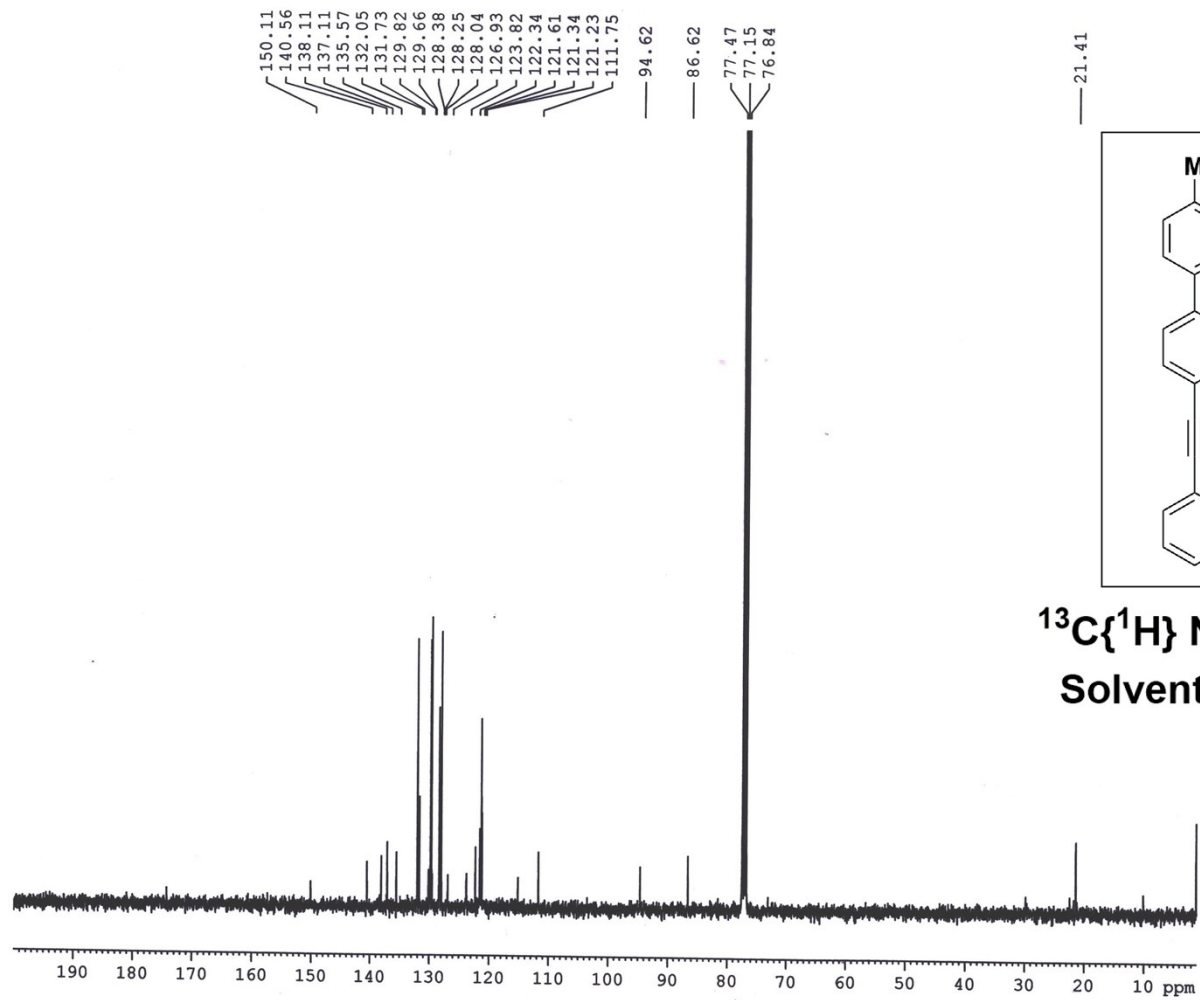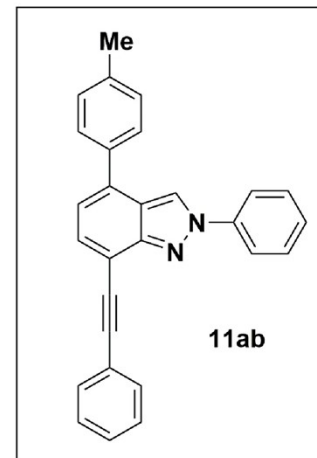

$^{13}\text{C}\{^1\text{H}\}$  NMR: 100 MHz  
Solvent:  $\text{CDCl}_3$
